# Supplementary material for: In silico analysis to link insulin resistance, obesity, and ageing with Alzheimer’s disease
Source: Research Square preprint supplement (doi:10.21203/rs.3.rs-512487/v1), 2021-06-10
Supplement: Supplementary file 1 [file d99624a0237faa2bca6dbba9.xlsx]

## Sheet: GENES COMMON IN AD and IR-Ob
gene_id	gene_symbol
FBgn0002565	Lsp2
FBgn0036015	CG3088
FBgn0010222	Nmdmc
FBgn0040732	CG16926
FBgn0020385	pug
FBgn0036022	CG8329
FBgn0033067	CG11211
FBgn0031824	CG9547
FBgn0014031	Spat
FBgn0086691	UK114
FBgn0001125	Got2
FBgn0036783	CheA75a
FBgn0259736	CG42390
FBgn0031432	Cyp309a1
FBgn0040773	COX7C
FBgn0052523	CG32523
FBgn0037801	CG3999
FBgn0031645	CG3036
FBgn0031558	CG16704
FBgn0034290	CG5773
FBgn0039656	CG11951
FBgn0061356	CG18003
FBgn0052850	CG32850
FBgn0001257	ImpL2
FBgn0034468	Obp56a
FBgn0030271	CG15202
FBgn0051960	CG31960
FBgn0031913	CG5958
FBgn0038236	Cyp313a1
FBgn0036707	CG13724
FBgn0005614	trpl
FBgn0039498	CG17991
FBgn0263199	Galk
FBgn0035298	SCOT
FBgn0015035	Cyp4e3
FBgn0038983	CG5326
FBgn0261618	larp
FBgn0041194	Prat2
FBgn0034479	CG8654
FBgn0083975	Nlg4
FBgn0039299	CG11854
FBgn0039677	ppk30
FBgn0036410	CG8100
FBgn0037169	CG11404
FBgn0031461	daw
FBgn0053012	CG33012
FBgn0003380	Sh
FBgn0012051	CalpA
FBgn0259241	CG42339
FBgn0034076	Jhedup
FBgn0036116	CG7888
FBgn0033978	Cyp6a23
FBgn0034045	CG8249
FBgn0024179	wit
FBgn0086676	spin
FBgn0026533	Dek
FBgn0010825	Gug
FBgn0037612	CG8112
FBgn0033212	LRR
FBgn0032286	CG7300
FBgn0036806	Cyp12c1
FBgn0031759	lid
FBgn0010473	tutl
FBgn0002936	ninaA
FBgn0053993	CG33993
FBgn0003996	w
FBgn0038858	CG5793
FBgn0032139	CG13116
FBgn0039049	CG6726
FBgn0015777	nrv2
FBgn0013307	Odc1
FBgn0035583	CG13704
FBgn0032946	nrv3
FBgn0037443	Dmtn
FBgn0029878	Pat1
FBgn0286198	LKRSDH
FBgn0259108	futsch
FBgn0002567	Rab32
FBgn0053453	CG33453
FBgn0032810	CG13077
FBgn0051901	Mur29B
FBgn0038973	Pebp1
FBgn0053234	CG33234
FBgn0031813	CG9527
FBgn0053494	CG33494
FBgn0260795	NaPi-III
FBgn0052029	Cpr66D
FBgn0039298	to
FBgn0085422	CG34393
FBgn0034072	Dg
FBgn0037448	CG15186
FBgn0051681	CG31681
FBgn0036422	CG3868
FBgn0035412	CG14957
FBgn0035171	CG12502
FBgn0004244	Rdl
FBgn0037910	CG14708
FBgn0086359	Invadolysin
FBgn0041605	cpx
FBgn0278608	Dsp1
FBgn0019952	Orct
FBgn0002940	ninaE
FBgn0030648	CG6340
FBgn0034480	CG16898
FBgn0041182	Tep2
FBgn0261552	ps
FBgn0011205	fbl
FBgn0032074	Tsp29Fa
FBgn0264556	Gr39a
FBgn0035112	CG13877
FBgn0066101	LpR1
FBgn0037819	CG14688
FBgn0039326	CG10562
FBgn0265356	tn
FBgn0039203	CG13618
FBgn0086655	jing
FBgn0039151	CG13607
FBgn0013751	Awh
FBgn0029092	ced-6
FBgn0032503	CG16825
FBgn0037606	CG8032
FBgn0034318	CG14500
FBgn0033048	CG7881
FBgn0051769	CG31769
FBgn0259219	CG42319
FBgn0034784	CG9826
FBgn0030013	GIIIspla2
FBgn0004595	pros
FBgn0261788	Ank2
FBgn0038659	EndoA
FBgn0019830	colt
FBgn0051533	CG31533
FBgn0026593	CG5707
FBgn0004516	Gad1
FBgn0260632	dl
FBgn0025578	Lcp9
FBgn0028945	CG7631
FBgn0003372	Sgs1
FBgn0003371	sgg
FBgn0037363	Atg17
FBgn0287184	FASN3
FBgn0038652	CG7720
FBgn0038466	CG8907
FBgn0031752	CG9044
FBgn0000279	CecC
FBgn0035186	CG13912
FBgn0036059	nudE
FBgn0037315	Cerk
FBgn0043364	cbt
FBgn0002781	mod(mdg4)
FBgn0263235	Phae2
FBgn0034998	CG13577
FBgn0261612	CngA
FBgn0035453	CG10357
FBgn0038204	CG14357
FBgn0033872	CG6329
FBgn0028920	CG8997
FBgn0033739	Dyb
FBgn0040588	CG13841
FBgn0031004	CG7992
FBgn0259222	CG42322
FBgn0264556	Gr39a
FBgn0036131	CG12522
FBgn0032087	CG9568
FBgn0003979	Vm26Aa
FBgn0032075	Tsp29Fb
FBgn0087005	rtp
FBgn0259211	grh
FBgn0000108	Appl
FBgn0085430	CG34401
FBgn0265623	Su(z)2
FBgn0261261	plx
FBgn0030358	CG10362
FBgn0033904	CG18327
FBgn0033188	Drat
FBgn0035673	CG6602
FBgn0004623	Gbeta76C
FBgn0261862	whd
FBgn0010313	corto
FBgn0003089	pip
FBgn0030073	CG10962
FBgn0263601	mib1
FBgn0050281	CG30281
FBgn0033484	CG2269
FBgn0010113	hdc
FBgn0030049	Trf4-1
FBgn0036031	CG6761
FBgn0039651	Cyt-c1L
FBgn0030778	CG4678
FBgn0086784	stmA
FBgn0051928	CG31928
FBgn0265186	CG44251
FBgn0011676	Nos
FBgn0260486	Ziz
FBgn0010316	dap
FBgn0038839	Ktl
FBgn0033140	CG12836
FBgn0040795	CG13038
FBgn0025712	CG13920
FBgn0027562	CG10345
FBgn0031775	CG9150
FBgn0036321	CG14120
FBgn0010403	Obp83b
FBgn0036463	Reck
FBgn0031058	CG14227
FBgn0041181	Tep3
FBgn0033830	CG10814
FBgn0036152	CG6175
FBgn0013762	Cdk5
FBgn0030066	CG42336
FBgn0266418	wake
FBgn0038803	CG5191
FBgn0003651	svp
FBgn0043575	PGRP-SC2
FBgn0033139	Tsp42Er
FBgn0263706	CG43658
FBgn0037670	Ibf1
FBgn0259168	mnb
FBgn0014388	sty
FBgn0034618	CG9485
FBgn0083940	RhoU
FBgn0083969	CG34133
FBgn0032116	Mco1
FBgn0035023	ITP
FBgn0039419	CG12290
FBgn0035375	Pgant6
FBgn0267350	Pi4KIIIalpha
FBgn0262636	dati
FBgn0030941	wgn
FBgn0039184	CG6432
FBgn0261268	Cul3
FBgn0034541	CG13437
FBgn0052432	CG32432
FBgn0027584	CG4757
FBgn0034364	CG5493
FBgn0011283	Obp28a
FBgn0033474	CG1407
FBgn0063494	GstE6
FBgn0283451	br
FBgn0033901	O-fut1
FBgn0037822	CG14683
FBgn0051778	CG31778
FBgn0032126	CG13113
FBgn0016926	Pino
FBgn0261675	Npc1b
FBgn0032127	CG13114
FBgn0259173	corn
FBgn0259099	DCX-EMAP
FBgn0033788	CG13323
FBgn0038878	CG3301
FBgn0023441	fus
FBgn0037186	CG11241
FBgn0015229	glec
FBgn0040688	CG12483
FBgn0031632	CG15628
FBgn0031251	CG4213
FBgn0033893	CG18371
FBgn0037973	CG18547
FBgn0035101	p130CAS
FBgn0259745	wech
FBgn0034481	CG11041
FBgn0053341	CG33341
FBgn0032129	jp
FBgn0014019	Rh5
FBgn0038814	CG15923
FBgn0029763	Usp16-45
FBgn0032322	CG16743
FBgn0031621	Elba3
FBgn0034837	RpL22-like
FBgn0035392	CG1271
FBgn0051869	CG31869
FBgn0015600	toc
FBgn0266450	Kr-h1
FBgn0037860	CG6629
FBgn0031741	CG11034
FBgn0011582	Dop1R1
FBgn0264295	CG43773
FBgn0038607	hmw
FBgn0033999	CG8093
FBgn0003339	Scr
FBgn0031418	CG3609
FBgn0034454	CG15120
FBgn0036159	CG7557
FBgn0014009	Rab2
FBgn0032235	CG5096
FBgn0020224	Cbl
FBgn0028371	jbug
FBgn0051075	CG31075
FBgn0014033	Sr-CI
FBgn0031700	CG14022
FBgn0031895	CG4497
FBgn0024366	CG11409
FBgn0004921	Ggamma1
FBgn0052512	CG32512
FBgn0000075	amd
FBgn0030581	CG14408
FBgn0259682	Jabba
FBgn0038610	CG7675
FBgn0267912	CanA-14F
FBgn0002781	mod(mdg4)
FBgn0038972	CG7054
FBgn0267435	chp
FBgn0030615	Cyp4s3
FBgn0031975	Tg
FBgn0004620	GluRIIA
FBgn0033294	Mal-A4
FBgn0262483	Rbp
FBgn0036208	CG10361
FBgn0039911	CG1909
FBgn0002778	mnd
FBgn0030607	dob
FBgn0283680	IP3K2
FBgn0031564	CG2816
FBgn0266346	CngB
FBgn0265988	mv
FBgn0030004	CG10958
FBgn0259985	Mppe
FBgn0030854	CG8289
FBgn0039207	CG5789
FBgn0003984	vn
FBgn0020906	Jon25Bi
FBgn0027608	CG2082
FBgn0028374	Hug
FBgn0011722	Tig
FBgn0035170	dpr20
FBgn0015561	unpg
FBgn0034012	Hr51
FBgn0037646	CAHbeta
FBgn0039756	CG9743
FBgn0260953	CG42585
FBgn0039827	CG1544
FBgn0041337	Cyp309a2
FBgn0021796	Tor
FBgn0030612	CG5599
FBgn0029880	CG14443
FBgn0243486	rdo
FBgn0037616	CG8136
FBgn0002872	mu2
FBgn0037940	CG14720
FBgn0039476	CG6271
FBgn0003250	Rh4
FBgn0033649	pyr
FBgn0052225	CG32225
FBgn0261041	stj
FBgn0033422	Or45b

## Sheet: Func. annotation of data-DAVID
Functional annotation of the genes found common among AD and IR-Obese data obtained through DAVID
ID	Gene Name	COG_ONTOLOGY	GOTERM_BP_DIRECT	GOTERM_CC_DIRECT	GOTERM_MF_DIRECT	INTERPRO	KEGG_PATHWAY	PIR_SUPERFAMILY	SMART	UP_KEYWORDS	UP_SEQ_FEATURE
38863	Ankyrin 2(Ank2)		GO:0000226~microtubule cytoskeleton organization,GO:0007165~signal transduction,GO:0007528~neuromuscular junction development,GO:0007605~sensory perception of sound,GO:0007614~short-term memory,GO:0019233~sensory perception of pain,GO:0045887~positive regulation of synaptic growth at neuromuscular junction,GO:0048675~axon extension,GO:0070050~neuron cellular homeostasis,GO:0072661~protein targeti…	GO:0005737~cytoplasm,GO:0005886~plasma membrane,GO:0031594~neuromuscular junction,GO:0036062~presynaptic periactive zone,GO:0042734~presynaptic membrane,GO:0043195~terminal bouton,	GO:0008092~cytoskeletal protein binding,GO:0008093~cytoskeletal adaptor activity,GO:0030507~spectrin binding,	IPR000488:Death domain,IPR000906:ZU5,IPR002110:Ankyrin repeat,IPR011029:Death-like domain,IPR020683:Ankyrin repeat-containing domain,			SM00218:ZU5,SM00248:ANK,	ANK repeat,Coiled coil,Complete proteome,Proteomics identification,Reference proteome,
38451	Arrowhead(Awh)		GO:0006351~transcription, DNA-templated,GO:0006355~regulation of transcription, DNA-templated,GO:0007444~imaginal disc development,GO:0010468~regulation of gene expression,GO:0048749~compound eye development,	GO:0005634~nucleus,	GO:0003677~DNA binding,GO:0003700~transcription factor activity, sequence-specific DNA binding,GO:0008270~zinc ion binding,	IPR001356:Homeodomain,IPR001781:Zinc finger, LIM-type,IPR009057:Homeodomain-like,			SM00132:LIM,SM00389:HOX,	Alternative splicing,Complete proteome,Developmental protein,DNA-binding,Homeobox,LIM domain,Metal-binding,Nucleus,Phosphoprotein,Reference proteome,Repeat,Transcription,Transcription regulation,Zinc,	chain:LIM/homeobox protein Awh,DNA-binding region:Homeobox,domain:LIM zinc-binding 1,domain:LIM zinc-binding 2,modified residue,mutagenesis site,sequence conflict,splice variant,
40700	Autophagy-related 17(Atg17)		GO:0000045~autophagosome assembly,GO:0000422~mitophagy,GO:0001934~positive regulation of protein phosphorylation,GO:0006914~autophagy,GO:0006995~cellular response to nitrogen starvation,GO:0009267~cellular response to starvation,GO:0016236~macroautophagy,GO:0030242~pexophagy,GO:0032147~activation of protein kinase activity,GO:0035071~salivary gland cell autophagic cell death,GO:0035096~larval mid…	GO:0000407~pre-autophagosomal structure,GO:0034045~pre-autophagosomal structure membrane,GO:1990316~ATG1/ULK1 kinase complex,	GO:0019887~protein kinase regulator activity,GO:0019901~protein kinase binding,GO:0032947~protein complex scaffold,	IPR019460:Autophagy-related protein 11,				Coiled coil,Complete proteome,Reference proteome,
36661	CG10242 gene product from transcript CG10242-RA(Cyp6a23)	Secondary metabolites biosynthesis, transport, and catabolism,	GO:0055114~oxidation-reduction process,	GO:0005789~endoplasmic reticulum membrane,GO:0031090~organelle membrane,	GO:0004497~monooxygenase activity,GO:0005506~iron ion binding,GO:0016491~oxidoreductase activity,GO:0016705~oxidoreductase activity, acting on paired donors, with incorporation or reduction of molecular oxygen,GO:0020037~heme binding,	IPR001128:Cytochrome P450,IPR002401:Cytochrome P450, E-class, group I,IPR002402:Cytochrome P450, E-class, group II,IPR017972:Cytochrome P450, conserved site,				Complete proteome,Endoplasmic reticulum,Heme,Iron,Membrane,Metal-binding,Microsome,Monooxygenase,Oxidoreductase,Reference proteome,Signal,	chain:Probable cytochrome P450 6a23,metal ion-binding site:Iron (heme axial ligand),sequence conflict,
42017	CG10345 gene product from transcript CG10345-RA(CG10345)			GO:0016020~membrane,GO:0016021~integral component of membrane,		IPR002159:CD36 antigen,IPR005428:Adhesion molecule CD36,				Complete proteome,Membrane,Reference proteome,Transmembrane,Transmembrane helix,
38435	CG10357 gene product from transcript CG10357-RC(CG10357)		GO:0006629~lipid metabolic process,GO:0016042~lipid catabolic process,	GO:0005576~extracellular region,	GO:0016298~lipase activity,GO:0052689~carboxylic ester hydrolase activity,	IPR000734:Lipase,IPR013818:Lipase, N-terminal,				Complete proteome,Hydrolase,Reference proteome,Secreted,Signal,
39333	CG10361 gene product from transcript CG10361-RA(CG10361)		GO:0006520~cellular amino acid metabolic process,GO:0006567~threonine catabolic process,GO:0009058~biosynthetic process,	GO:0005739~mitochondrion,	GO:0008890~glycine C-acetyltransferase activity,GO:0030170~pyridoxal phosphate binding,	IPR001917:Aminotransferase, class-II, pyridoxal-phosphate binding site,IPR004839:Aminotransferase, class I/classII,IPR011282:2-amino-3-ketobutyrate coenzyme A ligase,IPR015421:Pyridoxal phosphate-dependent transferase, major region, subdomain 1,IPR015422:Pyridoxal phosphate-dependent transferase, major region, subdomain 2,IPR015424:Pyridoxal phosphate-dependent transferase,	dme00260:Glycine, serine and threonine metabolism,			Acyltransferase,Complete proteome,Proteomics identification,Reference proteome,Transferase,
32157	CG10362 gene product from transcript CG10362-RA(CG10362)		GO:0035556~intracellular signal transduction,	GO:0005622~intracellular,GO:0016021~integral component of membrane,	GO:0046872~metal ion binding,	IPR001478:PDZ domain,IPR002219:Protein kinase C-like, phorbol ester/diacylglycerol binding,			SM00109:C1,SM00228:PDZ,	Complete proteome,Membrane,Metal-binding,Reference proteome,Transmembrane,Transmembrane helix,Zinc,
43066	CG10562 gene product from transcript CG10562-RA(CG10562)					IPR004119:Protein of unknown function DUF227,IPR011009:Protein kinase-like domain,IPR015897:CHK kinase-like,			SM00587:CHK,	Complete proteome,Proteomics identification,Reference proteome,
36481	CG10814 gene product from transcript CG10814-RA(CG10814)		GO:0030431~sleep,GO:0055114~oxidation-reduction process,		GO:0008336~gamma-butyrobetaine dioxygenase activity,GO:0016491~oxidoreductase activity,	IPR003819:Taurine catabolism dioxygenase TauD/TfdA,IPR010376:Domain of unknown function, DUF971,	dme00310:Lysine degradation,			Complete proteome,Oxidoreductase,Reference proteome,
31736	CG10958 gene product from transcript CG10958-RA(CG10958)									Coiled coil,Complete proteome,Reference proteome,	chain:UPF0407 protein CG10958,compositionally biased region:Poly-Glu,
31824	CG10962 gene product from transcript CG10962-RB(CG10962)				GO:0016491~oxidoreductase activity,	IPR002347:Glucose/ribitol dehydrogenase,IPR016040:NAD(P)-binding domain,				Complete proteome,Oxidoreductase,Proteomics identification,Reference proteome,
33810	CG11034 gene product from transcript CG11034-RC(CG11034)		GO:0006508~proteolysis,		GO:0008236~serine-type peptidase activity,GO:0008239~dipeptidyl-peptidase activity,	IPR001375:Peptidase S9, prolyl oligopeptidase, catalytic domain,IPR002469:Peptidase S9B, dipeptidylpeptidase IV N-terminal,				Complete proteome,Reference proteome,Signal,
37278	CG11041 gene product from transcript CG11041-RB(CG11041)				GO:0005509~calcium ion binding,	IPR002048:EF-hand domain,IPR011992:EF-hand-like domain,IPR014837:EF-hand, Ca insensitive,			SM00054:EFh,	Complete proteome,Reference proteome,
35545	CG11211 gene product from transcript CG11211-RA(CG11211)				GO:0030246~carbohydrate binding,	IPR001304:C-type lectin,IPR016186:C-type lectin-like,IPR016187:C-type lectin fold,IPR018378:C-type lectin, conserved site,			SM00034:CLECT,	Complete proteome,Disulfide bond,Reference proteome,Signal,
40492	CG11241 gene product from transcript CG11241-RC(CG11241)	Amino acid transport and metabolism,		GO:0005739~mitochondrion,	GO:0008453~alanine-glyoxylate transaminase activity,GO:0008483~transaminase activity,GO:0030170~pyridoxal phosphate binding,GO:0042802~identical protein binding,	IPR005814:Aminotransferase class-III,IPR015421:Pyridoxal phosphate-dependent transferase, major region, subdomain 1,IPR015422:Pyridoxal phosphate-dependent transferase, major region, subdomain 2,IPR015424:Pyridoxal phosphate-dependent transferase,	dme00250:Alanine, aspartate and glutamate metabolism,dme00260:Glycine, serine and threonine metabolism,dme01100:Metabolic pathways,			Aminotransferase,Complete proteome,Proteomics identification,Pyridoxal phosphate,Reference proteome,Transferase,
31795	CG11265 gene product from transcript CG11265-RE(Trf4-1)	DNA replication, recombination, and repair,	GO:0007062~sister chromatid cohesion,GO:0043630~ncRNA polyadenylation involved in polyadenylation-dependent ncRNA catabolic process,		GO:0003887~DNA-directed DNA polymerase activity,GO:0004652~polynucleotide adenylyltransferase activity,GO:0016853~isomerase activity,	IPR002058:PAP/25A-associated,IPR002934:Nucleotidyl transferase domain,	dme03018:RNA degradation,			Complete proteome,Isomerase,Nucleotidyltransferase,Reference proteome,Transferase,
40474	CG11404 gene product from transcript CG11404-RA(CG11404)			GO:0016021~integral component of membrane,						Complete proteome,Membrane,Reference proteome,Signal,Transmembrane,Transmembrane helix,
31078	CG11409 gene product from transcript CG11409-RC(CG11409)									Coiled coil,Complete proteome,Reference proteome,Signal,
35971	CG11804 gene product from transcript CG11804-RD(ced-6)		GO:0016319~mushroom body development,GO:0016322~neuron remodeling,GO:0043277~apoptotic cell clearance,	GO:0005737~cytoplasm,	GO:0005515~protein binding,	IPR006020:Phosphotyrosine interaction domain,IPR011993:Pleckstrin homology-like domain,			SM00462:PTB,	Coiled coil,Complete proteome,Cytoplasm,Developmental protein,Phagocytosis,Phosphoprotein,Proteomics identification,Reference proteome,	chain:PTB domain-containing adapter protein ced-6,compositionally biased region:Poly-Gln,domain:PID,modified residue,
43037	CG11854 gene product from transcript CG11854-RB(CG11854)		GO:0007623~circadian rhythm,GO:0032504~multicellular organism reproduction,	GO:0005615~extracellular space,		IPR010562:Haemolymph juvenile hormone binding,			SM00700:JHBP,	Complete proteome,Proteomics identification,Reference proteome,Signal,
43463	CG11951 gene product from transcript CG11951-RA(CG11951)		GO:0006508~proteolysis,GO:0043171~peptide catabolic process,	GO:0005737~cytoplasm,GO:0005886~plasma membrane,	GO:0004177~aminopeptidase activity,GO:0008237~metallopeptidase activity,GO:0008270~zinc ion binding,GO:0042277~peptide binding,GO:0070006~metalloaminopeptidase activity,	IPR001930:Peptidase M1, alanine aminopeptidase/leukotriene A4 hydrolase,IPR014782:Peptidase M1, membrane alanine aminopeptidase, N-terminal,IPR024571:Domain of unknown function DUF3358,	dme00480:Glutathione metabolism,dme01100:Metabolic pathways,			Aminopeptidase,Complete proteome,Hydrolase,Protease,Reference proteome,Signal,
38021	CG1212 gene product from transcript CG1212-RD(p130CAS)		GO:0007016~cytoskeletal anchoring at plasma membrane,GO:0007414~axonal defasciculation,GO:0016337~single organismal cell-cell adhesion,GO:0030011~maintenance of cell polarity,	GO:0005623~cell,GO:0005925~focal adhesion,		IPR001452:Src homology-3 domain,IPR014928:Serine rich protein interaction,IPR021901:CAS family, DUF3513,			SM00326:SH3,	Complete proteome,Reference proteome,SH3 domain,
43182	CG12290 gene product from transcript CG12290-RB(CG12290)		GO:0001963~synaptic transmission, dopaminergic,GO:0007186~G-protein coupled receptor signaling pathway,	GO:0016021~integral component of membrane,	GO:0001588~dopamine neurotransmitter receptor activity, coupled via Gs,GO:0004930~G-protein coupled receptor activity,GO:0035240~dopamine binding,	IPR000276:G protein-coupled receptor, rhodopsin-like,IPR017452:GPCR, rhodopsin-like, 7TM,				Complete proteome,Membrane,Reference proteome,Transmembrane,Transmembrane helix,
50161	CG12483 gene product from transcript CG12483-RA(CG12483)									Complete proteome,Reference proteome,Signal,
38102	CG12502 gene product from transcript CG12502-RB(CG12502)			GO:0016021~integral component of membrane,		IPR018787:Protein of unknown function DUF2371, TMEM200,				Complete proteome,Membrane,Reference proteome,Transmembrane,Transmembrane helix,
39248	CG12522 gene product from transcript CG12522-RA(CG12522)									Complete proteome,Reference proteome,Signal,
38364	CG1271 gene product from transcript CG1271-RC(CG1271)	Energy production and conversion,	GO:0005975~carbohydrate metabolic process,	GO:0005737~cytoplasm,	GO:0004370~glycerol kinase activity,GO:0016301~kinase activity,GO:0016773~phosphotransferase activity, alcohol group as acceptor,	IPR018483:Carbohydrate kinase, FGGY, conserved site,IPR018484:Carbohydrate kinase, FGGY, N-terminal,IPR018485:Carbohydrate kinase, FGGY, C-terminal,		PIRSF000538:keto-sugar kinase,		Complete proteome,Kinase,Reference proteome,Signal,Transferase,
35630	CG12836 gene product from transcript CG12836-RC(CG12836)			GO:0016021~integral component of membrane,		IPR005334:Tctex-1,				Complete proteome,Membrane,Reference proteome,Transmembrane,Transmembrane helix,
50268	CG13038 gene product from transcript CG13038-RA(CG13038)									Complete proteome,Reference proteome,Signal,
35252	CG13077 gene product from transcript CG13077-RA(CG13077)		GO:0055114~oxidation-reduction process,	GO:0016021~integral component of membrane,		IPR006593:Cytochrome b561/ferric reductase transmembrane,			SM00665:B561,	Complete proteome,Electron transport,Membrane,Reference proteome,Transmembrane,Transmembrane helix,Transport,
34271	CG13113 gene product from transcript CG13113-RA(CG13113)		GO:0007306~eggshell chorion assembly,	GO:0042600~chorion,						Complete proteome,Reference proteome,Signal,
34272	CG13114 gene product from transcript CG13114-RB(CG13114)			GO:0042600~chorion,						Complete proteome,Reference proteome,Signal,
34288	CG13116 gene product from transcript CG13116-RA(CG13116)			GO:0016021~integral component of membrane,						Complete proteome,Membrane,Reference proteome,Transmembrane,Transmembrane helix,
36433	CG13323 gene product from transcript CG13323-RB(CG13323)									Complete proteome,Reference proteome,Signal,
37343	CG13437 gene product from transcript CG13437-RA(CG13437)			GO:0016021~integral component of membrane,						Complete proteome,Membrane,Reference proteome,Transmembrane,Transmembrane helix,
37885	CG13577 gene product from transcript CG13577-RB(CG13577)		GO:0022008~neurogenesis,							Complete proteome,Reference proteome,
42859	CG13607 gene product from transcript CG13607-RC(CG13607)			GO:0016021~integral component of membrane,						Complete proteome,Membrane,Reference proteome,Transmembrane,Transmembrane helix,
42924	CG13618 gene product from transcript CG13618-RA(CG13618)		GO:0007623~circadian rhythm,GO:0032504~multicellular organism reproduction,	GO:0005615~extracellular space,		IPR010562:Haemolymph juvenile hormone binding,			SM00700:JHBP,	Complete proteome,Reference proteome,Signal,
38588	CG13704 gene product from transcript CG13704-RA(CG13704)			GO:0016021~integral component of membrane,						Complete proteome,Membrane,Reference proteome,Signal,Transmembrane,Transmembrane helix,
39927	CG13724 gene product from transcript CG13724-RA(CG13724)			GO:0016021~integral component of membrane,						Coiled coil,Complete proteome,Membrane,Reference proteome,Signal,Transmembrane,Transmembrane helix,
50061	CG13841 gene product from transcript CG13841-RA(CG13841)									Complete proteome,Reference proteome,Signal,
38036	CG13877 gene product from transcript CG13877-RB(CG13877)									Complete proteome,Reference proteome,Signal,
38120	CG13912 gene product from transcript CG13912-RA(CG13912)									Complete proteome,Reference proteome,Signal,
38203	CG13920 gene product from transcript CG13920-RC(CG13920)			GO:0016021~integral component of membrane,						Complete proteome,Membrane,Proteomics identification,Reference proteome,Transmembrane,Transmembrane helix,
33763	CG14022 gene product from transcript CG14022-RA(CG14022)				GO:0003998~acylphosphatase activity,	IPR001792:Acylphosphatase-like,IPR020456:Acylphosphatase,	dme00620:Pyruvate metabolism,			Complete proteome,Hydrolase,Reference proteome,
36043	CG1407 gene product from transcript CG1407-RB(CG1407)	General function prediction only,	GO:0018345~protein palmitoylation,	GO:0005886~plasma membrane,GO:0016021~integral component of membrane,	GO:0008270~zinc ion binding,GO:0019706~protein-cysteine S-palmitoyltransferase activity,	IPR001594:Zinc finger, DHHC-type, palmitoyltransferase,				Acyltransferase,Complete proteome,Membrane,Proteomics identification,Reference proteome,Transferase,Transmembrane,Transmembrane helix,
39463	CG14120 gene product from transcript CG14120-RA(CG14120)				GO:0003676~nucleic acid binding,GO:0016787~hydrolase activity,GO:0046872~metal ion binding,	IPR001604:DNA/RNA non-specific endonuclease,IPR020821:Extracellular Endonuclease, subunit A,			SM00477:NUC,SM00892:SM00892,	Complete proteome,Hydrolase,Proteomics identification,Reference proteome,Signal,
32978	CG14227 gene product from transcript CG14227-RB(CG14227)		GO:0006508~proteolysis,		GO:0004252~serine-type endopeptidase activity,GO:0016787~hydrolase activity,	IPR001254:Peptidase S1,IPR001314:Peptidase S1A, chymotrypsin-type,IPR009003:Trypsin-like cysteine/serine peptidase domain,IPR018114:Peptidase S1, trypsin family, active site,			SM00020:Tryp_SPc,	Complete proteome,Disulfide bond,Hydrolase,Reference proteome,Signal,
41716	CG14357 gene product from transcript CG14357-RB(CG14357)									Complete proteome,Reference proteome,
32407	CG14408 gene product from transcript CG14408-RH(CG14408)		GO:0035556~intracellular signal transduction,GO:0061099~negative regulation of protein tyrosine kinase activity,	GO:0005622~intracellular,GO:0005737~cytoplasm,	GO:0004860~protein kinase inhibitor activity,GO:0017124~SH3 domain binding,	IPR007940:SH3-binding 5,				Coiled coil,Complete proteome,Reference proteome,
31595	CG14443 gene product from transcript CG14443-RB(CG14443)		GO:0010501~RNA secondary structure unwinding,		GO:0003676~nucleic acid binding,GO:0003723~RNA binding,GO:0004004~ATP-dependent RNA helicase activity,GO:0004386~helicase activity,GO:0005524~ATP binding,	IPR001650:Helicase, C-terminal,IPR011545:DNA/RNA helicase, DEAD/DEAH box type, N-terminal,IPR014001:Helicase, superfamily 1/2, ATP-binding domain,IPR014014:RNA helicase, DEAD-box type, Q motif,IPR027417:P-loop containing nucleoside triphosphate hydrolase,			SM00487:DEXDc,SM00490:HELICc,	ATP-binding,Complete proteome,Helicase,Hydrolase,Nucleotide-binding,Reference proteome,RNA-binding,	chain:Putative ATP-dependent RNA helicase CG14443,domain:Helicase ATP-binding,domain:Helicase C-terminal,nucleotide phosphate-binding region:ATP,short sequence motif:DEAD box,short sequence motif:Q motif,
37087	CG14500 gene product from transcript CG14500-RA(CG14500)				GO:0030246~carbohydrate binding,	IPR001304:C-type lectin,IPR016186:C-type lectin-like,IPR016187:C-type lectin fold,			SM00034:CLECT,	Complete proteome,Reference proteome,Signal,
41278	CG14683 gene product from transcript CG14683-RA(CG14683)		GO:0070475~rRNA base methylation,		GO:0008168~methyltransferase activity,GO:0071424~rRNA (cytosine-N4-)-methyltransferase activity,	IPR002903:Ribosomal RNA small subunit methyltransferase H,IPR023397:S-adenosyl-L-methionine-dependent methyltransferase, MraW, recognition domain,		PIRSF004486:S-adenosyl-L-methionine dependent methyltransferase, MraW type,		Complete proteome,Methyltransferase,Reference proteome,S-adenosyl-L-methionine,Transferase,	binding site:S-adenosyl-L-methionine,binding site:S-adenosyl-L-methionine; via amide nitrogen,chain:Putative S-adenosyl-L-methionine- dependent methyltransferase CG14683,region of interest:S-adenosyl-L-methionine binding,
41275	CG14688 gene product from transcript CG14688-RB(CG14688)		GO:0001561~fatty acid alpha-oxidation,	GO:0005777~peroxisome,	GO:0048244~phytanoyl-CoA dioxygenase activity,	IPR008775:Phytanoyl-CoA dioxygenase,				Complete proteome,Oxidoreductase,Reference proteome,
41383	CG14708 gene product from transcript CG14708-RA(CG14708)									Complete proteome,Reference proteome,
41415	CG14720 gene product from transcript CG14720-RA(CG14720)					IPR006631:Protein of unknown function DM4/12,			SM00718:DM4_12,	Complete proteome,Reference proteome,
35862	CG14745 gene product from transcript CG14745-RA(PGRP-SC2)		GO:0006955~immune response,GO:0009253~peptidoglycan catabolic process,GO:0045087~innate immune response,GO:0045824~negative regulation of innate immune response,	GO:0005576~extracellular region,	GO:0008270~zinc ion binding,GO:0008745~N-acetylmuramoyl-L-alanine amidase activity,GO:0042834~peptidoglycan binding,	IPR002502:N-acetylmuramoyl-L-alanine amidase domain,IPR006619:Peptidoglycan recognition protein family domain, metazoa/bacteria,IPR015510:Peptidoglycan recognition protein,IPR017331:Peptidoglycan recognition protein, PGRP-S,		PIRSF037945:peptidoglycan recognition protein, PGRP-S type,	SM00644:Ami_2,SM00701:PGRP,	Complete proteome,Disulfide bond,Hydrolase,Immunity,Innate immunity,Metal-binding,Reference proteome,Secreted,Signal,Zinc,	chain:Peptidoglycan-recognition protein SC2,disulfide bond,metal ion-binding site:Zinc,sequence variant,signal peptide,
38386	CG14957 gene product from transcript CG14957-RA(CG14957)		GO:0006030~chitin metabolic process,	GO:0005576~extracellular region,	GO:0008061~chitin binding,	IPR002557:Chitin binding domain,				Complete proteome,Reference proteome,Signal,
37248	CG15120 gene product from transcript CG15120-RA(CG15120)		GO:0019233~sensory perception of pain,GO:0060548~negative regulation of cell death,	GO:0005634~nucleus,GO:0005829~cytosol,	GO:0031625~ubiquitin protein ligase binding,	IPR016024:Armadillo-type fold,IPR019399:Parkin co-regulated protein,				Complete proteome,Reference proteome,
40797	CG15186 gene product from transcript CG15186-RI(CG15186)									Coiled coil,Complete proteome,Reference proteome,
32052	CG15202 gene product from transcript CG15202-RB(CG15202)		GO:0051607~defense response to virus,	GO:0005615~extracellular space,					SM01318:SM01318,	Complete proteome,Reference proteome,Signal,
34897	CG15261 gene product from transcript CG15261-RB(UK114)		GO:0006457~protein folding,			IPR006056:Enamine/imine deaminase YjgF-like,IPR006175:YjgF/Yer057p/UK114 family,IPR013813:Endoribonuclease L-PSP/chorismate mutase-like,IPR019897:YjgF-like protein, conserved site,				Chaperone,Complete proteome,Reference proteome,
43689	CG1544 gene product from transcript CG1544-RA(CG1544)		GO:0006091~generation of precursor metabolites and energy,GO:0006096~glycolytic process,GO:0006099~tricarboxylic acid cycle,	GO:0005739~mitochondrion,GO:0031966~mitochondrial membrane,GO:0045252~oxoglutarate dehydrogenase complex,	GO:0004591~oxoglutarate dehydrogenase (succinyl-transferring) activity,GO:0030976~thiamine pyrophosphate binding,	IPR001017:Dehydrogenase, E1 component,IPR005475:Transketolase-like, pyrimidine-binding domain,IPR011603:2-oxoglutarate dehydrogenase, E1 component,		PIRSF000157:2-oxoglutarate dehydrogenase, E1 component,	SM00861:SM00861,	Complete proteome,Glycolysis,Mitochondrion,Oxidoreductase,Reference proteome,Thiamine pyrophosphate,Transit peptide,	chain:Probable 2-oxoglutarate dehydrogenase E1 component DHKTD1 homolog, mitochondrial,sequence conflict,transit peptide:Mitochondrion,
33681	CG15628 gene product from transcript CG15628-RB(CG15628)				GO:0008080~N-acetyltransferase activity,	IPR000182:GNAT domain,IPR013653:FR47-like,IPR016181:Acyl-CoA N-acyltransferase,				Acyltransferase,Complete proteome,Reference proteome,Transferase,
31747	CG1583 gene product from transcript CG1583-RC(GIIIspla2)		GO:0006644~phospholipid metabolic process,GO:0050482~arachidonic acid secretion,	GO:0005576~extracellular region,	GO:0004623~phospholipase A2 activity,	IPR016090:Phospholipase A2 domain,	dme00564:Glycerophospholipid metabolism,dme00565:Ether lipid metabolism,dme00590:Arachidonic acid metabolism,dme00591:Linoleic acid metabolism,dme00592:alpha-Linolenic acid metabolism,dme01100:Metabolic pathways,			Complete proteome,Hydrolase,Reference proteome,Secreted,Signal,
42443	CG15923 gene product from transcript CG15923-RB(CG15923)		GO:0010826~negative regulation of centrosome duplication,GO:0042384~cilium assembly,GO:0051726~regulation of cell cycle,	GO:0016021~integral component of membrane,GO:0036038~MKS complex,		IPR019170:Meckelin,				Complete proteome,Membrane,Reference proteome,Signal,Transmembrane,Transmembrane helix,
33589	CG16704 gene product from transcript CG16704-RB(CG16704)				GO:0004867~serine-type endopeptidase inhibitor activity,	IPR002223:Proteinase inhibitor I2, Kunitz metazoa,IPR020901:Proteinase inhibitor I2, Kunitz, conserved site,			SM00131:KU,	Complete proteome,Reference proteome,Signal,
34517	CG16743 gene product from transcript CG16743-RB(CG16743)									Complete proteome,Proteomics identification,Reference proteome,Signal,
34739	CG16825 gene product from transcript CG16825-RB(CG16825)			GO:0016021~integral component of membrane,						Complete proteome,Membrane,Reference proteome,Transmembrane,Transmembrane helix,
37276	CG16898 gene product from transcript CG16898-RA(CG16898)					IPR004119:Protein of unknown function DUF227,IPR011009:Protein kinase-like domain,IPR015897:CHK kinase-like,			SM00587:CHK,	Complete proteome,Reference proteome,
50205	CG16926 gene product from transcript CG16926-RB(CG16926)		GO:0030431~sleep,							Complete proteome,Reference proteome,
43279	CG17991 gene product from transcript CG17991-RA(CG17991)		GO:0000209~protein polyubiquitination,	GO:0005741~mitochondrial outer membrane,GO:0005789~endoplasmic reticulum membrane,GO:0016021~integral component of membrane,	GO:0004842~ubiquitin-protein transferase activity,GO:0008270~zinc ion binding,	IPR011016:Zinc finger, RING-CH-type,IPR013083:Zinc finger, RING/FYVE/PHD-type,			SM00744:RINGv,	Complete proteome,Membrane,Metal-binding,Reference proteome,Transmembrane,Transmembrane helix,Zinc,Zinc-finger,
3771779	CG18003 gene product from transcript CG18003-RB(CG18003)		GO:0055114~oxidation-reduction process,	GO:0005777~peroxisome,	GO:0010181~FMN binding,GO:0016491~oxidoreductase activity,GO:0052852~very-long-chain-(S)-2-hydroxy-acid oxidase activity,GO:0052853~long-chain-(S)-2-hydroxy-long-chain-acid oxidase activity,GO:0052854~medium-chain-(S)-2-hydroxy-acid oxidase activity,	IPR000262:FMN-dependent dehydrogenase,IPR008259:FMN-dependent alpha-hydroxy acid dehydrogenase, active site,IPR012133:Alpha-hydroxy acid dehydrogenase, FMN-dependent,IPR013785:Aldolase-type TIM barrel,	dme00630:Glyoxylate and dicarboxylate metabolism,dme01100:Metabolic pathways,dme01130:Biosynthesis of antibiotics,dme01200:Carbon metabolism,dme04146:Peroxisome,	PIRSF000138:alpha-hydroxy acid dehydrogenase, FMN-dependent,		Complete proteome,Oxidoreductase,Proteomics identification,Reference proteome,
36567	CG18327 gene product from transcript CG18327-RA(CG18327)		GO:0006412~translation,GO:0006810~transport,	GO:0016021~integral component of membrane,	GO:0003735~structural constituent of ribosome,	IPR018108:Mitochondrial substrate/solute carrier,IPR023395:Mitochondrial carrier domain,				Complete proteome,Membrane,Reference proteome,Transmembrane,Transmembrane helix,Transport,
36556	CG18371 gene product from transcript CG18371-RA(CG18371)				GO:0003998~acylphosphatase activity,	IPR001792:Acylphosphatase-like,IPR017968:Acylphosphatase, conserved site,IPR020456:Acylphosphatase,	dme00620:Pyruvate metabolism,			Complete proteome,Hydrolase,Reference proteome,
41452	CG18547 gene product from transcript CG18547-RA(CG18547)		GO:0055114~oxidation-reduction process,		GO:0016491~oxidoreductase activity,	IPR001395:Aldo/keto reductase,IPR020471:Aldo/keto reductase subgroup,IPR023210:NADP-dependent oxidoreductase domain,				Complete proteome,Oxidoreductase,Proteomics identification,Reference proteome,
33439	CG18559 gene product from transcript CG18559-RA(Cyp309a2)	Secondary metabolites biosynthesis, transport, and catabolism,	GO:0055114~oxidation-reduction process,	GO:0005789~endoplasmic reticulum membrane,GO:0031090~organelle membrane,	GO:0004497~monooxygenase activity,GO:0005506~iron ion binding,GO:0016491~oxidoreductase activity,GO:0016705~oxidoreductase activity, acting on paired donors, with incorporation or reduction of molecular oxygen,GO:0020037~heme binding,	IPR001128:Cytochrome P450,IPR002401:Cytochrome P450, E-class, group I,IPR017972:Cytochrome P450, conserved site,				Complete proteome,Endoplasmic reticulum,Heme,Iron,Membrane,Metal-binding,Microsome,Monooxygenase,Oxidoreductase,Reference proteome,	chain:Probable cytochrome P450 309a2,metal ion-binding site:Iron (heme axial ligand),sequence conflict,
43800	CG1909 gene product from transcript CG1909-RA(CG1909)		GO:0007271~synaptic transmission, cholinergic,GO:0010906~regulation of glucose metabolic process,		GO:0008270~zinc ion binding,GO:0033130~acetylcholine receptor binding,GO:0043495~protein anchor,	IPR001841:Zinc finger, RING-type,IPR011990:Tetratricopeptide-like helical,IPR013026:Tetratricopeptide repeat-containing domain,IPR013083:Zinc finger, RING/FYVE/PHD-type,IPR019568:Rapsyn, myristoylation/linker region, N-terminal,				Complete proteome,Reference proteome,
40713	CG2082 gene product from transcript CG2082-RO(CG2082)		GO:0007165~signal transduction,	GO:0005737~cytoplasm,		IPR004142:Ndr,				Complete proteome,Proteomics identification,Reference proteome,
36056	CG2269 gene product from transcript CG2269-RD(CG2269)									Complete proteome,Proteomics identification,Reference proteome,Signal,
40616	CG2530 gene product from transcript CG2530-RC(corto)		GO:0006342~chromatin silencing,GO:0006351~transcription, DNA-templated,GO:0007076~mitotic chromosome condensation,GO:0007474~imaginal disc-derived wing vein specification,GO:0010468~regulation of gene expression,GO:0045433~male courtship behavior, veined wing generated song production,GO:0051301~cell division,GO:0060429~epithelium development,	GO:0005634~nucleus,GO:0005700~polytene chromosome,GO:0005737~cytoplasm,GO:0005813~centrosome,GO:0035098~ESC/E(Z) complex,GO:0035102~PRC1 complex,	GO:0003677~DNA binding,GO:0003682~chromatin binding,GO:0005515~protein binding,GO:0042802~identical protein binding,GO:0042803~protein homodimerization activity,					Cell cycle,Cell division,Chromosome,Coiled coil,Complete proteome,Cytoplasm,Cytoskeleton,DNA-binding,Mitosis,Nucleus,Reference proteome,Transcription,Transcription regulation,	chain:Centrosomal and chromosomal factor,compositionally biased region:Ala-rich,compositionally biased region:Gln-rich,compositionally biased region:Poly-Ala,compositionally biased region:Poly-Gln,compositionally biased region:Poly-Gly,compositionally biased region:Poly-Pro,compositionally biased region:Poly-Ser,sequence conflict,
33595	CG2816 gene product from transcript CG2816-RB(CG2816)				GO:0004867~serine-type endopeptidase inhibitor activity,	IPR002223:Proteinase inhibitor I2, Kunitz metazoa,IPR020901:Proteinase inhibitor I2, Kunitz, conserved site,			SM00131:KU,	Complete proteome,Reference proteome,Signal,
246525	CG30281 gene product from transcript CG30281-RA(CG30281)		GO:0007186~G-protein coupled receptor signaling pathway,	GO:0016020~membrane,	GO:0001664~G-protein coupled receptor binding,GO:0008061~chitin binding,	IPR002181:Fibrinogen, alpha/beta/gamma chain, C-terminal globular domain,IPR014715:Fibrinogen, alpha/beta/gamma chain, C-terminal globular, subdomain 2,IPR014716:Fibrinogen, alpha/beta/gamma chain, C-terminal globular, subdomain 1,IPR020837:Fibrinogen, conserved site,			SM00186:FBG,	Coiled coil,Complete proteome,Disulfide bond,Reference proteome,Signal,
33695	CG3036 gene product from transcript CG3036-RA(CG3036)		GO:0006820~anion transport,GO:0055085~transmembrane transport,	GO:0005886~plasma membrane,GO:0016021~integral component of membrane,	GO:0022857~transmembrane transporter activity,	IPR011701:Major facilitator superfamily,IPR020846:Major facilitator superfamily domain,				Complete proteome,Membrane,Proteomics identification,Reference proteome,Transmembrane,Transmembrane helix,
39115	CG3088 gene product from transcript CG3088-RA(CG3088)		GO:0006508~proteolysis,		GO:0004252~serine-type endopeptidase activity,GO:0016787~hydrolase activity,	IPR001254:Peptidase S1,IPR001314:Peptidase S1A, chymotrypsin-type,IPR009003:Trypsin-like cysteine/serine peptidase domain,			SM00020:Tryp_SPc,	Complete proteome,Hydrolase,Reference proteome,Signal,
43244	CG31075 gene product from transcript CG31075-RA(CG31075)		GO:0006090~pyruvate metabolic process,GO:0055114~oxidation-reduction process,	GO:0005759~mitochondrial matrix,	GO:0004029~aldehyde dehydrogenase (NAD) activity,	IPR015590:Aldehyde dehydrogenase domain,IPR016160:Aldehyde dehydrogenase, conserved site,IPR016161:Aldehyde/histidinol dehydrogenase,IPR016162:Aldehyde dehydrogenase, N-terminal,IPR016163:Aldehyde dehydrogenase, C-terminal,	dme00010:Glycolysis / Gluconeogenesis,dme00053:Ascorbate and aldarate metabolism,dme00071:Fatty acid degradation,dme00280:Valine, leucine and isoleucine degradation,dme00310:Lysine degradation,dme00330:Arginine and proline metabolism,dme00340:Histidine metabolism,dme00380:Tryptophan metabolism,dme00410:beta-Alanine metabolism,dme00561:Glycerolipid metabolism,dme00620:Pyruvate metabolism,dme01100:…			Complete proteome,Oxidoreductase,Proteomics identification,Reference proteome,
318788	CG31533 gene product from transcript CG31533-RA(CG31533)									Complete proteome,Reference proteome,
318882	CG31681 gene product from transcript CG31681-RA(CG31681)		GO:0006508~proteolysis,	GO:0005737~cytoplasm,	GO:0004252~serine-type endopeptidase activity,	IPR001254:Peptidase S1,IPR001314:Peptidase S1A, chymotrypsin-type,IPR009003:Trypsin-like cysteine/serine peptidase domain,IPR018114:Peptidase S1, trypsin family, active site,			SM00020:Tryp_SPc,	Complete proteome,Disulfide bond,Hydrolase,Protease,Reference proteome,Serine protease,Signal,
318934	CG31769 gene product from transcript CG31769-RA(CG31769)									Complete proteome,Reference proteome,Signal,
261616	CG31778 gene product from transcript CG31778-RA(CG31778)				GO:0004867~serine-type endopeptidase inhibitor activity,	IPR002223:Proteinase inhibitor I2, Kunitz metazoa,				Complete proteome,Reference proteome,Signal,
34490	CG31869 gene product from transcript CG31869-RC(CG31869)			GO:0016021~integral component of membrane,		IPR001007:von Willebrand factor, type C,			SM00214:VWC,	Complete proteome,Membrane,Reference proteome,Transmembrane,Transmembrane helix,
326175	CG31928 gene product from transcript CG31928-RB(CG31928)		GO:0006508~proteolysis,GO:0030163~protein catabolic process,	GO:0005615~extracellular space,GO:0005764~lysosome,GO:0042600~chorion,	GO:0004190~aspartic-type endopeptidase activity,	IPR001461:Peptidase A1,IPR021109:Aspartic peptidase,				Complete proteome,Hydrolase,Reference proteome,Signal,
319047	CG31960 gene product from transcript CG31960-RA(CG31960)				GO:0005509~calcium ion binding,	IPR002048:EF-hand domain,IPR011992:EF-hand-like domain,IPR018247:EF-Hand 1, calcium-binding site,			SM00054:EFh,	Complete proteome,Reference proteome,
317926	CG32225 gene product from transcript CG32225-RA(CG32225)			GO:0016020~membrane,GO:0016021~integral component of membrane,		IPR002000:Lysosome-associated membrane glycoprotein,				Complete proteome,Membrane,Proteomics identification,Reference proteome,Transmembrane,Transmembrane helix,
40310	CG32432 gene product from transcript CG32432-RB(CG32432)			GO:0016021~integral component of membrane,		IPR000859:CUB domain,IPR002172:Low-density lipoprotein (LDL) receptor class A repeat,IPR023415:Low-density lipoprotein (LDL) receptor class A, conserved site,			SM00042:CUB,SM00192:LDLa,	Complete proteome,Disulfide bond,Membrane,Reference proteome,Transmembrane,Transmembrane helix,
33085	CG32512 gene product from transcript CG32512-RD(CG32512)			GO:0016021~integral component of membrane,		IPR025423:Domain of unknown function DUF4149,				Coiled coil,Complete proteome,Membrane,Proteomics identification,Reference proteome,Transmembrane,Transmembrane helix,
318071	CG32523 gene product from transcript CG32523-RA(CG32523)		GO:0006508~proteolysis,		GO:0004252~serine-type endopeptidase activity,	IPR001254:Peptidase S1,IPR001314:Peptidase S1A, chymotrypsin-type,IPR009003:Trypsin-like cysteine/serine peptidase domain,IPR018114:Peptidase S1, trypsin family, active site,			SM00020:Tryp_SPc,	Complete proteome,Disulfide bond,Hydrolase,Reference proteome,Signal,
35577	CG3269 gene product from transcript CG3269-RA(Rab2)		GO:0016192~vesicle-mediated transport,GO:0019233~sensory perception of pain,GO:0032482~Rab protein signal transduction,	GO:0005794~Golgi apparatus,GO:0005886~plasma membrane,GO:0031982~vesicle,GO:0043025~neuronal cell body,	GO:0003924~GTPase activity,GO:0005515~protein binding,GO:0005525~GTP binding,	IPR001806:Small GTPase superfamily,IPR005225:Small GTP-binding protein domain,IPR027417:P-loop containing nucleoside triphosphate hydrolase,				3D-structure,Complete proteome,Proteomics identification,Reference proteome,
318246	CG32850 gene product from transcript CG32850-RB(CG32850)		GO:0042787~protein ubiquitination involved in ubiquitin-dependent protein catabolic process,GO:0051865~protein autoubiquitination,	GO:0000151~ubiquitin ligase complex,	GO:0004842~ubiquitin-protein transferase activity,GO:0008270~zinc ion binding,	IPR001841:Zinc finger, RING-type,IPR013083:Zinc finger, RING/FYVE/PHD-type,			SM00184:RING,	Complete proteome,Reference proteome,
42528	CG3301 gene product from transcript CG3301-RB(CG3301)				GO:0016491~oxidoreductase activity,	IPR002347:Glucose/ribitol dehydrogenase,IPR016040:NAD(P)-binding domain,				Complete proteome,Oxidoreductase,Proteomics identification,Reference proteome,
36342	CG33012 gene product from transcript CG33012-RC(CG33012)			GO:0016021~integral component of membrane,		IPR007484:Peptidase M28,				Complete proteome,Membrane,Reference proteome,Transmembrane,Transmembrane helix,
2769006	CG33234 gene product from transcript CG33234-RD(CG33234)		GO:0055085~transmembrane transport,	GO:0005887~integral component of plasma membrane,GO:0016021~integral component of membrane,	GO:0008514~organic anion transmembrane transporter activity,	IPR011701:Major facilitator superfamily,IPR020846:Major facilitator superfamily domain,				Complete proteome,Membrane,Reference proteome,Transmembrane,Transmembrane helix,
2768683	CG33341 gene product from transcript CG33341-RA(CG33341)					IPR006631:Protein of unknown function DM4/12,			SM00718:DM4_12,	Complete proteome,Reference proteome,
2768851	CG33453 gene product from transcript CG33453-RB(CG33453)					IPR010512:Protein of unknown function DUF1091,			SM00697:DM8,	Complete proteome,Reference proteome,Signal,
2768686	CG33494 gene product from transcript CG33494-RB(CG33494)									Complete proteome,Reference proteome,Signal,
41759	CG3360 gene product from transcript CG3360-RA(Cyp313a1)	Secondary metabolites biosynthesis, transport, and catabolism,	GO:0055114~oxidation-reduction process,	GO:0005789~endoplasmic reticulum membrane,GO:0031090~organelle membrane,	GO:0004497~monooxygenase activity,GO:0005506~iron ion binding,GO:0016705~oxidoreductase activity, acting on paired donors, with incorporation or reduction of molecular oxygen,GO:0020037~heme binding,	IPR001128:Cytochrome P450,IPR002401:Cytochrome P450, E-class, group I,				Complete proteome,Endoplasmic reticulum,Heme,Iron,Membrane,Metal-binding,Microsome,Monooxygenase,Oxidoreductase,Reference proteome,	chain:Probable cytochrome P450 313a1,metal ion-binding site:Iron (heme axial ligand),
3885637	CG33993 gene product from transcript CG33993-RA(CG33993)					IPR000980:SH2 domain,			SM00252:SH2,	Complete proteome,Reference proteome,
31945	CG34104 gene product from transcript CG34104-RB(RhoU)		GO:0007264~small GTPase mediated signal transduction,	GO:0005622~intracellular,	GO:0003924~GTPase activity,GO:0005525~GTP binding,	IPR001806:Small GTPase superfamily,IPR005225:Small GTP-binding protein domain,IPR027417:P-loop containing nucleoside triphosphate hydrolase,				Complete proteome,Reference proteome,
318566	CG34133 gene product from transcript CG34133-RC(CG34133)					IPR001680:WD40 repeat,IPR015943:WD40/YVTN repeat-like-containing domain,IPR017986:WD40-repeat-containing domain,IPR020472:G-protein beta WD-40 repeat,			SM00320:WD40,	Complete proteome,Proteomics identification,Reference proteome,
5740544	CG34387 gene product from transcript CG34387-RF(futsch)		GO:0000226~microtubule cytoskeleton organization,GO:0007017~microtubule-based process,GO:0007399~nervous system development,GO:0007409~axonogenesis,GO:0007528~neuromuscular junction development,GO:0008088~axo-dendritic transport,GO:0008355~olfactory learning,GO:0008582~regulation of synaptic growth at neuromuscular junction,GO:0043524~negative regulation of neuron apoptotic process,GO:0048749~com…	GO:0005737~cytoplasm,GO:0005874~microtubule,GO:0005875~microtubule associated complex,GO:0015630~microtubule cytoskeleton,GO:0030424~axon,GO:0030425~dendrite,GO:0043025~neuronal cell body,	GO:0005515~protein binding,GO:0008017~microtubule binding,GO:0019900~kinase binding,	IPR001279:Beta-lactamase-like,IPR009603:Microtubule associated protein Futsch,IPR010918:AIR synthase-related protein, C-terminal domain,IPR026074:Microtubule associated protein 1,				Coiled coil,Complete proteome,Cytoplasm,Cytoskeleton,Developmental protein,Microtubule,Phosphoprotein,Proteomics identification,Reference proteome,Repeat,	chain:Microtubule-associated protein futsch,modified residue,region of interest:53 X approximate repeat,repeat:1,repeat:10,repeat:11,repeat:12,repeat:13,repeat:14,repeat:15,repeat:16,repeat:17,repeat:18,repeat:19,repeat:2,repeat:20,repeat:21,repeat:22,repeat:23,repeat:24,repeat:25,repeat:26,repeat:27,repeat:28,repeat:29,repeat:3,repeat:30,repeat:31,repeat:32,repeat:33,repeat:34,repeat:35,repeat:3…
33534	CG34393 gene product from transcript CG34393-RA(CG34393)		GO:0007264~small GTPase mediated signal transduction,GO:0046579~positive regulation of Ras protein signal transduction,	GO:0005622~intracellular,	GO:0005088~Ras guanyl-nucleotide exchange factor activity,	IPR000651:Ras-like guanine nucleotide exchange factor, N-terminal,IPR001895:Guanine-nucleotide dissociation stimulator CDC25,IPR023578:Ras guanine nucleotide exchange factor, domain,			SM00147:RasGEF,	Complete proteome,Reference proteome,
50356	CG34401 gene product from transcript CG34401-RB(CG34401)		GO:0019233~sensory perception of pain,		GO:0008270~zinc ion binding,	IPR007527:Zinc finger, SWIM-type,				Coiled coil,Complete proteome,Proteomics identification,Reference proteome,
33421	CG3609 gene product from transcript CG3609-RA(CG3609)		GO:0055114~oxidation-reduction process,		GO:0016491~oxidoreductase activity,	IPR000683:Oxidoreductase, N-terminal,IPR004104:Oxidoreductase, C-terminal,IPR016040:NAD(P)-binding domain,	dme00040:Pentose and glucuronate interconversions,dme00980:Metabolism of xenobiotics by cytochrome P450,			Complete proteome,Oxidoreductase,Proteomics identification,Reference proteome,
39580	CG3868 gene product from transcript CG3868-RA(CG3868)			GO:0005615~extracellular space,						Complete proteome,Reference proteome,Signal,
49580	CG3953 gene product from transcript CG3953-RA(Invadolysin)		GO:0006338~chromatin remodeling,GO:0007052~mitotic spindle organization,GO:0007076~mitotic chromosome condensation,GO:0007100~mitotic centrosome separation,GO:0007155~cell adhesion,GO:0007420~brain development,GO:0007444~imaginal disc development,GO:0008354~germ cell migration,GO:0008406~gonad development,GO:0019915~lipid storage,GO:0022900~electron transport chain,GO:0045842~positive regulation …	GO:0005737~cytoplasm,GO:0016020~membrane,GO:0031252~cell leading edge,	GO:0004222~metalloendopeptidase activity,GO:0008233~peptidase activity,GO:0046872~metal ion binding,	IPR001577:Peptidase M8, leishmanolysin,				Cell cycle,Cell division,Complete proteome,Cytoplasm,Disulfide bond,Hydrolase,Metal-binding,Metalloprotease,Mitosis,Protease,Reference proteome,Zinc,	chain:Leishmanolysin-like peptidase,disulfide bond,glycosylation site:N-linked (GlcNAc...),metal ion-binding site:Zinc; catalytic,
41253	CG3999 gene product from transcript CG3999-RA(CG3999)		GO:0006546~glycine catabolic process,GO:0019464~glycine decarboxylation via glycine cleavage system,GO:0055114~oxidation-reduction process,	GO:0005739~mitochondrion,GO:0005960~glycine cleavage complex,	GO:0004375~glycine dehydrogenase (decarboxylating) activity,GO:0016594~glycine binding,	IPR003437:Glycine cleavage system P protein, homodimeric,IPR015421:Pyridoxal phosphate-dependent transferase, major region, subdomain 1,IPR015424:Pyridoxal phosphate-dependent transferase,IPR020581:Glycine cleavage system P protein,	dme00260:Glycine, serine and threonine metabolism,dme00630:Glyoxylate and dicarboxylate metabolism,dme01100:Metabolic pathways,dme01130:Biosynthesis of antibiotics,dme01200:Carbon metabolism,			Complete proteome,Oxidoreductase,Proteomics identification,Pyridoxal phosphate,Reference proteome,
40037	CG4120 gene product from transcript CG4120-RB(Cyp12c1)	Secondary metabolites biosynthesis, transport, and catabolism,	GO:0055114~oxidation-reduction process,	GO:0031966~mitochondrial membrane,	GO:0004497~monooxygenase activity,GO:0005506~iron ion binding,GO:0016705~oxidoreductase activity, acting on paired donors, with incorporation or reduction of molecular oxygen,GO:0020037~heme binding,	IPR001128:Cytochrome P450,IPR002401:Cytochrome P450, E-class, group I,IPR017972:Cytochrome P450, conserved site,				Complete proteome,Heme,Iron,Membrane,Metal-binding,Mitochondrion,Monooxygenase,Oxidoreductase,Reference proteome,Transit peptide,	chain:Probable cytochrome P450 12c1, mitochondrial,metal ion-binding site:Iron (heme axial ligand),transit peptide:Mitochondrion,
33209	CG4213 gene product from transcript CG4213-RA(CG4213)									Coiled coil,Complete proteome,Reference proteome,
36473	CG42319 gene product from transcript CG42319-RE(CG42319)					IPR001478:PDZ domain,			SM00228:PDZ,	Complete proteome,Reference proteome,
42455	CG42322 gene product from transcript CG42322-RN(CG42322)	Carbohydrate transport and metabolism / Amino acid transport and metabolism / General function prediction only,		GO:0016021~integral component of membrane,		IPR026505:Solute carrier family 35 member F3/F4,				Complete proteome,Membrane,Reference proteome,Transmembrane,Transmembrane helix,
36205	CG42336 gene product from transcript CG42336-RB(CG42336)			GO:0016021~integral component of membrane,						Coiled coil,Complete proteome,Membrane,Proteomics identification,Reference proteome,Transmembrane,Transmembrane helix,
32033	CG42339 gene product from transcript CG42339-RB(CG42339)		GO:0006955~immune response,		GO:0005044~scavenger receptor activity,GO:0030247~polysaccharide binding,	IPR000884:Thrombospondin, type 1 repeat,IPR001212:Somatomedin B domain,			SM00209:TSP1,	Complete proteome,Reference proteome,Signal,
37164	CG42351 gene product from transcript CG42351-RI(Jabba)			GO:0005811~lipid particle,GO:0005886~plasma membrane,GO:0016021~integral component of membrane,						Complete proteome,Membrane,Proteomics identification,Reference proteome,Transmembrane,Transmembrane helix,
42600	CG42390 gene product from transcript CG42390-RE(CG42390)	Cell division and chromosome partitioning,								Coiled coil,Complete proteome,Reference proteome,
44653	CG42396 gene product from transcript CG42396-RC(wech)	Function unknown,	GO:0002168~instar larval development,GO:0016203~muscle attachment,GO:0030154~cell differentiation,GO:0033632~regulation of cell-cell adhesion mediated by integrin,	GO:0005622~intracellular,GO:0005927~muscle tendon junction,	GO:0008270~zinc ion binding,GO:0030674~protein binding, bridging,	IPR000315:Zinc finger, B-box,IPR001258:NHL repeat,IPR011042:Six-bladed beta-propeller, TolB-like,IPR013017:NHL repeat, subgroup,			SM00336:BBOX,	Complete proteome,Developmental protein,Differentiation,Metal-binding,Myogenesis,Phosphoprotein,Reference proteome,Repeat,Zinc,Zinc-finger,	chain:Protein wech,modified residue,repeat:NHL 1,repeat:NHL 2,repeat:NHL 3,repeat:NHL 4,repeat:NHL 5,zinc finger region:B box-type 1,zinc finger region:B box-type 2,
8674069	CG42585 gene product from transcript CG42585-RA(CG42585)				GO:0008270~zinc ion binding,	IPR000433:Zinc finger, ZZ-type,IPR008598:Drought induced 19/ RING finger protein 114,			SM00291:ZnF_ZZ,	Complete proteome,Metal-binding,Reference proteome,Zinc,Zinc-finger,
32729	CG43658 gene product from transcript CG43658-RE(CG43658)		GO:0007480~imaginal disc-derived leg morphogenesis,GO:0035023~regulation of Rho protein signal transduction,GO:0035025~positive regulation of Rho protein signal transduction,		GO:0005089~Rho guanyl-nucleotide exchange factor activity,	IPR000219:Dbl homology (DH) domain,IPR001849:Pleckstrin homology domain,IPR011047:Quinonprotein alcohol dehydrogenase-like superfamily,IPR011993:Pleckstrin homology-like domain,			SM00233:PH,SM00325:RhoGEF,	Coiled coil,Complete proteome,Proteomics identification,Reference proteome,
33617	CG43773 gene product from transcript CG43773-RA(CG43773)									Complete proteome,Reference proteome,
36429	CG44251 gene product from transcript CG44251-RA(CG44251)					IPR006616:DM9 repeat,IPR024518:Domain of unknown function DUF3421,			SM00696:DM9,	Complete proteome,Reference proteome,
34001	CG4497 gene product from transcript CG4497-RB(CG4497)					IPR026716:FAM122,				Complete proteome,Proteomics identification,Reference proteome,
32652	CG4678 gene product from transcript CG4678-RD(CG4678)		GO:0006508~proteolysis,GO:0006518~peptide metabolic process,GO:0016485~protein processing,	GO:0005615~extracellular space,GO:0005886~plasma membrane,GO:0009986~cell surface,	GO:0004181~metallocarboxypeptidase activity,GO:0004185~serine-type carboxypeptidase activity,GO:0008270~zinc ion binding,	IPR000834:Peptidase M14, carboxypeptidase A,IPR008969:Carboxypeptidase-like, regulatory domain,IPR014766:Carboxypeptidase, regulatory domain,IPR027062:Carboxypeptidase M,			SM00631:Zn_pept,	Carboxypeptidase,Complete proteome,Hydrolase,Protease,Reference proteome,Signal,
41330	CG4757 gene product from transcript CG4757-RB(CG4757)	Lipid metabolism,	GO:0007158~neuron cell-cell adhesion,GO:0007416~synapse assembly,GO:0050804~modulation of synaptic transmission,	GO:0005887~integral component of plasma membrane,GO:0009986~cell surface,GO:0045202~synapse,	GO:0004872~receptor activity,GO:0016787~hydrolase activity,GO:0042043~neurexin family protein binding,GO:0052689~carboxylic ester hydrolase activity,	IPR002018:Carboxylesterase, type B,IPR019826:Carboxylesterase type B, active site,				Complete proteome,Hydrolase,Reference proteome,Signal,
34410	CG5096 gene product from transcript CG5096-RA(CG5096)			GO:0016021~integral component of membrane,		IPR001611:Leucine-rich repeat,IPR003591:Leucine-rich repeat, typical subtype,IPR026906:Leucine rich repeat 5,			SM00369:LRR_TYP,	Complete proteome,Leucine-rich repeat,Membrane,Reference proteome,Repeat,Signal,Transmembrane,Transmembrane helix,
42431	CG5191 gene product from transcript CG5191-RE(CG5191)	Translation, ribosomal structure and biogenesis,			GO:0004040~amidase activity,GO:0050567~glutaminyl-tRNA synthase (glutamine-hydrolyzing) activity,	IPR000120:Amidase,IPR023631:Amidase signature domain,				Complete proteome,Ligase,Reference proteome,
42655	CG5326 gene product from transcript CG5326-RA(CG5326)		GO:0022008~neurogenesis,GO:0030497~fatty acid elongation,	GO:0016021~integral component of membrane,	GO:0009922~fatty acid elongase activity,GO:0102336~3-oxo-arachidoyl-CoA synthase activity,GO:0102337~3-oxo-cerotoyl-CoA synthase activity,GO:0102338~3-oxo-lignoceronyl-CoA synthase activity,	IPR002076:GNS1/SUR4 membrane protein,				Complete proteome,Fatty acid biosynthesis,Fatty acid metabolism,Lipid biosynthesis,Lipid metabolism,Membrane,Reference proteome,Transferase,Transmembrane,Transmembrane helix,
37139	CG5493 gene product from transcript CG5493-RB(CG5493)		GO:0000097~sulfur amino acid biosynthetic process,GO:0019451~L-cysteine catabolic process to pyruvate, using cysteine dioxygenase,GO:0042412~taurine biosynthetic process,GO:0055114~oxidation-reduction process,	GO:0005829~cytosol,	GO:0005506~iron ion binding,GO:0016702~oxidoreductase activity, acting on single donors with incorporation of molecular oxygen, incorporation of two atoms of oxygen,GO:0017172~cysteine dioxygenase activity,	IPR010300:Cysteine dioxygenase type I,IPR011051:RmlC-like cupin domain,IPR014710:RmlC-like jelly roll fold,	dme00270:Cysteine and methionine metabolism,dme00430:Taurine and hypotaurine metabolism,dme01100:Metabolic pathways,			Complete proteome,Iron,Metal-binding,Oxidoreductase,Reference proteome,Thioether bond,
32441	CG5599 gene product from transcript CG5599-RA(CG5599)	Energy production and conversion,	GO:0006099~tricarboxylic acid cycle,GO:0006909~phagocytosis,GO:0008152~metabolic process,	GO:0009353~mitochondrial oxoglutarate dehydrogenase complex,	GO:0004147~dihydrolipoamide branched chain acyltransferase activity,GO:0016746~transferase activity, transferring acyl groups,	IPR000089:Biotin/lipoyl attachment,IPR001078:2-oxoacid dehydrogenase acyltransferase, catalytic domain,IPR003016:2-oxo acid dehydrogenase, lipoyl-binding site,IPR004167:E3 binding,IPR011053:Single hybrid motif,IPR015761:Lipoamide Acyltransferase,IPR023213:Chloramphenicol acetyltransferase-like domain,	dme00280:Valine, leucine and isoleucine degradation,dme01100:Metabolic pathways,dme01130:Biosynthesis of antibiotics,			Acyltransferase,Complete proteome,Lipoyl,Proteomics identification,Reference proteome,Transferase,
48422	CG5707 gene product from transcript CG5707-RA(CG5707)				GO:0016787~hydrolase activity,	IPR000073:Alpha/beta hydrolase fold-1,				Complete proteome,Reference proteome,
37053	CG5773 gene product from transcript CG5773-RC(CG5773)									Complete proteome,Reference proteome,Signal,
42928	CG5789 gene product from transcript CG5789-RA(CG5789)	Defense mechanisms,Energy production and conversion / Posttranslational modification, protein turnover, chaperones,	GO:0055085~transmembrane transport,	GO:0016021~integral component of membrane,	GO:0005524~ATP binding,GO:0008559~xenobiotic-transporting ATPase activity,GO:0042626~ATPase activity, coupled to transmembrane movement of substances,	IPR003439:ABC transporter-like,IPR003593:AAA+ ATPase domain,IPR011527:ABC transporter, transmembrane domain, type 1,IPR017871:ABC transporter, conserved site,IPR027417:P-loop containing nucleoside triphosphate hydrolase,			SM00382:AAA,	ATP-binding,Complete proteome,Hydrolase,Membrane,Nucleotide-binding,Proteomics identification,Reference proteome,Repeat,Transmembrane,Transmembrane helix,
42505	CG5793 gene product from transcript CG5793-RE(CG5793)	Secondary metabolites biosynthesis, transport, and catabolism,	GO:0008152~metabolic process,		GO:0003824~catalytic activity,	IPR011234:Fumarylacetoacetase, C-terminal-related,				Complete proteome,Proteomics identification,Reference proteome,
47906	CG5935 gene product from transcript CG5935-RE(Dek)		GO:0006338~chromatin remodeling,GO:0006357~regulation of transcription from RNA polymerase II promoter,GO:2000779~regulation of double-strand break repair,	GO:0005654~nucleoplasm,	GO:0003677~DNA binding,GO:0003682~chromatin binding,GO:0042393~histone binding,	IPR003034:SAP domain,IPR009057:Homeodomain-like,IPR014876:DEK, C-terminal,			SM00513:SAP,	Complete proteome,Proteomics identification,Reference proteome,
34022	CG5958 gene product from transcript CG5958-RA(CG5958)		GO:0006810~transport,	GO:0005811~lipid particle,	GO:0005215~transporter activity,	IPR001071:Cellular retinaldehyde binding/alpha-tocopherol transport,IPR001251:CRAL-TRIO domain,IPR011074:CRAL/TRIO, N-terminal domain,			SM00516:SEC14,SM01100:SM01100,	Complete proteome,Proteomics identification,Reference proteome,
39271	CG6175 gene product from transcript CG6175-RC(CG6175)		GO:0002121~inter-male aggressive behavior,GO:0007476~imaginal disc-derived wing morphogenesis,GO:0051726~regulation of cell cycle,			IPR006578:MADF domain,			SM00595:MADF,	Complete proteome,Reference proteome,
43252	CG6271 gene product from transcript CG6271-RA(CG6271)		GO:0016042~lipid catabolic process,	GO:0005576~extracellular region,	GO:0008970~phosphatidylcholine 1-acylhydrolase activity,GO:0016298~lipase activity,GO:0052739~phosphatidylserine 1-acylhydrolase activity,GO:0052740~1-acyl-2-lysophosphatidylserine acylhydrolase activity,	IPR000734:Lipase,IPR002334:Dol/Ves 1 allergen,IPR013818:Lipase, N-terminal,				Complete proteome,Hydrolase,Reference proteome,Secreted,Signal,
36529	CG6329 gene product from transcript CG6329-RE(CG6329)									Complete proteome,Reference proteome,Signal,
32482	CG6340 gene product from transcript CG6340-RE(CG6340)		GO:0019233~sensory perception of pain,	GO:0005654~nucleoplasm,						Complete proteome,Reference proteome,
42901	CG6432 gene product from transcript CG6432-RB(CG6432)		GO:0008152~metabolic process,		GO:0003824~catalytic activity,GO:0003987~acetate-CoA ligase activity,	IPR000873:AMP-dependent synthetase/ligase,IPR025110:Domain of unknown function DUF4009,	dme00640:Propanoate metabolism,dme01100:Metabolic pathways,			Complete proteome,Ligase,Reference proteome,
38691	CG6602 gene product from transcript CG6602-RA(CG6602)									Complete proteome,Reference proteome,Signal,
41324	CG6629 gene product from transcript CG6629-RA(CG6629)		GO:0006099~tricarboxylic acid cycle,GO:0006121~mitochondrial electron transport, succinate to ubiquinone,	GO:0005749~mitochondrial respiratory chain complex II, succinate dehydrogenase complex (ubiquinone),GO:0016021~integral component of membrane,GO:0045281~succinate dehydrogenase complex,	GO:0000104~succinate dehydrogenase activity,	IPR000701:Succinate dehydrogenase/Fumarate reductase, transmembrane subunit,IPR014314:Succinate dehydrogenase, cytochrome b556 subunit,	dme00020:Citrate cycle (TCA cycle),dme00190:Oxidative phosphorylation,dme01100:Metabolic pathways,dme01130:Biosynthesis of antibiotics,dme01200:Carbon metabolism,			Complete proteome,Membrane,Reference proteome,Transmembrane,Transmembrane helix,
42728	CG6726 gene product from transcript CG6726-RC(CG6726)	Amino acid transport and metabolism,	GO:0006520~cellular amino acid metabolic process,GO:0043171~peptide catabolic process,	GO:0005737~cytoplasm,	GO:0004046~aminoacylase activity,GO:0008270~zinc ion binding,GO:0070573~metallodipeptidase activity,	IPR002933:Peptidase M20,IPR010159:N-acyl-L-amino-acid amidohydrolase,IPR011650:Peptidase M20, dimerisation domain,	dme00220:Arginine biosynthesis,dme01100:Metabolic pathways,dme01130:Biosynthesis of antibiotics,dme01210:2-Oxocarboxylic acid metabolism,dme01230:Biosynthesis of amino acids,	PIRSF036696:acyl-amino-acid amidohydrolase 1,		Complete proteome,Cytoplasm,Hydrolase,Metal-binding,Proteomics identification,Reference proteome,Zinc,
39134	CG6761 gene product from transcript CG6761-RA(CG6761)					IPR021777:Protein of unknown function DUF3342,				Complete proteome,Reference proteome,
42643	CG7054 gene product from transcript CG7054-RA(CG7054)					IPR008914:Phosphatidylethanolamine-binding protein PEBP,				3D-structure,Complete proteome,Proteomics identification,Reference proteome,
34472	CG7300 gene product from transcript CG7300-RD(CG7300)									Complete proteome,Proteomics identification,Reference proteome,Signal,
39278	CG7557 gene product from transcript CG7557-RA(CG7557)			GO:0016021~integral component of membrane,		IPR027417:P-loop containing nucleoside triphosphate hydrolase,				Complete proteome,Membrane,Reference proteome,Transmembrane,Transmembrane helix,
34919	CG7631 gene product from transcript CG7631-RA(CG7631)		GO:0006508~proteolysis,GO:0046331~lateral inhibition,		GO:0004222~metalloendopeptidase activity,GO:0008270~zinc ion binding,	IPR001506:Peptidase M12A, astacin,IPR006026:Peptidase, metallopeptidase,IPR024079:Metallopeptidase, catalytic domain,			SM00235:ZnMc,	Complete proteome,Hydrolase,Metal-binding,Metalloprotease,Protease,Reference proteome,Signal,Zinc,
42211	CG7675 gene product from transcript CG7675-RC(CG7675)	Secondary metabolites biosynthesis, transport, and catabolism / General function prediction only,		GO:0005829~cytosol,GO:0016021~integral component of membrane,	GO:0016491~oxidoreductase activity,	IPR002347:Glucose/ribitol dehydrogenase,IPR016040:NAD(P)-binding domain,				Complete proteome,Membrane,Oxidoreductase,Proteomics identification,Reference proteome,Transmembrane,Transmembrane helix,
42257	CG7720 gene product from transcript CG7720-RF(CG7720)		GO:0055085~transmembrane transport,	GO:0005887~integral component of plasma membrane,GO:0016020~membrane,	GO:0005215~transporter activity,GO:0015293~symporter activity,	IPR001734:Sodium/solute symporter,				Complete proteome,Membrane,Reference proteome,Transmembrane,Transmembrane helix,
35521	CG7881 gene product from transcript CG7881-RB(CG7881)		GO:0006820~anion transport,GO:0055085~transmembrane transport,	GO:0005886~plasma membrane,GO:0016021~integral component of membrane,	GO:0022857~transmembrane transporter activity,	IPR011701:Major facilitator superfamily,IPR020846:Major facilitator superfamily domain,				Complete proteome,Membrane,Reference proteome,Transmembrane,Transmembrane helix,
39232	CG7888 gene product from transcript CG7888-RC(CG7888)		GO:0003333~amino acid transmembrane transport,	GO:0016021~integral component of membrane,	GO:0015171~amino acid transmembrane transporter activity,	IPR013057:Amino acid transporter, transmembrane,				Complete proteome,Membrane,Reference proteome,Transmembrane,Transmembrane helix,
32917	CG7992 gene product from transcript CG7992-RA(CG7992)			GO:0016021~integral component of membrane,						Complete proteome,Membrane,Reference proteome,Transmembrane,Transmembrane helix,
35940	CG8024 gene product from transcript CG8024-RD(Rab32)		GO:0006727~ommochrome biosynthetic process,GO:0006856~eye pigment precursor transport,GO:0007611~learning or memory,GO:0008057~eye pigment granule organization,GO:0008355~olfactory learning,GO:0010506~regulation of autophagy,GO:0010883~regulation of lipid storage,GO:0010906~regulation of glucose metabolic process,GO:0016192~vesicle-mediated transport,GO:0032438~melanosome organization,GO:0032482~…	GO:0005764~lysosome,GO:0005776~autophagosome,GO:0005802~trans-Golgi network,GO:0031982~vesicle,GO:0042470~melanosome,GO:0045202~synapse,GO:0055037~recycling endosome,	GO:0003924~GTPase activity,GO:0005515~protein binding,GO:0005525~GTP binding,	IPR001806:Small GTPase superfamily,IPR005225:Small GTP-binding protein domain,IPR027417:P-loop containing nucleoside triphosphate hydrolase,				Complete proteome,Proteomics identification,Reference proteome,
41026	CG8032 gene product from transcript CG8032-RB(CG8032)		GO:0055114~oxidation-reduction process,		GO:0016491~oxidoreductase activity,	IPR002937:Amine oxidase,IPR023753:Pyridine nucleotide-disulphide oxidoreductase, FAD/NAD(P)-binding domain,				Complete proteome,Oxidoreductase,Reference proteome,
36686	CG8093 gene product from transcript CG8093-RB(CG8093)		GO:0006629~lipid metabolic process,GO:0016042~lipid catabolic process,GO:0032504~multicellular organism reproduction,	GO:0005615~extracellular space,	GO:0016298~lipase activity,GO:0016788~hydrolase activity, acting on ester bonds,	IPR006693:Partial AB-hydrolase lipase domain,IPR025483:Lipase, eukaryotic,	dme00561:Glycerolipid metabolism,dme01100:Metabolic pathways,	PIRSF000862:lipase, eukaryotic type,		Complete proteome,Hydrolase,Lipid degradation,Lipid metabolism,Reference proteome,Signal,
39565	CG8100 gene product from transcript CG8100-RC(CG8100)					IPR005203:Hemocyanin, C-terminal,IPR005204:Hemocyanin, N-terminal,IPR008922:Uncharacterised domain, di-copper centre,IPR013788:Hemocyanin/hexamerin,IPR014756:Immunoglobulin E-set,				Complete proteome,Reference proteome,Signal,
39169	CG8104 gene product from transcript CG8104-RE(nudE)		GO:0000132~establishment of mitotic spindle orientation,GO:0007020~microtubule nucleation,GO:0007052~mitotic spindle organization,GO:0007060~male meiosis chromosome segregation,GO:0007080~mitotic metaphase plate congression,GO:0007100~mitotic centrosome separation,GO:0007294~germarium-derived oocyte fate determination,GO:0007298~border follicle cell migration,GO:0007409~axonogenesis,GO:0030951~es…	GO:0000776~kinetochore,GO:0005635~nuclear envelope,GO:0005737~cytoplasm,GO:0005813~centrosome,GO:0005819~spindle,GO:0005871~kinesin complex,GO:0005874~microtubule,GO:0030424~axon,GO:0030425~dendrite,GO:0031616~spindle pole centrosome,GO:0070732~spindle envelope,	GO:0008017~microtubule binding,	IPR006964:NUDE protein, C-terminal,				Cell cycle,Cell division,Coiled coil,Complete proteome,Cytoplasm,Cytoskeleton,Microtubule,Mitosis,Proteomics identification,Reference proteome,	chain:Nuclear distribution protein nudE homolog,
41033	CG8112 gene product from transcript CG8112-RD(CG8112)		GO:0008203~cholesterol metabolic process,GO:0034435~cholesterol esterification,GO:0042632~cholesterol homeostasis,	GO:0005789~endoplasmic reticulum membrane,GO:0016020~membrane,GO:0016021~integral component of membrane,	GO:0008374~O-acyltransferase activity,GO:0034736~cholesterol O-acyltransferase activity,	IPR004299:Membrane bound O-acyl transferase, MBOAT,IPR014371:Sterol O-acyltransferase, ACAT/DAG/ARE types,	dme00100:Steroid biosynthesis,	PIRSF000439:sterol O-acyltransferase, ACAT/DAG/ARE types,PIRSF500230:sterol O-acyltransferase, ACAT type [Parent=PIRSF000439],		Acyltransferase,Complete proteome,Endoplasmic reticulum,Membrane,Reference proteome,Transferase,Transmembrane,Transmembrane helix,
41037	CG8136 gene product from transcript CG8136-RB(CG8136)		GO:0046331~lateral inhibition,							Complete proteome,Reference proteome,
36742	CG8249 gene product from transcript CG8249-RC(CG8249)		GO:0035428~hexose transmembrane transport,GO:0046323~glucose import,GO:0055085~transmembrane transport,	GO:0005887~integral component of plasma membrane,GO:0016021~integral component of membrane,	GO:0005351~sugar:proton symporter activity,GO:0005355~glucose transmembrane transporter activity,GO:0022891~substrate-specific transmembrane transporter activity,	IPR003663:Sugar/inositol transporter,IPR005828:General substrate transporter,IPR005829:Sugar transporter, conserved site,IPR020846:Major facilitator superfamily domain,				Complete proteome,Membrane,Proteomics identification,Reference proteome,Transmembrane,Transmembrane helix,Transport,
32741	CG8289 gene product from transcript CG8289-RB(CG8289)			GO:0005634~nucleus,		IPR000953:Chromo domain/shadow,IPR016197:Chromo domain-like,IPR023780:Chromo domain,			SM00298:CHROMO,	Complete proteome,Nucleus,Proteomics identification,Reference proteome,
39123	CG8329 gene product from transcript CG8329-RA(CG8329)		GO:0006508~proteolysis,GO:0030431~sleep,		GO:0004252~serine-type endopeptidase activity,	IPR001254:Peptidase S1,IPR001314:Peptidase S1A, chymotrypsin-type,IPR009003:Trypsin-like cysteine/serine peptidase domain,IPR018114:Peptidase S1, trypsin family, active site,			SM00020:Tryp_SPc,	Complete proteome,Disulfide bond,Hydrolase,Protease,Reference proteome,Serine protease,Signal,
37275	CG8654 gene product from transcript CG8654-RC(CG8654)		GO:0055085~transmembrane transport,	GO:0016021~integral component of membrane,	GO:0022857~transmembrane transporter activity,GO:0022891~substrate-specific transmembrane transporter activity,	IPR005828:General substrate transporter,IPR020846:Major facilitator superfamily domain,				Complete proteome,Membrane,Reference proteome,Transmembrane,Transmembrane helix,
42050	CG8907 gene product from transcript CG8907-RA(CG8907)		GO:0042048~olfactory behavior,	GO:0045202~synapse,		IPR001452:Src homology-3 domain,IPR011993:Pleckstrin homology-like domain,IPR013625:Tensin phosphotyrosine-binding domain,			SM00326:SH3,	Complete proteome,Reference proteome,SH3 domain,
34799	CG8997 gene product from transcript CG8997-RB(CG8997)					IPR010562:Haemolymph juvenile hormone binding,			SM00700:JHBP,	Complete proteome,Proteomics identification,Reference proteome,Signal,
33825	CG9044 gene product from transcript CG9044-RC(CG9044)	Function unknown,	GO:0008104~protein localization,	GO:0005737~cytoplasm,	GO:0019901~protein kinase binding,	IPR001611:Leucine-rich repeat,				Complete proteome,Proteomics identification,Reference proteome,
32444	CG9081 gene product from transcript CG9081-RA(Cyp4s3)	Secondary metabolites biosynthesis, transport, and catabolism,	GO:0055114~oxidation-reduction process,	GO:0005789~endoplasmic reticulum membrane,GO:0031090~organelle membrane,	GO:0004497~monooxygenase activity,GO:0005506~iron ion binding,GO:0016705~oxidoreductase activity, acting on paired donors, with incorporation or reduction of molecular oxygen,GO:0020037~heme binding,	IPR001128:Cytochrome P450,IPR002401:Cytochrome P450, E-class, group I,IPR017972:Cytochrome P450, conserved site,				Complete proteome,Endoplasmic reticulum,Heme,Iron,Membrane,Metal-binding,Microsome,Monooxygenase,Oxidoreductase,Reference proteome,	binding site:Heme (covalent; via 1 link),chain:Probable cytochrome P450 4s3,metal ion-binding site:Iron (heme axial ligand),
33856	CG9150 gene product from transcript CG9150-RB(CG9150)				GO:0016491~oxidoreductase activity,	IPR002347:Glucose/ribitol dehydrogenase,IPR016040:NAD(P)-binding domain,IPR020904:Short-chain dehydrogenase/reductase, conserved site,				Complete proteome,Oxidoreductase,Reference proteome,
35555	CG9397 gene product from transcript CG9397-RI(jing)		GO:0000122~negative regulation of transcription from RNA polymerase II promoter,GO:0006351~transcription, DNA-templated,GO:0007298~border follicle cell migration,GO:0007382~specification of segmental identity, maxillary segment,GO:0007411~axon guidance,GO:0007417~central nervous system development,GO:0007418~ventral midline development,GO:0007424~open tracheal system development,GO:0007474~imagin…	GO:0005634~nucleus,GO:0035098~ESC/E(Z) complex,	GO:0003676~nucleic acid binding,GO:0046872~metal ion binding,	IPR007087:Zinc finger, C2H2,IPR013087:Zinc finger C2H2-type/integrase DNA-binding domain,IPR015880:Zinc finger, C2H2-like,			SM00355:ZnF_C2H2,	Chromatin regulator,Coiled coil,Complete proteome,Developmental protein,Metal-binding,Nucleus,Reference proteome,Repeat,Repressor,Transcription,Transcription regulation,Zinc,Zinc-finger,	chain:Zinc finger protein jing,compositionally biased region:Ala-rich,compositionally biased region:Asn-rich,compositionally biased region:Gln-rich,compositionally biased region:Poly-Gln,compositionally biased region:Poly-Ser,compositionally biased region:Ser-rich,sequence conflict,zinc finger region:C2H2-type 1,zinc finger region:C2H2-type 2; degenerate,zinc finger region:C2H2-type 3,
37435	CG9485 gene product from transcript CG9485-RF(CG9485)		GO:0005978~glycogen biosynthetic process,GO:0005980~glycogen catabolic process,	GO:0005737~cytoplasm,	GO:0004134~4-alpha-glucanotransferase activity,GO:0004135~amylo-alpha-1,6-glucosidase activity,GO:0030247~polysaccharide binding,	IPR006421:Glycogen debranching enzyme, metazoa,IPR008928:Six-hairpin glycosidase-like,IPR010401:Amylo-alpha-1,6-glucosidase,IPR013781:Glycoside hydrolase, catalytic domain,IPR017853:Glycoside hydrolase, superfamily,	dme00500:Starch and sucrose metabolism,dme01100:Metabolic pathways,			Complete proteome,Glycosidase,Glycosyltransferase,Hydrolase,Proteomics identification,Reference proteome,Transferase,
33898	CG9527 gene product from transcript CG9527-RD(CG9527)		GO:0006635~fatty acid beta-oxidation,GO:0006909~phagocytosis,GO:0033539~fatty acid beta-oxidation using acyl-CoA dehydrogenase,GO:0055088~lipid homeostasis,	GO:0005777~peroxisome,	GO:0000062~fatty-acyl-CoA binding,GO:0003995~acyl-CoA dehydrogenase activity,GO:0003997~acyl-CoA oxidase activity,GO:0009055~electron carrier activity,GO:0016402~pristanoyl-CoA oxidase activity,GO:0050660~flavin adenine dinucleotide binding,GO:0052890~oxidoreductase activity, acting on the CH-CH group of donors, with a flavin as acceptor,	IPR002655:Acyl-CoA oxidase, C-terminal,IPR006091:Acyl-CoA oxidase/dehydrogenase, central domain,IPR009075:Acyl-CoA dehydrogenase/oxidase C-terminal,IPR009100:Acyl-CoA dehydrogenase/oxidase,IPR012258:Acyl-CoA oxidase,	dme00071:Fatty acid degradation,dme00592:alpha-Linolenic acid metabolism,dme01040:Biosynthesis of unsaturated fatty acids,dme01100:Metabolic pathways,dme01212:Fatty acid metabolism,dme04146:Peroxisome,	PIRSF000168:acyl-CoA oxidase,		Complete proteome,FAD,Flavoprotein,Oxidoreductase,Proteomics identification,Reference proteome,
33911	CG9547 gene product from transcript CG9547-RA(CG9547)	Lipid metabolism,	GO:0006554~lysine catabolic process,GO:0006568~tryptophan metabolic process,GO:0033539~fatty acid beta-oxidation using acyl-CoA dehydrogenase,GO:0046948~hydroxylysine catabolic process,GO:0055088~lipid homeostasis,GO:0055114~oxidation-reduction process,	GO:0005739~mitochondrion,GO:0005759~mitochondrial matrix,GO:0005875~microtubule associated complex,	GO:0000062~fatty-acyl-CoA binding,GO:0003995~acyl-CoA dehydrogenase activity,GO:0004361~glutaryl-CoA dehydrogenase activity,GO:0009055~electron carrier activity,GO:0050660~flavin adenine dinucleotide binding,GO:0052890~oxidoreductase activity, acting on the CH-CH group of donors, with a flavin as acceptor,	IPR006091:Acyl-CoA oxidase/dehydrogenase, central domain,IPR009075:Acyl-CoA dehydrogenase/oxidase C-terminal,IPR009100:Acyl-CoA dehydrogenase/oxidase,IPR013786:Acyl-CoA dehydrogenase/oxidase, N-terminal,	dme00071:Fatty acid degradation,dme00310:Lysine degradation,dme00380:Tryptophan metabolism,dme01100:Metabolic pathways,dme01130:Biosynthesis of antibiotics,			Complete proteome,FAD,Flavoprotein,Oxidoreductase,Proteomics identification,Reference proteome,
34227	CG9568 gene product from transcript CG9568-RA(CG9568)									Complete proteome,Reference proteome,Signal,
43593	CG9743 gene product from transcript CG9743-RA(CG9743)		GO:0006629~lipid metabolic process,GO:0006636~unsaturated fatty acid biosynthetic process,GO:0042759~long-chain fatty acid biosynthetic process,GO:0055114~oxidation-reduction process,	GO:0005789~endoplasmic reticulum membrane,GO:0016021~integral component of membrane,	GO:0004768~stearoyl-CoA 9-desaturase activity,GO:0005506~iron ion binding,GO:0016717~oxidoreductase activity, acting on paired donors, with oxidation of a pair of donors resulting in the reduction of molecular oxygen to two molecules of water,	IPR005804:Fatty acid desaturase, type 1,IPR015876:Fatty acid desaturase, type 1, core,	dme01040:Biosynthesis of unsaturated fatty acids,dme01212:Fatty acid metabolism,			Complete proteome,Fatty acid biosynthesis,Fatty acid metabolism,Lipid biosynthesis,Lipid metabolism,Membrane,Oxidoreductase,Reference proteome,Transmembrane,Transmembrane helix,
37625	CG9826 gene product from transcript CG9826-RC(CG9826)		GO:0055085~transmembrane transport,	GO:0016021~integral component of membrane,		IPR011701:Major facilitator superfamily,IPR020846:Major facilitator superfamily domain,				Complete proteome,Membrane,Reference proteome,Transmembrane,Transmembrane helix,
33438	CG9964 gene product from transcript CG9964-RC(Cyp309a1)	Secondary metabolites biosynthesis, transport, and catabolism,	GO:0046331~lateral inhibition,GO:0055114~oxidation-reduction process,	GO:0005789~endoplasmic reticulum membrane,GO:0031090~organelle membrane,	GO:0004497~monooxygenase activity,GO:0005506~iron ion binding,GO:0016491~oxidoreductase activity,GO:0016705~oxidoreductase activity, acting on paired donors, with incorporation or reduction of molecular oxygen,GO:0020037~heme binding,	IPR001128:Cytochrome P450,IPR002401:Cytochrome P450, E-class, group I,IPR017972:Cytochrome P450, conserved site,				Complete proteome,Endoplasmic reticulum,Heme,Iron,Membrane,Metal-binding,Microsome,Monooxygenase,Oxidoreductase,Phosphoprotein,Reference proteome,	chain:Probable cytochrome P450 309a1,metal ion-binding site:Iron (heme axial ligand),modified residue,sequence conflict,
8674098	Calcineurin A at 14F(CanA-14F)		GO:0006470~protein dephosphorylation,GO:0030431~sleep,GO:0051533~positive regulation of NFAT protein import into nucleus,		GO:0004721~phosphoprotein phosphatase activity,GO:0004722~protein serine/threonine phosphatase activity,GO:0016787~hydrolase activity,GO:0033192~calmodulin-dependent protein phosphatase activity,GO:0046872~metal ion binding,	IPR004843:Metallophosphoesterase domain,IPR006186:Serine/threonine-specific protein phosphatase/bis(5-nucleosyl)-tetraphosphatase,	dme04310:Wnt signaling pathway,		SM00156:PP2Ac,	Calcium,Calmodulin-binding,Complete proteome,Hydrolase,Iron,Metal-binding,Phosphoprotein,Protein phosphatase,Reference proteome,Zinc,
37232	Calpain-A(CalpA)		GO:0006508~proteolysis,GO:0006909~phagocytosis,GO:0007520~myoblast fusion,GO:0008340~determination of adult lifespan,GO:0008345~larval locomotory behavior,GO:0009953~dorsal/ventral pattern formation,GO:0016322~neuron remodeling,GO:0016540~protein autoprocessing,GO:0021919~BMP signaling pathway involved in spinal cord dorsal/ventral patterning,GO:0042335~cuticle development,GO:0050832~defense resp…	GO:0005622~intracellular,GO:0005737~cytoplasm,GO:0015629~actin cytoskeleton,GO:0043025~neuronal cell body,	GO:0004198~calcium-dependent cysteine-type endopeptidase activity,GO:0005509~calcium ion binding,	IPR000169:Cysteine peptidase, cysteine active site,IPR001300:Peptidase C2, calpain, catalytic domain,IPR002048:EF-hand domain,IPR011992:EF-hand-like domain,IPR018247:EF-Hand 1, calcium-binding site,IPR022682:Peptidase C2, calpain, large subunit, domain III,IPR022683:Peptidase C2, calpain, domain III,IPR022684:Peptidase C2, calpain family,			SM00054:EFh,SM00230:CysPc,SM00720:calpain_III,	Alternative splicing,Autocatalytic cleavage,Calcium,Complete proteome,Cytoplasm,Direct protein sequencing,Hydrolase,Metal-binding,Protease,Proteomics identification,Reference proteome,Repeat,Thiol protease,	calcium-binding region:1,calcium-binding region:2,chain:Calpain-A,chain:Calpain-A catalytic subunit,domain:Calpain catalytic,domain:EF-hand 1,domain:EF-hand 2,domain:EF-hand 3,domain:EF-hand 4,domain:EF-hand 5,region of interest:Domain III,region of interest:Domain IV,region of interest:Linker,sequence conflict,site:Cleavage; by autolysis,splice variant,
41070	Carbonic anhydrase beta(CAHbeta)		GO:0006730~one-carbon metabolic process,GO:0019233~sensory perception of pain,	GO:0005739~mitochondrion,	GO:0004089~carbonate dehydratase activity,GO:0008270~zinc ion binding,	IPR001765:Carbonic anhydrase,	dme00910:Nitrogen metabolism,		SM00947:SM00947,	Complete proteome,Lyase,Reference proteome,Zinc,
38961	Cbl proto-oncogene ortholog(Cbl)		GO:0001754~eye photoreceptor cell differentiation,GO:0006109~regulation of carbohydrate metabolic process,GO:0006508~proteolysis,GO:0006897~endocytosis,GO:0007173~epidermal growth factor receptor signaling pathway,GO:0007175~negative regulation of epidermal growth factor-activated receptor activity,GO:0007298~border follicle cell migration,GO:0007465~R7 cell fate commitment,GO:0007476~imaginal di…	GO:0005634~nucleus,GO:0005737~cytoplasm,GO:0005886~plasma membrane,GO:0005938~cell cortex,GO:0045121~membrane raft,	GO:0001784~phosphotyrosine binding,GO:0004842~ubiquitin-protein transferase activity,GO:0004871~signal transducer activity,GO:0005509~calcium ion binding,GO:0005515~protein binding,GO:0008270~zinc ion binding,GO:0016874~ligase activity,GO:0017124~SH3 domain binding,GO:0030971~receptor tyrosine kinase binding,GO:0061630~ubiquitin protein ligase activity,	IPR000980:SH2 domain,IPR001841:Zinc finger, RING-type,IPR003153:Adaptor protein Cbl, N-terminal helical,IPR009060:UBA-like,IPR011992:EF-hand-like domain,IPR013083:Zinc finger, RING/FYVE/PHD-type,IPR014741:Adaptor protein Cbl, EF hand-like,IPR014742:Adaptor protein Cbl, SH2-like,IPR015940:Ubiquitin-associated/translation elongation factor EF1B, N-terminal, eukaryote,IPR017907:Zinc finger, RING-typ…	dme04120:Ubiquitin mediated proteolysis,dme04144:Endocytosis,		SM00165:UBA,SM00184:RING,	Complete proteome,Ligase,Reference proteome,
43599	Cecropin C(CecC)		GO:0006959~humoral immune response,GO:0019731~antibacterial humoral response,GO:0042742~defense response to bacterium,GO:0045087~innate immune response,GO:0050829~defense response to Gram-negative bacterium,GO:0050830~defense response to Gram-positive bacterium,	GO:0005576~extracellular region,GO:0005615~extracellular space,		IPR000875:Cecropin,IPR020400:Cecropin, diptera,				Amidation,Antibiotic,Antimicrobial,Complete proteome,Immunity,Innate immunity,Polymorphism,Reference proteome,Secreted,Signal,	chain:Cecropin-C,modified residue,sequence variant,signal peptide,
40640	Ceramide kinase(Cerk)		GO:0006672~ceramide metabolic process,GO:0007280~pole cell migration,GO:0007476~imaginal disc-derived wing morphogenesis,GO:0007602~phototransduction,GO:0035071~salivary gland cell autophagic cell death,GO:0048102~autophagic cell death,	GO:0005886~plasma membrane,	GO:0001729~ceramide kinase activity,	IPR001206:Diacylglycerol kinase, catalytic domain,IPR016064:ATP-NAD kinase-like domain,	dme00600:Sphingolipid metabolism,		SM00046:DAGKc,	Complete proteome,Kinase,Reference proteome,Transferase,
40011	Chemosensory protein A 75a(CheA75a)		GO:0007606~sensory perception of chemical stimulus,	GO:0005576~extracellular region,		IPR010512:Protein of unknown function DUF1091,			SM00697:DM8,	Complete proteome,Reference proteome,Signal,
34896	Cullin 3(Cul3)		GO:0001745~compound eye morphogenesis,GO:0006511~ubiquitin-dependent protein catabolic process,GO:0006919~activation of cysteine-type endopeptidase activity involved in apoptotic process,GO:0007283~spermatogenesis,GO:0007291~sperm individualization,GO:0007409~axonogenesis,GO:0007423~sensory organ development,GO:0007476~imaginal disc-derived wing morphogenesis,GO:0016567~protein ubiquitination,GO:…	GO:0005737~cytoplasm,GO:0031463~Cul3-RING ubiquitin ligase complex,GO:0035324~female germline ring canal,	GO:0004842~ubiquitin-protein transferase activity,GO:0031625~ubiquitin protein ligase binding,	IPR001373:Cullin, N-terminal,IPR011991:Winged helix-turn-helix DNA-binding domain,IPR016157:Cullin, conserved site,IPR016158:Cullin homology,IPR016159:Cullin repeat-like-containing domain,IPR019559:Cullin protein, neddylation domain,	dme04120:Ubiquitin mediated proteolysis,		SM00182:CULLIN,SM00884:SM00884,	Complete proteome,Proteomics identification,Reference proteome,
38990	Cuticular protein 66D(Cpr66D)		GO:0040003~chitin-based cuticle development,	GO:0031012~extracellular matrix,	GO:0008010~structural constituent of chitin-based larval cuticle,GO:0042302~structural constituent of cuticle,	IPR000618:Insect cuticle protein,				Complete proteome,Proteomics identification,Reference proteome,Signal,
36806	Cyclic nucleotide-gated ion channel subunit A(CngA)		GO:0001666~response to hypoxia,GO:0006812~cation transport,GO:0019934~cGMP-mediated signaling,GO:0042391~regulation of membrane potential,GO:0055085~transmembrane transport,	GO:0005622~intracellular,GO:0005887~integral component of plasma membrane,GO:0016021~integral component of membrane,GO:0017071~intracellular cyclic nucleotide activated cation channel complex,	GO:0005216~ion channel activity,GO:0005221~intracellular cyclic nucleotide activated cation channel activity,GO:0005222~intracellular cAMP activated cation channel activity,GO:0005223~intracellular cGMP activated cation channel activity,GO:0005249~voltage-gated potassium channel activity,GO:0030553~cGMP binding,	IPR000595:Cyclic nucleotide-binding domain,IPR005821:Ion transport domain,IPR014710:RmlC-like jelly roll fold,IPR018488:Cyclic nucleotide-binding, conserved site,IPR018490:Cyclic nucleotide-binding-like,			SM00100:cNMP,	cGMP,cGMP-binding,Coiled coil,Complete proteome,Glycoprotein,Ion channel,Ion transport,Ligand-gated ion channel,Membrane,Nucleotide-binding,Reference proteome,Transmembrane,Transmembrane helix,Transport,	binding site:cGMP,chain:Cyclic nucleotide-gated cation channel,glycosylation site:N-linked (GlcNAc...),nucleotide phosphate-binding region:cGMP,sequence conflict,topological domain:Cytoplasmic,topological domain:Extracellular,transmembrane region,
37479	Cyclic nucleotide-gated ion channel subunit B(CngB)		GO:0006812~cation transport,GO:0019935~cyclic-nucleotide-mediated signaling,GO:0042391~regulation of membrane potential,GO:0055085~transmembrane transport,	GO:0005622~intracellular,GO:0005887~integral component of plasma membrane,GO:0017071~intracellular cyclic nucleotide activated cation channel complex,	GO:0005221~intracellular cyclic nucleotide activated cation channel activity,GO:0005222~intracellular cAMP activated cation channel activity,GO:0005223~intracellular cGMP activated cation channel activity,GO:0005249~voltage-gated potassium channel activity,GO:0030553~cGMP binding,	IPR000595:Cyclic nucleotide-binding domain,IPR005821:Ion transport domain,IPR014710:RmlC-like jelly roll fold,IPR018488:Cyclic nucleotide-binding, conserved site,IPR018490:Cyclic nucleotide-binding-like,			SM00100:cNMP,	Complete proteome,Ion transport,Membrane,Reference proteome,Transmembrane,Transmembrane helix,Transport,
36727	Cyclin-dependent kinase 5(Cdk5)		GO:0000278~mitotic cell cycle,GO:0006468~protein phosphorylation,GO:0007409~axonogenesis,GO:0007629~flight behavior,GO:0008045~motor neuron axon guidance,GO:0008340~determination of adult lifespan,GO:0008344~adult locomotory behavior,GO:0008582~regulation of synaptic growth at neuromuscular junction,GO:0010906~regulation of glucose metabolic process,GO:0019233~sensory perception of pain,GO:003501…	GO:0005622~intracellular,GO:0016533~cyclin-dependent protein kinase 5 holoenzyme complex,	GO:0004674~protein serine/threonine kinase activity,GO:0004693~cyclin-dependent protein serine/threonine kinase activity,GO:0005524~ATP binding,	IPR000719:Protein kinase, catalytic domain,IPR008271:Serine/threonine-protein kinase, active site,IPR011009:Protein kinase-like domain,IPR017441:Protein kinase, ATP binding site,			SM00220:S_TKc,	ATP-binding,Cell cycle,Cell division,Complete proteome,Kinase,Nucleotide-binding,Phosphoprotein,Reference proteome,Serine/threonine-protein kinase,Transferase,	active site:Proton acceptor,binding site:ATP,chain:Cell division protein kinase 5 homolog,domain:Protein kinase,modified residue,nucleotide phosphate-binding region:ATP,sequence conflict,
34291	Cytochrome P450-4e3(Cyp4e3)	Secondary metabolites biosynthesis, transport, and catabolism,	GO:0055114~oxidation-reduction process,	GO:0005783~endoplasmic reticulum,GO:0005789~endoplasmic reticulum membrane,GO:0005811~lipid particle,GO:0031090~organelle membrane,	GO:0004497~monooxygenase activity,GO:0005506~iron ion binding,GO:0016705~oxidoreductase activity, acting on paired donors, with incorporation or reduction of molecular oxygen,GO:0020037~heme binding,	IPR001128:Cytochrome P450,IPR002401:Cytochrome P450, E-class, group I,IPR017972:Cytochrome P450, conserved site,				Complete proteome,Endoplasmic reticulum,Heme,Iron,Membrane,Metal-binding,Microsome,Monooxygenase,Oxidoreductase,Reference proteome,Signal,	binding site:Heme (covalent; via 1 link),chain:Cytochrome P450 4e3,metal ion-binding site:Iron (heme axial ligand),
50246	Cytochrome c oxidase subunit 7C(COX7C)		GO:0006123~mitochondrial electron transport, cytochrome c to oxygen,GO:0007406~negative regulation of neuroblast proliferation,	GO:0005751~mitochondrial respiratory chain complex IV,GO:0016021~integral component of membrane,	GO:0004129~cytochrome-c oxidase activity,	IPR004202:Cytochrome c oxidase subunit VIIc,	dme00190:Oxidative phosphorylation,dme01100:Metabolic pathways,			Complete proteome,Membrane,Oxidoreductase,Reference proteome,Transmembrane,Transmembrane helix,
43457	Cytochrome c1-like(Cyt-c1L)	Energy production and conversion,	GO:0006122~mitochondrial electron transport, ubiquinol to cytochrome c,	GO:0005750~mitochondrial respiratory chain complex III,	GO:0009055~electron carrier activity,GO:0020037~heme binding,GO:0045153~electron transporter, transferring electrons within CoQH2-cytochrome c reductase complex activity,	IPR002326:Cytochrome c1,IPR009056:Cytochrome c domain,IPR021157:Cytochrome c1, transmembrane anchor, C-terminal,	dme00190:Oxidative phosphorylation,dme01100:Metabolic pathways,			Coiled coil,Complete proteome,Proteomics identification,Reference proteome,
35687	Death resistor Adh domain containing target(Drat)		GO:0001666~response to hypoxia,GO:0030431~sleep,GO:0055114~oxidation-reduction process,GO:0071361~cellular response to ethanol,		GO:0008270~zinc ion binding,GO:0016491~oxidoreductase activity,	IPR002085:Alcohol dehydrogenase superfamily, zinc-type,IPR011032:GroES-like,IPR016040:NAD(P)-binding domain,IPR020843:Polyketide synthase, enoylreductase,			SM00829:SM00829,	Complete proteome,Oxidoreductase,Proteomics identification,Reference proteome,
42313	Delta(Dl)		GO:0001708~cell fate specification,GO:0001736~establishment of planar polarity,GO:0007015~actin filament organization,GO:0007155~cell adhesion,GO:0007219~Notch signaling pathway,GO:0007275~multicellular organism development,GO:0007298~border follicle cell migration,GO:0007314~oocyte anterior/posterior axis specification,GO:0007398~ectoderm development,GO:0007399~nervous system development,GO:0007…	GO:0005768~endosome,GO:0005886~plasma membrane,GO:0005912~adherens junction,GO:0009986~cell surface,GO:0016021~integral component of membrane,GO:0030139~endocytic vesicle,GO:0031410~cytoplasmic vesicle,GO:0035003~subapical complex,	GO:0005102~receptor binding,GO:0005112~Notch binding,GO:0005509~calcium ion binding,	IPR000152:EGF-type aspartate/asparagine hydroxylation site,IPR000742:Epidermal growth factor-like domain,IPR001774:Delta/Serrate/lag-2 (DSL) protein,IPR001881:EGF-like calcium-binding,IPR009030:Insulin-like growth factor binding protein, N-terminal,IPR011651:Notch ligand, N-terminal,IPR013032:EGF-like, conserved site,IPR018097:EGF-like calcium-binding, conserved site,	dme04330:Notch signaling pathway,		SM00051:DSL,SM00179:EGF_CA,SM00181:EGF,	3D-structure,Complete proteome,Developmental protein,Differentiation,Disulfide bond,EGF-like domain,Glycoprotein,Membrane,Neurogenesis,Notch signaling pathway,Phosphoprotein,Reference proteome,Repeat,Signal,Transmembrane,Transmembrane helix,Ubl conjugation,	chain:Neurogenic locus protein delta,disulfide bond,domain:DSL,domain:EGF-like 1,domain:EGF-like 2,domain:EGF-like 3,domain:EGF-like 4,domain:EGF-like 5,domain:EGF-like 6,domain:EGF-like 7; calcium-binding,domain:EGF-like 8,domain:EGF-like 9; calcium-binding,glycosylation site:N-linked (GlcNAc...),modified residue,sequence conflict,sequence variant,signal peptide,topological domain:Cytoplasmic,to…
40792	Dementin(Dmtn)		GO:0007420~brain development,	GO:0012505~endomembrane system,GO:0016021~integral component of membrane,		IPR019394:Predicted transmembrane/coiled-coil 2 protein,				Coiled coil,Complete proteome,Membrane,Reference proteome,Transmembrane,Transmembrane helix,
41726	Dopamine 1-like receptor 1(Dop1R1)		GO:0001963~synaptic transmission, dopaminergic,GO:0007191~adenylate cyclase-activating dopamine receptor signaling pathway,GO:0007212~dopamine receptor signaling pathway,GO:0007612~learning,GO:0007613~memory,GO:0008306~associative learning,GO:0008355~olfactory learning,GO:0008542~visual learning,GO:0009744~response to sucrose,GO:0040040~thermosensory behavior,GO:0042594~response to starvation,GO:…	GO:0005887~integral component of plasma membrane,GO:0016021~integral component of membrane,GO:0098793~presynapse,	GO:0001588~dopamine neurotransmitter receptor activity, coupled via Gs,GO:0004930~G-protein coupled receptor activity,GO:0004952~dopamine neurotransmitter receptor activity,GO:0035240~dopamine binding,	IPR000276:G protein-coupled receptor, rhodopsin-like,IPR000929:Dopamine receptor family,IPR017452:GPCR, rhodopsin-like, 7TM,	dme04080:Neuroactive ligand-receptor interaction,		SM01381:SM01381,	Alternative splicing,Cell membrane,Complete proteome,Disulfide bond,G-protein coupled receptor,Glycoprotein,Lipoprotein,Membrane,Palmitate,Phosphoprotein,Polymorphism,Receptor,Reference proteome,Signal,Transducer,Transmembrane,Transmembrane helix,	chain:Dopamine receptor 1,disulfide bond,glycosylation site:N-linked (GlcNAc...),lipid moiety-binding region:S-palmitoyl cysteine,sequence conflict,sequence variant,signal peptide,splice variant,topological domain:Cytoplasmic,topological domain:Extracellular,transmembrane region,
117294	Dorsal switch protein 1(Dsp1)		GO:0000122~negative regulation of transcription from RNA polymerase II promoter,GO:0006268~DNA unwinding involved in DNA replication,GO:0006338~chromatin remodeling,GO:0007379~segment specification,GO:0008348~negative regulation of antimicrobial humoral response,GO:0017055~negative regulation of RNA polymerase II transcriptional preinitiation complex assembly,GO:0032502~developmental process,GO:0…	GO:0005634~nucleus,GO:0005700~polytene chromosome,	GO:0003677~DNA binding,GO:0003697~single-stranded DNA binding,GO:0008134~transcription factor binding,GO:0008301~DNA binding, bending,GO:0017025~TBP-class protein binding,	IPR009071:High mobility group (HMG) box domain,IPR017967:HMG box A DNA-binding domain, conserved site,	dme03410:Base excision repair,		SM00398:HMG,	Alternative splicing,Chromosome,Coiled coil,Complete proteome,DNA-binding,Nucleus,Proteomics identification,Reference proteome,Repeat,	chain:High mobility group protein DSP1,compositionally biased region:Asp/Glu-rich (acidic),compositionally biased region:Gln-rich,compositionally biased region:Poly-Ala,DNA-binding region:HMG box 1,DNA-binding region:HMG box 2,sequence conflict,splice variant,
39617	Doublecortin-domain-containing echinoderm-microtubule-associated protein ortholog(DCX-EMAP)		GO:0007605~sensory perception of sound,GO:0008344~adult locomotory behavior,GO:0035011~melanotic encapsulation of foreign target,GO:0035556~intracellular signal transduction,	GO:0005622~intracellular,GO:0005737~cytoplasm,GO:0005874~microtubule,GO:0071683~sensory dendrite,	GO:0008017~microtubule binding,	IPR001680:WD40 repeat,IPR003533:Doublecortin domain,IPR005108:HELP,IPR011047:Quinonprotein alcohol dehydrogenase-like superfamily,IPR015943:WD40/YVTN repeat-like-containing domain,IPR017986:WD40-repeat-containing domain,IPR019775:WD40 repeat, conserved site,			SM00320:WD40,SM00537:DCX,	Alternative splicing,Complete proteome,Cytoplasm,Cytoskeleton,Microtubule,Reference proteome,Repeat,WD repeat,	chain:Echinoderm microtubule-associated protein-like CG42247,domain:Doublecortin 1,domain:Doublecortin 2,repeat:WD 1,repeat:WD 10,repeat:WD 11,repeat:WD 2,repeat:WD 3,repeat:WD 4,repeat:WD 5,repeat:WD 6,repeat:WD 7,repeat:WD 8,repeat:WD 9,sequence conflict,splice variant,
36362	Dystrobrevin(Dyb)			GO:0005737~cytoplasm,GO:0016010~dystrophin-associated glycoprotein complex,GO:0016014~dystrobrevin complex,	GO:0008092~cytoskeletal protein binding,GO:0008270~zinc ion binding,GO:0008307~structural constituent of muscle,	IPR000433:Zinc finger, ZZ-type,IPR011992:EF-hand-like domain,IPR015153:EF-hand domain, type 1,IPR015154:EF-hand domain, type 2,IPR017432:Distrobrevin,		PIRSF038204:distrobrevin,	SM00291:ZnF_ZZ,	Coiled coil,Complete proteome,Cytoplasm,Metal-binding,Reference proteome,Zinc,Zinc-finger,
36773	Dystroglycan(Dg)		GO:0006110~regulation of glycolytic process,GO:0007016~cytoskeletal anchoring at plasma membrane,GO:0007163~establishment or maintenance of cell polarity,GO:0007293~germarium-derived egg chamber formation,GO:0007295~growth of a germarium-derived egg chamber,GO:0007309~oocyte axis specification,GO:0007314~oocyte anterior/posterior axis specification,GO:0007411~axon guidance,GO:0007474~imaginal dis…	GO:0005886~plasma membrane,GO:0009925~basal plasma membrane,GO:0016010~dystrophin-associated glycoprotein complex,GO:0016011~dystroglycan complex,GO:0016021~integral component of membrane,GO:0030018~Z disc,GO:0030315~T-tubule,GO:0031594~neuromuscular junction,GO:0042383~sarcolemma,	GO:0005509~calcium ion binding,GO:0005515~protein binding,GO:0008307~structural constituent of muscle,	IPR006644:Dystroglycan-type cadherin-like,IPR008465:Dystroglycan,IPR013783:Immunoglobulin-like fold,IPR015919:Cadherin-like,IPR027468:Alpha-dystroglycan domain 2,	dme04512:ECM-receptor interaction,		SM00736:CADG,	Complete proteome,Membrane,Proteomics identification,Reference proteome,Signal,Transmembrane,Transmembrane helix,
33670	Early boundary activity 3(Elba3)		GO:0031937~positive regulation of chromatin silencing,	GO:0005634~nucleus,GO:0005677~chromatin silencing complex,	GO:0030674~protein binding, bridging,					Complete proteome,Nucleus,Reference proteome,
38513	Ecdysone-inducible gene L2(ImpL2)		GO:0007155~cell adhesion,GO:0008340~determination of adult lifespan,GO:0010888~negative regulation of lipid storage,GO:0046627~negative regulation of insulin receptor signaling pathway,GO:0046628~positive regulation of insulin receptor signaling pathway,	GO:0005615~extracellular space,	GO:0005520~insulin-like growth factor binding,	IPR003598:Immunoglobulin subtype 2,IPR003599:Immunoglobulin subtype,IPR007110:Immunoglobulin-like domain,IPR013098:Immunoglobulin I-set,IPR013783:Immunoglobulin-like fold,			SM00408:IGc2,SM00409:IG,	3D-structure,Alternative splicing,Cell adhesion,Complete proteome,Developmental protein,Disulfide bond,Immunoglobulin domain,Proteomics identification,Reference proteome,Repeat,Secreted,Signal,	chain:Neural/ectodermal development factor IMP- L2,disulfide bond,domain:Ig-like C2-type 1,domain:Ig-like C2-type 2,sequence conflict,signal peptide,splice variant,
42265	Endophilin A(EndoA)		GO:0006897~endocytosis,GO:0007269~neurotransmitter secretion,GO:0048488~synaptic vesicle endocytosis,GO:0050803~regulation of synapse structure or activity,GO:0097320~membrane tubulation,	GO:0005737~cytoplasm,GO:0005829~cytosol,GO:0016020~membrane,GO:0098793~presynapse,	GO:0005543~phospholipid binding,GO:0042171~lysophosphatidic acid acyltransferase activity,	IPR001452:Src homology-3 domain,IPR004148:BAR domain,IPR013315:Spectrin alpha chain, SH3 domain,IPR027267:Arfaptin homology (AH) domain/BAR domain,	dme04144:Endocytosis,		SM00326:SH3,SM00721:BAR,	Coiled coil,Complete proteome,Cytoplasm,Endocytosis,Membrane,Phosphoprotein,Proteomics identification,Reference proteome,RNA editing,SH3 domain,	chain:Endophilin-A,domain:BAR,domain:SH3,modified residue,sequence variant,
3355111	Fatty acid synthase 3(FASN3)		GO:0009058~biosynthetic process,GO:0055114~oxidation-reduction process,		GO:0004312~fatty acid synthase activity,GO:0016491~oxidoreductase activity,GO:0016740~transferase activity,GO:0016788~hydrolase activity, acting on ester bonds,GO:0031177~phosphopantetheine binding,	IPR001031:Thioesterase,IPR001227:Acyl transferase domain,IPR009081:Acyl carrier protein-like,IPR011032:GroES-like,IPR013149:Alcohol dehydrogenase, C-terminal,IPR013968:Polyketide synthase, KR,IPR014030:Beta-ketoacyl synthase, N-terminal,IPR014031:Beta-ketoacyl synthase, C-terminal,IPR014043:Acyl transferase,IPR016035:Acyl transferase/acyl hydrolase/lysophospholipase,IPR016036:Malonyl-CoA ACP tran…	dme00061:Fatty acid biosynthesis,dme01100:Metabolic pathways,dme01212:Fatty acid metabolism,		SM00823:SM00823,SM00825:SM00825,SM00827:SM00827,SM00829:SM00829,	Acyltransferase,Complete proteome,Hydrolase,Oxidoreductase,Proteomics identification,Reference proteome,Transferase,
40148	G protein beta-subunit 76C(Gbeta76C)		GO:0007186~G-protein coupled receptor signaling pathway,GO:0007202~activation of phospholipase C activity,GO:0007601~visual perception,GO:0007602~phototransduction,GO:0016056~rhodopsin mediated signaling pathway,GO:0016059~deactivation of rhodopsin mediated signaling,	GO:0005737~cytoplasm,GO:0005834~heterotrimeric G-protein complex,GO:0005886~plasma membrane,GO:0016028~rhabdomere,	GO:0004871~signal transducer activity,GO:0046982~protein heterodimerization activity,	IPR001632:G-protein, beta subunit,IPR001680:WD40 repeat,IPR015943:WD40/YVTN repeat-like-containing domain,IPR016346:Guanine nucleotide-binding protein, beta subunit,IPR017986:WD40-repeat-containing domain,IPR019775:WD40 repeat, conserved site,IPR020472:G-protein beta WD-40 repeat,	dme04745:Phototransduction - fly,		SM00320:WD40,	Complete proteome,Reference proteome,Repeat,Sensory transduction,Transducer,Vision,WD repeat,	chain:Guanine nucleotide-binding protein subunit beta-2,repeat:WD 1,repeat:WD 2,repeat:WD 3,repeat:WD 4,repeat:WD 5,repeat:WD 6,repeat:WD 7,sequence conflict,
35881	G protein gamma 1(Ggamma1)		GO:0003015~heart process,GO:0003380~establishment or maintenance of cytoskeleton polarity involved in gastrulation,GO:0007015~actin filament organization,GO:0007155~cell adhesion,GO:0007186~G-protein coupled receptor signaling pathway,GO:0007391~dorsal closure,GO:0007637~proboscis extension reflex,GO:0008360~regulation of cell shape,GO:0010470~regulation of gastrulation,GO:0022008~neurogenesis,GO…	GO:0005834~heterotrimeric G-protein complex,GO:0005886~plasma membrane,	GO:0004871~signal transducer activity,	IPR001770:G-protein, gamma subunit,IPR015898:G-protein gamma-like domain,			SM00224:GGL,	Cell membrane,Complete proteome,Lipoprotein,Membrane,Methylation,Prenylation,Reference proteome,Transducer,	chain:Guanine nucleotide-binding protein subunit gamma-1,lipid moiety-binding region:S-geranylgeranyl cysteine,modified residue,propeptide:Removed in mature form,
39031	Galactokinase(Galk)	Carbohydrate transport and metabolism,	GO:0006012~galactose metabolic process,GO:0046835~carbohydrate phosphorylation,	GO:0005737~cytoplasm,GO:0016020~membrane,GO:0070062~extracellular exosome,	GO:0004335~galactokinase activity,GO:0005524~ATP binding,	IPR000705:Galactokinase,IPR006203:GHMP kinase, ATP-binding, conserved site,IPR006204:GHMP kinase N-terminal domain,IPR006206:Mevalonate/galactokinase,IPR013750:GHMP kinase, C-terminal domain,IPR014721:Ribosomal protein S5 domain 2-type fold, subgroup,IPR019539:Galactokinase galactose-binding domain,IPR019741:Galactokinase, conserved site,IPR020568:Ribosomal protein S5 domain 2-type fold,		PIRSF000530:galactokinase,		Complete proteome,Kinase,Proteomics identification,Reference proteome,Transferase,
33373	Glutamate oxaloacetate transaminase 2(Got2)		GO:0006520~cellular amino acid metabolic process,GO:0006531~aspartate metabolic process,GO:0006533~aspartate catabolic process,GO:0006537~glutamate biosynthetic process,GO:0007416~synapse assembly,GO:0045213~neurotransmitter receptor metabolic process,	GO:0005739~mitochondrion,GO:0005759~mitochondrial matrix,GO:0005811~lipid particle,	GO:0004069~L-aspartate:2-oxoglutarate aminotransferase activity,GO:0030170~pyridoxal phosphate binding,GO:0042802~identical protein binding,GO:0080130~L-phenylalanine:2-oxoglutarate aminotransferase activity,	IPR000796:Aspartate/other aminotransferase,IPR004838:Aminotransferases, class-I, pyridoxal-phosphate-binding site,IPR004839:Aminotransferase, class I/classII,IPR015421:Pyridoxal phosphate-dependent transferase, major region, subdomain 1,IPR015424:Pyridoxal phosphate-dependent transferase,	dme00220:Arginine biosynthesis,dme00250:Alanine, aspartate and glutamate metabolism,dme00270:Cysteine and methionine metabolism,dme00330:Arginine and proline metabolism,dme00350:Tyrosine metabolism,dme00360:Phenylalanine metabolism,dme00400:Phenylalanine, tyrosine and tryptophan biosynthesis,dme01100:Metabolic pathways,dme01130:Biosynthesis of antibiotics,dme01200:Carbon metabolism,dme01210:2-Oxo…			Aminotransferase,Complete proteome,Proteomics identification,Reference proteome,Transferase,
33788	Glutamate receptor IIA(GluRIIA)	Amino acid transport and metabolism / Signal transduction mechanisms,	GO:0006816~calcium ion transport,GO:0007268~chemical synaptic transmission,GO:0007274~neuromuscular synaptic transmission,GO:0030510~regulation of BMP signaling pathway,GO:0035249~synaptic transmission, glutamatergic,GO:0046928~regulation of neurotransmitter secretion,GO:0060025~regulation of synaptic activity,GO:0060074~synapse maturation,	GO:0005886~plasma membrane,GO:0008328~ionotropic glutamate receptor complex,GO:0030054~cell junction,GO:0031594~neuromuscular junction,GO:0045211~postsynaptic membrane,GO:0097482~muscle cell postsynaptic density,	GO:0004970~ionotropic glutamate receptor activity,GO:0005234~extracellular-glutamate-gated ion channel activity,GO:0008066~glutamate receptor activity,GO:0015277~kainate selective glutamate receptor activity,GO:0022849~glutamate-gated calcium ion channel activity,	IPR001320:Ionotropic glutamate receptor,IPR001508:NMDA receptor,IPR001828:Extracellular ligand-binding receptor,IPR019594:Glutamate receptor, L-glutamate/glycine-binding,			SM00079:PBPe,SM00918:SM00918,	Cell junction,Cell membrane,Complete proteome,Ion channel,Ion transport,Ligand-gated ion channel,Membrane,Postsynaptic cell membrane,Receptor,Reference proteome,Synapse,Transmembrane,Transmembrane helix,Transport,
38484	Glutamic acid decarboxylase 1(Gad1)		GO:0006538~glutamate catabolic process,GO:0007416~synapse assembly,GO:0007528~neuromuscular junction development,GO:0008345~larval locomotory behavior,GO:0008355~olfactory learning,GO:0009449~gamma-aminobutyric acid biosynthetic process,GO:0009612~response to mechanical stimulus,GO:0019752~carboxylic acid metabolic process,GO:0042136~neurotransmitter biosynthetic process,GO:0045213~neurotransmitt…	GO:0005829~cytosol,	GO:0004351~glutamate decarboxylase activity,GO:0030170~pyridoxal phosphate binding,	IPR002129:Pyridoxal phosphate-dependent decarboxylase,IPR015421:Pyridoxal phosphate-dependent transferase, major region, subdomain 1,IPR015422:Pyridoxal phosphate-dependent transferase, major region, subdomain 2,IPR015424:Pyridoxal phosphate-dependent transferase,IPR021115:Pyridoxal-phosphate binding site,	dme00250:Alanine, aspartate and glutamate metabolism,dme00410:beta-Alanine metabolism,dme00430:Taurine and hypotaurine metabolism,dme00650:Butanoate metabolism,dme01100:Metabolic pathways,			Complete proteome,Decarboxylase,Lyase,Neurotransmitter biosynthesis,Pyridoxal phosphate,Reference proteome,	binding site:Substrate,chain:Glutamate decarboxylase,modified residue,region of interest:Substrate binding,sequence conflict,
37111	Glutathione S transferase E6(GstE6)	Posttranslational modification, protein turnover, chaperones,	GO:0006749~glutathione metabolic process,	GO:0005737~cytoplasm,	GO:0004364~glutathione transferase activity,GO:0004602~glutathione peroxidase activity,	IPR004045:Glutathione S-transferase, N-terminal,IPR004046:Glutathione S-transferase, C-terminal,IPR010987:Glutathione S-transferase, C-terminal-like,IPR012336:Thioredoxin-like fold,	dme00480:Glutathione metabolism,dme00980:Metabolism of xenobiotics by cytochrome P450,dme00982:Drug metabolism - cytochrome P450,			3D-structure,Complete proteome,Proteomics identification,Reference proteome,Transferase,
46156	Grunge(Gug)		GO:0001654~eye development,GO:0002121~inter-male aggressive behavior,GO:0007379~segment specification,GO:0007480~imaginal disc-derived leg morphogenesis,GO:0007526~larval somatic muscle development,GO:0008586~imaginal disc-derived wing vein morphogenesis,GO:0009880~embryonic pattern specification,GO:0035065~regulation of histone acetylation,GO:0035282~segmentation,GO:0042059~negative regulation o…	GO:0005634~nucleus,GO:0005705~polytene chromosome interband,	GO:0003677~DNA binding,GO:0003714~transcription corepressor activity,GO:0004407~histone deacetylase activity,GO:0032041~NAD-dependent histone deacetylase activity (H3-K14 specific),GO:0070491~repressing transcription factor binding,	IPR000949:ELM2 domain,IPR001005:SANT/Myb domain,IPR002951:Atrophin-like,IPR009057:Homeodomain-like,IPR017884:SANT domain,	dme04391:Hippo signaling pathway - fly,		SM00717:SANT,SM01189:SM01189,	3D-structure,Coiled coil,Complete proteome,Hydrolase,Nucleus,Reference proteome,
117346	Gustatory receptor 39a(Gr39a)		GO:0007635~chemosensory behavior,GO:0008049~male courtship behavior,GO:0010037~response to carbon dioxide,GO:0019233~sensory perception of pain,GO:0050909~sensory perception of taste,GO:0050913~sensory perception of bitter taste,	GO:0005886~plasma membrane,GO:0016021~integral component of membrane,GO:0030424~axon,GO:0030425~dendrite,GO:0043025~neuronal cell body,	GO:0004984~olfactory receptor activity,GO:0008527~taste receptor activity,GO:0033041~sweet taste receptor activity,	IPR013604:7TM chemoreceptor,				Alternative splicing,Cell membrane,Complete proteome,Glycoprotein,Membrane,Receptor,Reference proteome,Transducer,Transmembrane,Transmembrane helix,	chain:Putative gustatory receptor 39a, isoform A,chain:Putative gustatory receptor 39a, isoform B,chain:Putative gustatory receptor 39a, isoform C,chain:Putative gustatory receptor 39a, isoform D,glycosylation site:N-linked (GlcNAc...),topological domain:Cytoplasmic,topological domain:Extracellular,transmembrane region,
36076	Histidine decarboxylase(Hdc)		GO:0006520~cellular amino acid metabolic process,GO:0007602~phototransduction,GO:0042423~catecholamine biosynthetic process,GO:0043052~thermotaxis,		GO:0004398~histidine decarboxylase activity,GO:0030170~pyridoxal phosphate binding,	IPR002129:Pyridoxal phosphate-dependent decarboxylase,IPR010977:Aromatic-L-amino-acid decarboxylase,IPR015421:Pyridoxal phosphate-dependent transferase, major region, subdomain 1,IPR015422:Pyridoxal phosphate-dependent transferase, major region, subdomain 2,IPR015424:Pyridoxal phosphate-dependent transferase,IPR021115:Pyridoxal-phosphate binding site,	dme00340:Histidine metabolism,dme01100:Metabolic pathways,			Catecholamine biosynthesis,Complete proteome,Decarboxylase,Lyase,Pyridoxal phosphate,Reference proteome,	chain:Histidine decarboxylase,modified residue,sequence conflict,
36702	Hormone receptor 51(Hr51)		GO:0006351~transcription, DNA-templated,GO:0006357~regulation of transcription from RNA polymerase II promoter,GO:0007411~axon guidance,GO:0016319~mushroom body development,GO:0016322~neuron remodeling,GO:0022008~neurogenesis,GO:0031103~axon regeneration,GO:0043401~steroid hormone mediated signaling pathway,GO:0045475~locomotor rhythm,GO:0048526~imaginal disc-derived wing expansion,GO:0048842~pos…	GO:0005634~nucleus,	GO:0003700~transcription factor activity, sequence-specific DNA binding,GO:0003707~steroid hormone receptor activity,GO:0008270~zinc ion binding,GO:0020037~heme binding,GO:0043565~sequence-specific DNA binding,	IPR000536:Nuclear hormone receptor, ligand-binding, core,IPR001628:Zinc finger, nuclear hormone receptor-type,IPR001723:Steroid hormone receptor,IPR013088:Zinc finger, NHR/GATA-type,			SM00399:ZnF_C4,SM00430:HOLI,	Complete proteome,DNA-binding,Metal-binding,Nucleus,Receptor,Reference proteome,Transcription,Transcription regulation,Zinc,Zinc-finger,
41547	Hugin(Hug)		GO:0007218~neuropeptide signaling pathway,GO:0018990~ecdysis, chitin-based cuticle,GO:0030536~larval feeding behavior,	GO:0005576~extracellular region,GO:0005615~extracellular space,	GO:0005102~receptor binding,GO:0005179~hormone activity,GO:0005184~neuropeptide hormone activity,GO:0008255~ecdysis-triggering hormone activity,GO:0016084~myostimulatory hormone activity,GO:0071855~neuropeptide receptor binding,					Amidation,Cleavage on pair of basic residues,Complete proteome,Direct protein sequencing,Neuropeptide,Reference proteome,Secreted,Signal,	modified residue,peptide:Hug-gamma,peptide:Hug-peptide,peptide:PK-2,signal peptide,
32285	Inositol 1,4,5-triphosphate kinase 2(IP3K2)		GO:0032958~inositol phosphate biosynthetic process,GO:0035071~salivary gland cell autophagic cell death,	GO:0005737~cytoplasm,	GO:0005516~calmodulin binding,GO:0008440~inositol-1,4,5-trisphosphate 3-kinase activity,GO:0048306~calcium-dependent protein binding,	IPR005522:Inositol polyphosphate kinase,	dme00562:Inositol phosphate metabolism,dme01100:Metabolic pathways,dme04070:Phosphatidylinositol signaling system,			Complete proteome,Kinase,Reference proteome,Transferase,
41103	Insulator binding factor 1(Ibf1)		GO:0019233~sensory perception of pain,GO:0031937~positive regulation of chromatin silencing,	GO:0005634~nucleus,	GO:0005515~protein binding,GO:0043035~chromatin insulator sequence binding,GO:0043565~sequence-specific DNA binding,GO:0046982~protein heterodimerization activity,					Complete proteome,Proteomics identification,Reference proteome,
37921	Ion transport peptide(ITP)		GO:0007218~neuropeptide signaling pathway,GO:0007623~circadian rhythm,GO:0042745~circadian sleep/wake cycle,GO:0045475~locomotor rhythm,GO:0046331~lateral inhibition,	GO:0005576~extracellular region,GO:0005615~extracellular space,	GO:0005179~hormone activity,GO:0005184~neuropeptide hormone activity,	IPR001166:Crustacean neurohormone,IPR018251:Crustacean neurohormone, conserved site,				Complete proteome,Reference proteome,Signal,
33708	Jonah 25Bi(Jon25Bi)		GO:0006508~proteolysis,		GO:0004175~endopeptidase activity,GO:0004252~serine-type endopeptidase activity,	IPR001254:Peptidase S1,IPR001314:Peptidase S1A, chymotrypsin-type,IPR009003:Trypsin-like cysteine/serine peptidase domain,IPR018114:Peptidase S1, trypsin family, active site,			SM00020:Tryp_SPc,	Complete proteome,Disulfide bond,Hydrolase,Protease,Proteomics identification,Reference proteome,Serine protease,Signal,
36779	Juvenile hormone esterase duplication(Jhedup)		GO:0007158~neuron cell-cell adhesion,GO:0007416~synapse assembly,GO:0050804~modulation of synaptic transmission,	GO:0005887~integral component of plasma membrane,GO:0009986~cell surface,GO:0045202~synapse,	GO:0004872~receptor activity,GO:0016787~hydrolase activity,GO:0042043~neurexin family protein binding,GO:0052689~carboxylic ester hydrolase activity,	IPR002018:Carboxylesterase, type B,IPR019819:Carboxylesterase type B, conserved site,IPR019826:Carboxylesterase type B, active site,				Complete proteome,Hydrolase,Proteomics identification,Reference proteome,Signal,
42475	Kctd12-like(Ktl)		GO:0002121~inter-male aggressive behavior,GO:0008049~male courtship behavior,GO:0030431~sleep,GO:0051260~protein homooligomerization,GO:0090327~negative regulation of locomotion involved in locomotory behavior,	GO:0005886~plasma membrane,		IPR000210:BTB/POZ-like,IPR003131:Potassium channel tetramerisation-type BTB domain,IPR011333:BTB/POZ fold,			SM00225:BTB,	Complete proteome,Proteomics identification,Reference proteome,
33861	Kruppel homolog 1(Kr-h1)	General function prediction only,	GO:0006355~regulation of transcription, DNA-templated,GO:0007552~metamorphosis,GO:0010977~negative regulation of neuron projection development,GO:0035075~response to ecdysone,GO:0045316~negative regulation of compound eye photoreceptor development,	GO:0005634~nucleus,	GO:0003676~nucleic acid binding,GO:0003677~DNA binding,GO:0003700~transcription factor activity, sequence-specific DNA binding,GO:0046872~metal ion binding,	IPR007087:Zinc finger, C2H2,IPR013087:Zinc finger C2H2-type/integrase DNA-binding domain,IPR015880:Zinc finger, C2H2-like,			SM00355:ZnF_C2H2,	Alternative splicing,Complete proteome,Developmental protein,DNA-binding,Metal-binding,Reference proteome,Repeat,Zinc,Zinc-finger,	chain:Krueppel homologous protein 1,compositionally biased region:Gln-rich,compositionally biased region:Ser/Thr-rich,sequence conflict,splice variant,zinc finger region:C2H2-type 1,zinc finger region:C2H2-type 2,zinc finger region:C2H2-type 3,zinc finger region:C2H2-type 4,zinc finger region:C2H2-type 5,zinc finger region:C2H2-type 6,zinc finger region:C2H2-type 7,zinc finger region:C2H2-type 8,
53567	La related protein(larp)		GO:0000001~mitochondrion inheritance,GO:0007053~spindle assembly involved in male meiosis,GO:0007140~male meiosis,GO:0035071~salivary gland cell autophagic cell death,GO:0035186~syncytial blastoderm mitotic cell cycle,GO:0048102~autophagic cell death,	GO:0005737~cytoplasm,GO:0005739~mitochondrion,GO:0005829~cytosol,	GO:0003723~RNA binding,	IPR006607:Protein of unknown function DM15,IPR006630:RNA-binding protein Lupus La,IPR011991:Winged helix-turn-helix DNA-binding domain,			SM00684:DM15,SM00715:LA,	Alternative splicing,Complete proteome,Cytoplasm,Meiosis,Phosphoprotein,Proteomics identification,Reference proteome,RNA-binding,	chain:La-related protein,compositionally biased region:Poly-Ala,compositionally biased region:Poly-Asn,compositionally biased region:Poly-Gln,compositionally biased region:Poly-Pro,compositionally biased region:Poly-Ser,compositionally biased region:Poly-Thr,domain:HTH La-type RNA-binding,modified residue,sequence conflict,splice variant,
37963	Larval cuticle protein 9(Lcp9)		GO:0008363~larval chitin-based cuticle development,GO:0040003~chitin-based cuticle development,	GO:0005576~extracellular region,GO:0005615~extracellular space,GO:0031012~extracellular matrix,	GO:0008010~structural constituent of chitin-based larval cuticle,GO:0042302~structural constituent of cuticle,	IPR000618:Insect cuticle protein,				Complete proteome,Cuticle,Direct protein sequencing,Reference proteome,Signal,	chain:Larval cuticle protein 9,domain:Chitin-binding type R&R,signal peptide,
45326	Larval serum protein 2(Lsp2)		GO:0008045~motor neuron axon guidance,GO:0016201~synaptic target inhibition,	GO:0005616~larval serum protein complex,GO:0005811~lipid particle,	GO:0045735~nutrient reservoir activity,	IPR000896:Hemocyanin/hexamerin middle domain,IPR005203:Hemocyanin, C-terminal,IPR005204:Hemocyanin, N-terminal,IPR008922:Uncharacterised domain, di-copper centre,IPR013788:Hemocyanin/hexamerin,IPR014756:Immunoglobulin E-set,				Complete proteome,Glycoprotein,Reference proteome,Secreted,Signal,Storage protein,	chain:Larval serum protein 2,glycosylation site:N-linked (GlcNAc...),sequence conflict,signal peptide,
35715	Leucine-rich repeat(LRR)		GO:0006955~immune response,GO:0017085~response to insecticide,GO:0042384~cilium assembly,GO:0050777~negative regulation of immune response,GO:0060271~cilium morphogenesis,GO:1901223~negative regulation of NIK/NF-kappaB signaling,	GO:0005927~muscle tendon junction,		IPR001611:Leucine-rich repeat,				Complete proteome,Proteomics identification,Reference proteome,
2768687	Lipophorin receptor 1(LpR1)		GO:0006898~receptor-mediated endocytosis,	GO:0016021~integral component of membrane,	GO:0004872~receptor activity,GO:0005509~calcium ion binding,	IPR000033:LDLR class B repeat,IPR000152:EGF-type aspartate/asparagine hydroxylation site,IPR000742:Epidermal growth factor-like domain,IPR001881:EGF-like calcium-binding,IPR002172:Low-density lipoprotein (LDL) receptor class A repeat,IPR009030:Insulin-like growth factor binding protein, N-terminal,IPR011042:Six-bladed beta-propeller, TolB-like,IPR013032:EGF-like, conserved site,IPR018097:EGF-like…			SM00135:LY,SM00179:EGF_CA,SM00181:EGF,SM00192:LDLa,	Complete proteome,Disulfide bond,EGF-like domain,Membrane,Receptor,Reference proteome,Repeat,Signal,Transmembrane,Transmembrane helix,
34064	Lysine ketoglutarate reductase/saccharopine dehydrogenase(LKRSDH)		GO:0031060~regulation of histone methylation,GO:0034969~histone arginine methylation,GO:0055114~oxidation-reduction process,		GO:0004754~saccharopine dehydrogenase (NAD+, L-lysine-forming) activity,GO:0016491~oxidoreductase activity,	IPR005097:Saccharopine dehydrogenase / Homospermidine synthase,IPR007698:Alanine dehydrogenase/PNT, NAD(H)-binding domain,IPR007886:Alanine dehydrogenase/pyridine nucleotide transhydrogenase, N-terminal,IPR016040:NAD(P)-binding domain,	dme00310:Lysine degradation,dme01100:Metabolic pathways,dme01130:Biosynthesis of antibiotics,		SM01002:SM01002,SM01003:SM01003,	Complete proteome,Oxidoreductase,Proteomics identification,Reference proteome,
35827	Maltase A4(Mal-A4)		GO:0005975~carbohydrate metabolic process,		GO:0003824~catalytic activity,GO:0004558~alpha-1,4-glucosidase activity,GO:0032450~maltose alpha-glucosidase activity,	IPR006047:Glycosyl hydrolase, family 13, catalytic domain,IPR013781:Glycoside hydrolase, catalytic domain,IPR015902:Glycoside hydrolase, family 13,IPR017853:Glycoside hydrolase, superfamily,	dme00052:Galactose metabolism,dme00500:Starch and sucrose metabolism,dme01100:Metabolic pathways,		SM00642:Aamy,	Complete proteome,Glycosidase,Hydrolase,Reference proteome,Signal,
36285	Metallophosphoesterase(Mppe)		GO:0006470~protein dephosphorylation,GO:0006888~ER to Golgi vesicle-mediated transport,	GO:0005794~Golgi apparatus,GO:0016021~integral component of membrane,	GO:0016791~phosphatase activity,	IPR004843:Metallophosphoesterase domain,				Complete proteome,Hydrolase,Membrane,Reference proteome,Transmembrane,Transmembrane helix,
319014	Mucin related 29B(Mur29B)			GO:0031012~extracellular matrix,	GO:0005201~extracellular matrix structural constituent,					Complete proteome,Reference proteome,Signal,
34258	Multicopper oxidase-1(Mco1)		GO:0006826~iron ion transport,GO:0033215~iron assimilation by reduction and transport,GO:0034755~iron ion transmembrane transport,GO:0055072~iron ion homeostasis,GO:0055114~oxidation-reduction process,	GO:0009986~cell surface,GO:0031233~intrinsic component of external side of plasma membrane,GO:0033573~high-affinity iron permease complex,GO:0045178~basal part of cell,	GO:0004322~ferroxidase activity,GO:0005507~copper ion binding,	IPR001117:Multicopper oxidase, type 1,IPR002355:Multicopper oxidase, copper-binding site,IPR008972:Cupredoxin,IPR011706:Multicopper oxidase, type 2,IPR011707:Multicopper oxidase, type 3,				Complete proteome,Copper,Metal-binding,Oxidoreductase,Reference proteome,
47895	NAD-dependent methylenetetrahydrofolate dehydrogenase(Nmdmc)	Coenzyme metabolism,	GO:0005975~carbohydrate metabolic process,GO:0006730~one-carbon metabolic process,GO:0009256~10-formyltetrahydrofolate metabolic process,GO:0009396~folic acid-containing compound biosynthetic process,GO:0046653~tetrahydrofolate metabolic process,GO:0055114~oxidation-reduction process,	GO:0005739~mitochondrion,	GO:0000287~magnesium ion binding,GO:0004329~formate-tetrahydrofolate ligase activity,GO:0004477~methenyltetrahydrofolate cyclohydrolase activity,GO:0004487~methylenetetrahydrofolate dehydrogenase (NAD+) activity,GO:0004488~methylenetetrahydrofolate dehydrogenase (NADP+) activity,GO:0042301~phosphate ion binding,	IPR000672:Tetrahydrofolate dehydrogenase/cyclohydrolase,IPR016040:NAD(P)-binding domain,IPR020630:Tetrahydrofolate dehydrogenase/cyclohydrolase, catalytic domain,IPR020631:Tetrahydrofolate dehydrogenase/cyclohydrolase, NAD(P)-binding domain,IPR020867:Tetrahydrofolate dehydrogenase/cyclohydrolase, conserved site,	dme00670:One carbon pool by folate,dme01100:Metabolic pathways,			Alternative splicing,Complete proteome,Hydrolase,Ligase,Magnesium,Mitochondrion,Multifunctional enzyme,NAD,One-carbon metabolism,Oxidoreductase,Reference proteome,Transit peptide,	chain:Bifunctional methylenetetrahydrofolate dehydrogenase/cyclohydrolase, mitochondrial,sequence conflict,splice variant,transit peptide:Mitochondrion,
39255	Na[+]-dependent inorganic phosphate cotransporter type III(NaPi-III)		GO:0044341~sodium-dependent phosphate transport,	GO:0005887~integral component of plasma membrane,GO:0016020~membrane,	GO:0005315~inorganic phosphate transmembrane transporter activity,GO:0015319~sodium:inorganic phosphate symporter activity,GO:0015321~sodium-dependent phosphate transmembrane transporter activity,	IPR001204:Phosphate transporter,				Complete proteome,Membrane,Phosphate transport,Reference proteome,Transmembrane,Transmembrane helix,Transport,
42402	Neuroligin 4(Nlg4)		GO:0030431~sleep,GO:0051932~synaptic transmission, GABAergic,	GO:0005615~extracellular space,GO:0016021~integral component of membrane,	GO:0052689~carboxylic ester hydrolase activity,	IPR002018:Carboxylesterase, type B,IPR019819:Carboxylesterase type B, conserved site,	dme00983:Drug metabolism - other enzymes,dme01100:Metabolic pathways,			Complete proteome,Hydrolase,Membrane,Reference proteome,Signal,Transmembrane,Transmembrane helix,
33072	Niemann-Pick type C-1b(Npc1b)		GO:0007391~dorsal closure,GO:0007417~central nervous system development,GO:0007422~peripheral nervous system development,GO:0030299~intestinal cholesterol absorption,	GO:0016021~integral component of membrane,		IPR000731:Sterol-sensing domain,IPR003392:Patched,	dme04142:Lysosome,			Cell membrane,Cholesterol metabolism,Complete proteome,Disulfide bond,Glycoprotein,Lipid metabolism,Membrane,Reference proteome,Signal,Steroid metabolism,Sterol metabolism,Transmembrane,Transmembrane helix,
34495	Nitric oxide synthase(Nos)		GO:0002027~regulation of heart rate,GO:0006809~nitric oxide biosynthetic process,GO:0007263~nitric oxide mediated signal transduction,GO:0007399~nervous system development,GO:0007416~synapse assembly,GO:0007444~imaginal disc development,GO:0008156~negative regulation of DNA replication,GO:0008285~negative regulation of cell proliferation,GO:0031284~positive regulation of guanylate cyclase activit…	GO:0005777~peroxisome,	GO:0004517~nitric-oxide synthase activity,GO:0005506~iron ion binding,GO:0005516~calmodulin binding,GO:0010181~FMN binding,GO:0020037~heme binding,GO:0050660~flavin adenine dinucleotide binding,GO:0050661~NADP binding,	IPR001094:Flavodoxin,IPR001433:Oxidoreductase FAD/NAD(P)-binding,IPR001709:Flavoprotein pyridine nucleotide cytochrome reductase,IPR003097:FAD-binding, type 1,IPR004030:Nitric oxide synthase, oxygenase domain,IPR008254:Flavodoxin/nitric oxide synthase,IPR012144:Nitric-oxide synthase, metazoa,IPR017927:Ferredoxin reductase-type FAD-binding domain,IPR017938:Riboflavin synthase-like beta-barrel,IPR0…		PIRSF000333:nitric-oxide synthase, inducible,		3D-structure,Alternative splicing,Calmodulin-binding,Complete proteome,FAD,Flavoprotein,FMN,Heme,Iron,Metal-binding,NADP,Oxidoreductase,Reference proteome,	chain:Nitric oxide synthase,compositionally biased region:Gln-rich,compositionally biased region:Poly-Gly,domain:FAD-binding FR-type,domain:Flavodoxin-like,metal ion-binding site:Iron (heme axial ligand),nucleotide phosphate-binding region:FAD,nucleotide phosphate-binding region:FMN,nucleotide phosphate-binding region:NADP,region of interest:Calmodulin-binding,sequence conflict,splice variant,
36564	O-fucosyltransferase 1(O-fut1)		GO:0006004~fucose metabolic process,GO:0006355~regulation of transcription, DNA-templated,GO:0006493~protein O-linked glycosylation,GO:0006897~endocytosis,GO:0007219~Notch signaling pathway,GO:0008593~regulation of Notch signaling pathway,GO:0009790~embryo development,GO:0016266~O-glycan processing,GO:0016337~single organismal cell-cell adhesion,GO:0030163~protein catabolic process,GO:0036066~pro…	GO:0005737~cytoplasm,GO:0005783~endoplasmic reticulum,GO:0005794~Golgi apparatus,GO:0030173~integral component of Golgi membrane,GO:0031410~cytoplasmic vesicle,	GO:0005112~Notch binding,GO:0008417~fucosyltransferase activity,GO:0046922~peptide-O-fucosyltransferase activity,	IPR019378:GDP-fucose protein O-fucosyltransferase,	dme00514:Other types of O-glycan biosynthesis,			Carbohydrate metabolism,Complete proteome,Disulfide bond,Endoplasmic reticulum,Fucose metabolism,Glycoprotein,Glycosyltransferase,Notch signaling pathway,Proteomics identification,Reference proteome,Signal,Transferase,	chain:GDP-fucose protein O-fucosyltransferase 1,glycosylation site:N-linked (GlcNAc...),sequence conflict,signal peptide,
35980	Odorant receptor 45b(Or45b)		GO:0050911~detection of chemical stimulus involved in sensory perception of smell,	GO:0005886~plasma membrane,GO:0016021~integral component of membrane,GO:0032590~dendrite membrane,	GO:0004984~olfactory receptor activity,GO:0005549~odorant binding,	IPR004117:Olfactory receptor, Drosophila,				Cell membrane,Complete proteome,Membrane,Olfaction,Receptor,Reference proteome,Sensory transduction,Transducer,Transmembrane,Transmembrane helix,	chain:Putative odorant receptor 45b,topological domain:Cytoplasmic,topological domain:Extracellular,transmembrane region,
34031	Odorant-binding protein 28a(Obp28a)		GO:0007606~sensory perception of chemical stimulus,	GO:0005576~extracellular region,	GO:0005549~odorant binding,GO:0005550~pheromone binding,	IPR006170:Pheromone/general odorant binding protein,			SM00708:PhBP,	Complete proteome,Disulfide bond,Reference proteome,Secreted,Signal,	chain:Pheromone-binding protein-related protein 5,disulfide bond,sequence conflict,signal peptide,
37264	Odorant-binding protein 56a(Obp56a)		GO:0006810~transport,GO:0007606~sensory perception of chemical stimulus,GO:0007608~sensory perception of smell,GO:0019236~response to pheromone,GO:0042048~olfactory behavior,	GO:0005576~extracellular region,	GO:0005549~odorant binding,	IPR006170:Pheromone/general odorant binding protein,			SM00708:PhBP,	Complete proteome,Disulfide bond,Glycoprotein,Olfaction,Polymorphism,Reference proteome,Secreted,Sensory transduction,Signal,Transport,	chain:General odorant-binding protein 56a,disulfide bond,glycosylation site:N-linked (GlcNAc...),sequence variant,signal peptide,
40738	Odorant-binding protein 83b(Obp83b)		GO:0007606~sensory perception of chemical stimulus,	GO:0005576~extracellular region,	GO:0005549~odorant binding,	IPR006170:Pheromone/general odorant binding protein,			SM00708:PhBP,	Complete proteome,Disulfide bond,Reference proteome,Secreted,Signal,	chain:Pheromone-binding protein-related protein 6,disulfide bond,sequence conflict,signal peptide,
42891	Organic cation transporter(Orct)		GO:0006811~ion transport,GO:0006915~apoptotic process,GO:0015695~organic cation transport,GO:0055085~transmembrane transport,	GO:0005887~integral component of plasma membrane,GO:0016021~integral component of membrane,	GO:0015101~organic cation transmembrane transporter activity,GO:0022857~transmembrane transporter activity,GO:0022891~substrate-specific transmembrane transporter activity,	IPR005828:General substrate transporter,IPR020846:Major facilitator superfamily domain,				Complete proteome,Glycoprotein,Ion transport,Membrane,Reference proteome,Transmembrane,Transmembrane helix,Transport,	chain:Organic cation transporter protein,glycosylation site:N-linked (GlcNAc...),sequence conflict,topological domain:Cytoplasmic,topological domain:Extracellular,transmembrane region,
35766	Ornithine decarboxylase 1(Odc1)	Amino acid transport and metabolism,	GO:0006596~polyamine biosynthetic process,GO:0033387~putrescine biosynthetic process from ornithine,	GO:0005737~cytoplasm,	GO:0003824~catalytic activity,GO:0004586~ornithine decarboxylase activity,	IPR000183:Ornithine/DAP/Arg decarboxylase,IPR002433:Ornithine decarboxylase,IPR009006:Alanine racemase/group IV decarboxylase, C-terminal,IPR022643:Orn/DAP/Arg decarboxylase 2, C-terminal,IPR022644:Orn/DAP/Arg decarboxylase 2, N-terminal,IPR022653:Orn/DAP/Arg decarboxylase 2, pyridoxal-phosphate binding site,IPR022657:Orn/DAP/Arg decarboxylase 2, conserved site,	dme00330:Arginine and proline metabolism,dme00480:Glutathione metabolism,dme01100:Metabolic pathways,dme01130:Biosynthesis of antibiotics,			Complete proteome,Decarboxylase,Lyase,Polyamine biosynthesis,Pyridoxal phosphate,Reference proteome,	active site:Proton donor; shared with dimeric partner,chain:Ornithine decarboxylase 1,modified residue,sequence conflict,
34638	Phaedra 2(Phae2)		GO:0006508~proteolysis,		GO:0004252~serine-type endopeptidase activity,	IPR001254:Peptidase S1,IPR001314:Peptidase S1A, chymotrypsin-type,IPR009003:Trypsin-like cysteine/serine peptidase domain,IPR018114:Peptidase S1, trypsin family, active site,			SM00020:Tryp_SPc,	Complete proteome,Disulfide bond,Hydrolase,Reference proteome,Signal,
42644	Phosphatidylethanolamine-binding protein 1(Pebp1)		GO:0002759~regulation of antimicrobial humoral response,GO:0050829~defense response to Gram-negative bacterium,GO:0050830~defense response to Gram-positive bacterium,			IPR008914:Phosphatidylethanolamine-binding protein PEBP,				Complete proteome,Proteomics identification,Reference proteome,
31247	Phosphatidylinositol 4-kinase III alpha(PI4KIIIalpha)		GO:0007009~plasma membrane organization,GO:0007015~actin filament organization,GO:0007293~germarium-derived egg chamber formation,GO:0008582~regulation of synaptic growth at neuromuscular junction,GO:0016310~phosphorylation,GO:0030010~establishment of cell polarity,GO:0035329~hippo signaling,GO:0046854~phosphatidylinositol phosphorylation,GO:0048015~phosphatidylinositol-mediated signaling,GO:0048…	GO:0005622~intracellular,GO:0005886~plasma membrane,	GO:0004430~1-phosphatidylinositol 4-kinase activity,GO:0016301~kinase activity,	IPR000403:Phosphatidylinositol 3-/4-kinase, catalytic domain,IPR001263:Phosphoinositide 3-kinase, accessory (PIK) domain,IPR011009:Protein kinase-like domain,IPR015433:Phosphatidylinositol Kinase,IPR016024:Armadillo-type fold,IPR018936:Phosphatidylinositol 3/4-kinase, conserved site,	dme00562:Inositol phosphate metabolism,dme01100:Metabolic pathways,dme04070:Phosphatidylinositol signaling system,		SM00145:PI3Ka,SM00146:PI3Kc,	Complete proteome,Kinase,Proteomics identification,Reference proteome,Transferase,
38753	Phosphoribosylamidotransferase 2(Prat2)		GO:0006189~'de novo' IMP biosynthetic process,GO:0009113~purine nucleobase biosynthetic process,GO:0009116~nucleoside metabolic process,		GO:0004044~amidophosphoribosyltransferase activity,GO:0046872~metal ion binding,GO:0051536~iron-sulfur cluster binding,	IPR000836:Phosphoribosyltransferase domain,IPR005854:Amidophosphoribosyl transferase,IPR017932:Glutamine amidotransferase type 2 domain,	dme00230:Purine metabolism,dme00250:Alanine, aspartate and glutamate metabolism,dme01100:Metabolic pathways,dme01130:Biosynthesis of antibiotics,	PIRSF000485:amidophosphoribosyltransferase,		Complete proteome,Glycosyltransferase,Iron,Iron-sulfur,Metal-binding,Purine biosynthesis,Reference proteome,Transferase,
33288	Pinocchio(Pino)		GO:0007608~sensory perception of smell,GO:0042048~olfactory behavior,GO:2001020~regulation of response to DNA damage stimulus,							Alternative splicing,Coiled coil,Complete proteome,Olfaction,Reference proteome,Sensory transduction,
31593	Protein interacting with APP tail-1(Pat1)		GO:0006909~phagocytosis,GO:0007018~microtubule-based movement,GO:0045451~pole plasm oskar mRNA localization,GO:0060632~regulation of microtubule-based movement,	GO:0005871~kinesin complex,		IPR011990:Tetratricopeptide-like helical,IPR013026:Tetratricopeptide repeat-containing domain,IPR019734:Tetratricopeptide repeat,			SM00028:TPR,	Complete proteome,Reference proteome,
41880	RIM-binding protein(Rbp)		GO:0007274~neuromuscular synaptic transmission,GO:0010906~regulation of glucose metabolic process,GO:0048789~cytoskeletal matrix organization at active zone,	GO:0048788~cytoskeleton of presynaptic active zone,		IPR001452:Src homology-3 domain,IPR003961:Fibronectin, type III,IPR011511:Variant SH3,IPR013783:Immunoglobulin-like fold,			SM00060:FN3,SM00326:SH3,	3D-structure,Coiled coil,Complete proteome,Proteomics identification,Reference proteome,
39054	Resistant to dieldrin(Rdl)		GO:0002121~inter-male aggressive behavior,GO:0006811~ion transport,GO:0009612~response to mechanical stimulus,GO:0030431~sleep,GO:0042493~response to drug,GO:0042749~regulation of circadian sleep/wake cycle,GO:0050805~negative regulation of synaptic transmission,GO:0090328~regulation of olfactory learning,	GO:0005886~plasma membrane,GO:0016021~integral component of membrane,GO:0030054~cell junction,GO:0030424~axon,GO:0030425~dendrite,GO:0034707~chloride channel complex,GO:0045202~synapse,GO:0045211~postsynaptic membrane,	GO:0004890~GABA-A receptor activity,GO:0005230~extracellular ligand-gated ion channel activity,GO:0005254~chloride channel activity,GO:0016917~GABA receptor activity,GO:0022851~GABA-gated chloride ion channel activity,GO:0030594~neurotransmitter receptor activity,	IPR002289:Gamma-aminobutyric-acid A receptor, beta subunit,IPR006028:Gamma-aminobutyric acid A receptor,IPR006029:Neurotransmitter-gated ion-channel transmembrane domain,IPR006201:Neurotransmitter-gated ion-channel,IPR006202:Neurotransmitter-gated ion-channel ligand-binding,IPR018000:Neurotransmitter-gated ion-channel, conserved site,	dme04080:Neuroactive ligand-receptor interaction,			Alternative splicing,Cell junction,Cell membrane,Chloride,Chloride channel,Complete proteome,Disulfide bond,Glycoprotein,Ion channel,Ion transport,Ligand-gated ion channel,Membrane,Postsynaptic cell membrane,Receptor,Reference proteome,RNA editing,Signal,Synapse,Transmembrane,Transmembrane helix,Transport,	chain:Gamma-aminobutyric acid receptor subunit beta,compositionally biased region:Gly-rich,disulfide bond,glycosylation site:N-linked (GlcNAc...),sequence conflict,sequence variant,signal peptide,splice variant,topological domain:Cytoplasmic,topological domain:Extracellular,transmembrane region,
39629	Reversion-inducing-cysteine-rich protein with kazal motifs(Reck)		GO:0010951~negative regulation of endopeptidase activity,GO:0030198~extracellular matrix organization,	GO:0016020~membrane,	GO:0008191~metalloendopeptidase inhibitor activity,	IPR002350:Kazal domain,			SM00280:KAZAL,	Complete proteome,Reference proteome,Signal,
39887	Rhodopsin 4(Rh4)		GO:0007186~G-protein coupled receptor signaling pathway,GO:0007601~visual perception,GO:0007602~phototransduction,GO:0007604~phototransduction, UV,GO:0009589~detection of UV,GO:0018298~protein-chromophore linkage,	GO:0005887~integral component of plasma membrane,GO:0016021~integral component of membrane,	GO:0004930~G-protein coupled receptor activity,GO:0008020~G-protein coupled photoreceptor activity,GO:0009881~photoreceptor activity,	IPR000276:G protein-coupled receptor, rhodopsin-like,IPR000856:Opsin RH3/RH4,IPR017452:GPCR, rhodopsin-like, 7TM,IPR027430:Visual pigments (opsins) retinal binding site,				Chromophore,Complete proteome,Disulfide bond,G-protein coupled receptor,Glycoprotein,Membrane,Phosphoprotein,Photoreceptor protein,Receptor,Reference proteome,Retinal protein,Sensory transduction,Transducer,Transmembrane,Transmembrane helix,Vision,	chain:Opsin Rh4,disulfide bond,glycosylation site:N-linked (GlcNAc...),modified residue,sequence conflict,topological domain:Cytoplasmic,topological domain:Extracellular,transmembrane region,
34615	Rhodopsin 5(Rh5)		GO:0007186~G-protein coupled receptor signaling pathway,GO:0007601~visual perception,GO:0007602~phototransduction,GO:0007605~sensory perception of sound,GO:0009416~response to light stimulus,GO:0009588~UV-A, blue light phototransduction,GO:0016038~absorption of visible light,GO:0018298~protein-chromophore linkage,GO:0043153~entrainment of circadian clock by photoperiod,GO:0071482~cellular respons…	GO:0005887~integral component of plasma membrane,GO:0016021~integral component of membrane,GO:0016028~rhabdomere,	GO:0004930~G-protein coupled receptor activity,GO:0008020~G-protein coupled photoreceptor activity,GO:0009881~photoreceptor activity,	IPR000276:G protein-coupled receptor, rhodopsin-like,IPR000856:Opsin RH3/RH4,IPR017452:GPCR, rhodopsin-like, 7TM,IPR027430:Visual pigments (opsins) retinal binding site,				Chromophore,Complete proteome,Disulfide bond,G-protein coupled receptor,Glycoprotein,Membrane,Phosphoprotein,Photoreceptor protein,Receptor,Reference proteome,Retinal protein,Sensory transduction,Transducer,Transmembrane,Transmembrane helix,Vision,	chain:Opsin Rh5,disulfide bond,glycosylation site:N-linked (GlcNAc...),modified residue,sequence conflict,topological domain:Cytoplasmic,topological domain:Extracellular,transmembrane region,
37684	Ribosomal protein L22-like(RpL22-like)		GO:0002181~cytoplasmic translation,GO:0006412~translation,	GO:0005840~ribosome,GO:0022625~cytosolic large ribosomal subunit,	GO:0003735~structural constituent of ribosome,	IPR002671:Ribosomal protein L22e,				Complete proteome,Proteomics identification,Reference proteome,Ribonucleoprotein,Ribosomal protein,
33701	Salivary gland secretion 1(Sgs1)			GO:0031012~extracellular matrix,	GO:0005201~extracellular matrix structural constituent,					Complete proteome,Reference proteome,Signal,
33621	Scavenger receptor class C, type I(Sr-CI)		GO:0006909~phagocytosis,GO:0006955~immune response,GO:0009617~response to bacterium,GO:0050829~defense response to Gram-negative bacterium,	GO:0016020~membrane,GO:0016021~integral component of membrane,	GO:0005044~scavenger receptor activity,GO:0030247~polysaccharide binding,	IPR000436:Sushi/SCR/CCP,IPR000998:MAM domain,IPR001212:Somatomedin B domain,IPR013320:Concanavalin A-like lectin/glucanase, subgroup,			SM00032:CCP,SM00137:MAM,SM00201:SO,	Complete proteome,Disulfide bond,Membrane,Receptor,Reference proteome,Signal,Transmembrane,Transmembrane helix,
31587	Serine pyruvate aminotransferase(Spat)		GO:0009436~glyoxylate catabolic process,GO:0019265~glycine biosynthetic process, by transamination of glyoxylate,	GO:0005777~peroxisome,GO:0005811~lipid particle,	GO:0004760~serine-pyruvate transaminase activity,GO:0008453~alanine-glyoxylate transaminase activity,	IPR000192:Aminotransferase, class V/Cysteine desulfurase,IPR015421:Pyridoxal phosphate-dependent transferase, major region, subdomain 1,IPR015422:Pyridoxal phosphate-dependent transferase, major region, subdomain 2,IPR015424:Pyridoxal phosphate-dependent transferase,IPR020578:Aminotransferase class-V pyridoxal-phosphate binding site,IPR024169:Serine-pyruvate aminotransferase/2-aminoethylphosphona…	dme00250:Alanine, aspartate and glutamate metabolism,dme00260:Glycine, serine and threonine metabolism,dme00630:Glyoxylate and dicarboxylate metabolism,dme01100:Metabolic pathways,dme01130:Biosynthesis of antibiotics,dme01200:Carbon metabolism,dme04146:Peroxisome,	PIRSF000524:serine--pyruvate aminotransferase,		Aminotransferase,Complete proteome,Proteomics identification,Pyridoxal phosphate,Pyruvate,Reference proteome,Transferase,
40833	Sex combs reduced(Scr)		GO:0007275~multicellular organism development,GO:0007379~segment specification,GO:0007381~specification of segmental identity, labial segment,GO:0007432~salivary gland boundary specification,GO:0007494~midgut development,GO:0007548~sex differentiation,GO:0045498~sex comb development,GO:0045944~positive regulation of transcription from RNA polymerase II promoter,	GO:0005634~nucleus,	GO:0000977~RNA polymerase II regulatory region sequence-specific DNA binding,GO:0003700~transcription factor activity, sequence-specific DNA binding,GO:0042803~protein homodimerization activity,GO:0043565~sequence-specific DNA binding,	IPR001356:Homeodomain,IPR001827:Homeobox protein, antennapedia type, conserved site,IPR009057:Homeodomain-like,IPR017970:Homeobox, conserved site,IPR017995:Homeobox protein, antennapedia type,IPR020479:Homeodomain, metazoa,			SM00389:HOX,	3D-structure,Complete proteome,Developmental protein,DNA-binding,Homeobox,Nucleus,Phosphoprotein,Reference proteome,	chain:Homeotic protein Sex combs reduced,compositionally biased region:Asn-rich,compositionally biased region:Gln-rich,compositionally biased region:Gly-rich,DNA-binding region:Homeobox,helix,modified residue,sequence conflict,short sequence motif:Antp-type hexapeptide,
32780	Shaker(Sh)		GO:0001508~action potential,GO:0006813~potassium ion transport,GO:0007611~learning or memory,GO:0007619~courtship behavior,GO:0007629~flight behavior,GO:0007637~proboscis extension reflex,GO:0008345~larval locomotory behavior,GO:0009584~detection of visible light,GO:0030431~sleep,GO:0045187~regulation of circadian sleep/wake cycle, sleep,GO:0045838~positive regulation of membrane potential,GO:004…	GO:0008076~voltage-gated potassium channel complex,GO:0016021~integral component of membrane,	GO:0005249~voltage-gated potassium channel activity,GO:0005251~delayed rectifier potassium channel activity,GO:0022843~voltage-gated cation channel activity,	IPR000210:BTB/POZ-like,IPR003131:Potassium channel tetramerisation-type BTB domain,IPR003968:Potassium channel, voltage dependent, Kv,IPR003972:Potassium channel, voltage dependent, Kv1,IPR004048:Potassium channel, voltage dependent, Kv1.1,IPR005821:Ion transport domain,IPR011333:BTB/POZ fold,IPR027359:Voltage-dependent potassium channel, four helix bundle domain,			SM00225:BTB,	3D-structure,Alternative splicing,Cell membrane,Coiled coil,Complete proteome,Glycoprotein,Ion channel,Ion transport,Membrane,Potassium,Potassium channel,Potassium transport,Reference proteome,RNA editing,Transmembrane,Transmembrane helix,Transport,Voltage-gated channel,	chain:Potassium voltage-gated channel protein Shaker,compositionally biased region:Gln-rich,compositionally biased region:Poly-Ala,glycosylation site:N-linked (GlcNAc...),helix,mutagenesis site,sequence conflict,sequence variant,short sequence motif:Selectivity filter,splice variant,topological domain:Cytoplasmic,transmembrane region,
38261	Succinyl-CoA:3-ketoacid CoA transferase(SCOT)	Lipid metabolism,	GO:0008152~metabolic process,GO:0046952~ketone body catabolic process,	GO:0005739~mitochondrion,GO:0005759~mitochondrial matrix,	GO:0008260~3-oxoacid CoA-transferase activity,	IPR004163:Coenzyme A transferase binding site,IPR004164:Coenzyme A transferase active site,IPR004165:Coenzyme A transferase family I,IPR012791:3-oxoacid CoA-transferase, subunit B,IPR012792:3-oxoacid CoA-transferase, subunit A,IPR014388:3-oxoacid CoA-transferase,	dme00072:Synthesis and degradation of ketone bodies,dme00280:Valine, leucine and isoleucine degradation,dme00650:Butanoate metabolism,	PIRSF000858:3-oxoacid CoA-transferase,	SM00882:SM00882,	3D-structure,Complete proteome,Mitochondrion,Proteomics identification,Reference proteome,Transferase,
36432	Suppressor of zeste 2(Su(z)2)		GO:0006342~chromatin silencing,GO:0007275~multicellular organism development,GO:0019233~sensory perception of pain,	GO:0005634~nucleus,GO:0005725~intercalary heterochromatin,GO:0035102~PRC1 complex,	GO:0003677~DNA binding,GO:0008270~zinc ion binding,	IPR001841:Zinc finger, RING-type,IPR013083:Zinc finger, RING/FYVE/PHD-type,IPR017907:Zinc finger, RING-type, conserved site,IPR018957:Zinc finger, C3HC4 RING-type,				Complete proteome,Developmental protein,DNA-binding,Metal-binding,Nucleus,Reference proteome,Zinc,Zinc-finger,	chain:Protein suppressor 2 of zeste,compositionally biased region:Asn-rich,compositionally biased region:Gln-rich,compositionally biased region:Ser-rich,sequence conflict,zinc finger region:RING-type,
47396	Target of rapamycin(Tor)		GO:0001558~regulation of cell growth,GO:0001934~positive regulation of protein phosphorylation,GO:0006281~DNA repair,GO:0006468~protein phosphorylation,GO:0006914~autophagy,GO:0006974~cellular response to DNA damage stimulus,GO:0007049~cell cycle,GO:0007411~axon guidance,GO:0007430~terminal branching, open tracheal system,GO:0007520~myoblast fusion,GO:0007525~somatic muscle development,GO:0007584…	GO:0005634~nucleus,GO:0031931~TORC1 complex,GO:0031932~TORC2 complex,	GO:0004672~protein kinase activity,GO:0004674~protein serine/threonine kinase activity,GO:0005524~ATP binding,GO:0016301~kinase activity,GO:0043621~protein self-association,GO:0044877~macromolecular complex binding,	IPR000403:Phosphatidylinositol 3-/4-kinase, catalytic domain,IPR003151:PIK-related kinase, FAT,IPR003152:PIK-related kinase, FATC,IPR009076:Rapamycin-binding domain,IPR011009:Protein kinase-like domain,IPR011989:Armadillo-like helical,IPR011990:Tetratricopeptide-like helical,IPR013026:Tetratricopeptide repeat-containing domain,IPR014009:PIK-related kinase,IPR016024:Armadillo-type fold,IPR018936:P…	dme04150:mTOR signaling pathway,dme04931:Insulin resistance,		SM00146:PI3Kc,SM01343:SM01343,SM01346:SM01346,	ATP-binding,Cell cycle,Complete proteome,Kinase,Nucleotide-binding,Proteomics identification,Reference proteome,Repeat,TPR repeat,Transferase,	chain:Target of rapamycin,compositionally biased region:Poly-Ser,domain:FAT,domain:FATC,domain:PI3K/PI4K,mutagenesis site,repeat:HEAT 1,repeat:HEAT 2,repeat:HEAT 3,repeat:HEAT 4,repeat:HEAT 5,repeat:HEAT 6,repeat:HEAT 7,repeat:HEAT 8,repeat:HEAT 9,repeat:TPR 1,repeat:TPR 2,
34211	Tetraspanin 29Fa(Tsp29Fa)		GO:0007166~cell surface receptor signaling pathway,	GO:0005887~integral component of plasma membrane,GO:0016021~integral component of membrane,		IPR000301:Tetraspanin,IPR008952:Tetraspanin, EC2 domain,IPR018499:Tetraspanin/Peripherin,IPR018503:Tetraspanin, conserved site,	dme04142:Lysosome,	PIRSF002419:tetraspanin,		Complete proteome,Membrane,Reference proteome,Transmembrane,Transmembrane helix,
34212	Tetraspanin 29Fb(Tsp29Fb)		GO:0007166~cell surface receptor signaling pathway,	GO:0005887~integral component of plasma membrane,GO:0016021~integral component of membrane,		IPR000048:IQ motif, EF-hand binding site,IPR000301:Tetraspanin,IPR008952:Tetraspanin, EC2 domain,IPR018499:Tetraspanin/Peripherin,		PIRSF002419:tetraspanin,		Complete proteome,Membrane,Reference proteome,Transmembrane,Transmembrane helix,
35629	Tetraspanin 42Er(Tsp42Er)		GO:0007166~cell surface receptor signaling pathway,	GO:0005887~integral component of plasma membrane,GO:0016021~integral component of membrane,		IPR000301:Tetraspanin,IPR008952:Tetraspanin, EC2 domain,IPR018499:Tetraspanin/Peripherin,				Complete proteome,Membrane,Reference proteome,Transmembrane,Transmembrane helix,
34044	Thioester-containing protein 2(Tep2)		GO:0006909~phagocytosis,GO:0050829~defense response to Gram-negative bacterium,	GO:0005615~extracellular space,	GO:0004866~endopeptidase inhibitor activity,	IPR001599:Alpha-2-macroglobulin,IPR002890:Alpha-2-macroglobulin, N-terminal,IPR008930:Terpenoid cyclases/protein prenyltransferase alpha-alpha toroid,IPR009048:Alpha-macroglobulin, receptor-binding,IPR011625:Alpha-2-macroglobulin, N-terminal 2,IPR011626:A-macroglobulin complement component,IPR019565:Alpha-2-macroglobulin, thiol-ester bond-forming,IPR019742:Alpha-2-macroglobulin, conserved site,			SM01359:SM01359,SM01360:SM01360,SM01361:SM01361,	Coiled coil,Complete proteome,Proteomics identification,Reference proteome,Signal,	signal peptide,
34045	Thioester-containing protein 3(Tep3)		GO:0006909~phagocytosis,GO:0050830~defense response to Gram-positive bacterium,GO:0098542~defense response to other organism,	GO:0005615~extracellular space,	GO:0004866~endopeptidase inhibitor activity,	IPR001599:Alpha-2-macroglobulin,IPR002890:Alpha-2-macroglobulin, N-terminal,IPR008930:Terpenoid cyclases/protein prenyltransferase alpha-alpha toroid,IPR009048:Alpha-macroglobulin, receptor-binding,IPR011625:Alpha-2-macroglobulin, N-terminal 2,IPR011626:A-macroglobulin complement component,IPR019565:Alpha-2-macroglobulin, thiol-ester bond-forming,IPR019742:Alpha-2-macroglobulin, conserved site,			SM01359:SM01359,SM01360:SM01360,SM01361:SM01361,	Complete proteome,Proteomics identification,Reference proteome,Signal,
33896	Tiggrin(Tig)	Cell division and chromosome partitioning,	GO:0006909~phagocytosis,GO:0007411~axon guidance,GO:0031589~cell-substrate adhesion,GO:0033627~cell adhesion mediated by integrin,GO:0033628~regulation of cell adhesion mediated by integrin,GO:0034446~substrate adhesion-dependent cell spreading,GO:0072499~photoreceptor cell axon guidance,	GO:0005578~proteinaceous extracellular matrix,GO:0005604~basement membrane,GO:0031012~extracellular matrix,	GO:0005178~integrin binding,	IPR016084:Haem oxygenase-like, multi-helical,				Coiled coil,Complete proteome,Developmental protein,Direct protein sequencing,Extracellular matrix,Proteomics identification,Reference proteome,Secreted,Signal,
34093	Transglutaminase(Tg)		GO:0018149~peptide cross-linking,GO:0042381~hemolymph coagulation,GO:0045087~innate immune response,		GO:0003810~protein-glutamine gamma-glutamyltransferase activity,GO:0046872~metal ion binding,	IPR001102:Transglutaminase, N-terminal,IPR002931:Transglutaminase-like,IPR008958:Transglutaminase, C-terminal,IPR013783:Immunoglobulin-like fold,IPR014756:Immunoglobulin E-set,IPR023608:Protein-glutamine gamma-glutamyltransferase, eukaryota,		PIRSF000459:protein-glutamine gamma-glutamyltransferase/erythrocyte membrane protein band 4.2,	SM00460:TGc,	Acyltransferase,Complete proteome,Proteomics identification,Reference proteome,Transferase,
31458	Ubiquitin specific protease 16/45(Usp16-45)		GO:0006511~ubiquitin-dependent protein catabolic process,GO:0016579~protein deubiquitination,		GO:0004843~thiol-dependent ubiquitin-specific protease activity,GO:0008270~zinc ion binding,	IPR001394:Peptidase C19, ubiquitin carboxyl-terminal hydrolase 2,IPR001607:Zinc finger, UBP-type,IPR013083:Zinc finger, RING/FYVE/PHD-type,IPR018200:Peptidase C19, ubiquitin carboxyl-terminal hydrolase 2, conserved site,				Coiled coil,Complete proteome,Hydrolase,Metal-binding,Protease,Proteomics identification,Reference proteome,Thiol protease,Ubl conjugation pathway,Zinc,Zinc-finger,
33829	Vitelline membrane 26Aa(Vm26Aa)		GO:0007305~vitelline membrane formation involved in chorion-containing eggshell formation,GO:0048477~oogenesis,	GO:0005576~extracellular region,GO:0060388~vitelline envelope,		IPR013135:Vitelline membrane cysteine-rich domain,				Complete proteome,Reference proteome,Secreted,Signal,	chain:Vitelline membrane protein Vm26Aa,domain:VM,sequence conflict,signal peptide,
34030	Zizimin ortholog (H. sapiens)(Ziz)		GO:0007264~small GTPase mediated signal transduction,GO:0035023~regulation of Rho protein signal transduction,	GO:0005622~intracellular,	GO:0005089~Rho guanyl-nucleotide exchange factor activity,	IPR001849:Pleckstrin homology domain,IPR010703:Dedicator of cytokinesis C-terminal,IPR011993:Pleckstrin homology-like domain,IPR026791:Dedicator of cytokinesis,IPR027007:DHR-1 domain,IPR027357:DHR-2 domain,			SM00233:PH,	Complete proteome,Proteomics identification,Reference proteome,
35188	alpha methyl dopa-resistant(amd)	Amino acid transport and metabolism,	GO:0006520~cellular amino acid metabolic process,GO:0006584~catecholamine metabolic process,GO:0040003~chitin-based cuticle development,		GO:0004058~aromatic-L-amino-acid decarboxylase activity,GO:0016831~carboxy-lyase activity,GO:0019239~deaminase activity,GO:0030170~pyridoxal phosphate binding,GO:0042302~structural constituent of cuticle,	IPR002129:Pyridoxal phosphate-dependent decarboxylase,IPR010977:Aromatic-L-amino-acid decarboxylase,IPR015421:Pyridoxal phosphate-dependent transferase, major region, subdomain 1,IPR015422:Pyridoxal phosphate-dependent transferase, major region, subdomain 2,IPR015424:Pyridoxal phosphate-dependent transferase,IPR021115:Pyridoxal-phosphate binding site,				Catecholamine metabolism,Complete proteome,Cuticle,Decarboxylase,Lyase,Pyridoxal phosphate,Reference proteome,	chain:Alpha-methyldopa hypersensitive protein,modified residue,sequence conflict,
31002	beta amyloid protein precursor-like(Appl)		GO:0007422~peripheral nervous system development,GO:0007611~learning or memory,GO:0007614~short-term memory,GO:0007616~long-term memory,GO:0016319~mushroom body development,GO:0048678~response to axon injury,GO:0048812~neuron projection morphogenesis,GO:0050808~synapse organization,GO:0051602~response to electrical stimulus,GO:1901215~negative regulation of neuron death,	GO:0005576~extracellular region,GO:0005886~plasma membrane,GO:0016021~integral component of membrane,	GO:0005515~protein binding,GO:0008201~heparin binding,GO:0046914~transition metal ion binding,	IPR008154:Amyloidogenic glycoprotein, extracellular,IPR011178:Amyloidogenic glycoprotein, copper-binding,IPR015849:Amyloidogenic glycoprotein, heparin-binding,IPR019543:Beta-amyloid precursor protein C-terminal,IPR019744:Amyloidogenic glycoprotein, extracellular domain conserved site,IPR019745:Amyloidogenic glycoprotein, intracellular domain, conserved site,IPR024329:Amyloidogenic glycoprotein, E…			SM00006:A4_EXTRA,	Amyloid,Coiled coil,Complete proteome,Developmental protein,Differentiation,Disulfide bond,Glycoprotein,Membrane,Neurogenesis,Reference proteome,Signal,Transmembrane,Transmembrane helix,	chain:Beta-amyloid-like protein,glycosylation site:N-linked (GlcNAc...),sequence conflict,short sequence motif:Clathrin-binding,signal peptide,topological domain:Cytoplasmic,topological domain:Extracellular,transmembrane region,
44505	broad(br)		GO:0001752~compound eye photoreceptor fate commitment,GO:0006357~regulation of transcription from RNA polymerase II promoter,GO:0006914~autophagy,GO:0007458~progression of morphogenetic furrow involved in compound eye morphogenesis,GO:0007552~metamorphosis,GO:0007562~eclosion,GO:0008219~cell death,GO:0009608~response to symbiont,GO:0010629~negative regulation of gene expression,GO:0010906~regulat…	GO:0005634~nucleus,	GO:0000977~RNA polymerase II regulatory region sequence-specific DNA binding,GO:0003677~DNA binding,GO:0003700~transcription factor activity, sequence-specific DNA binding,GO:0046872~metal ion binding,	IPR000210:BTB/POZ-like,IPR007087:Zinc finger, C2H2,IPR011333:BTB/POZ fold,IPR015880:Zinc finger, C2H2-like,	dme04320:Dorso-ventral axis formation,		SM00225:BTB,SM00355:ZnF_C2H2,	Alternative splicing,Complete proteome,Developmental protein,DNA-binding,Metal-binding,Nucleus,Reference proteome,Repeat,Zinc,Zinc-finger,	chain:Broad-complex core protein isoform 6,chain:Broad-complex core protein isoforms 1/2/3/4/5,compositionally biased region:Poly-Ala,compositionally biased region:Poly-Asn,compositionally biased region:Poly-Gln,compositionally biased region:Poly-Pro,compositionally biased region:Poly-Thr,domain:BTB,sequence conflict,splice variant,zinc finger region:C2H2-type 1,zinc finger region:C2H2-type 2,
33224	cabut(cbt)	General function prediction only,	GO:0000122~negative regulation of transcription from RNA polymerase II promoter,GO:0007391~dorsal closure,GO:0007423~sensory organ development,GO:0007472~wing disc morphogenesis,GO:0030431~sleep,GO:0035071~salivary gland cell autophagic cell death,GO:0048102~autophagic cell death,GO:0048190~wing disc dorsal/ventral pattern formation,GO:0090098~positive regulation of decapentaplegic signaling path…	GO:0005634~nucleus,	GO:0000981~RNA polymerase II transcription factor activity, sequence-specific DNA binding,GO:0043565~sequence-specific DNA binding,GO:0046872~metal ion binding,	IPR007087:Zinc finger, C2H2,IPR013087:Zinc finger C2H2-type/integrase DNA-binding domain,IPR015880:Zinc finger, C2H2-like,			SM00355:ZnF_C2H2,	Complete proteome,Reference proteome,
43690	chaoptin(chp)	Function unknown,	GO:0007156~homophilic cell adhesion via plasma membrane adhesion molecules,GO:0007601~visual perception,GO:0032528~microvillus organization,GO:0042052~rhabdomere development,GO:0050896~response to stimulus,	GO:0005886~plasma membrane,GO:0016021~integral component of membrane,GO:0016028~rhabdomere,GO:0035996~rhabdomere microvillus,GO:0046658~anchored component of plasma membrane,		IPR000225:Armadillo,IPR001611:Leucine-rich repeat,IPR003591:Leucine-rich repeat, typical subtype,			SM00369:LRR_TYP,	Cell adhesion,Cell membrane,Complete proteome,Direct protein sequencing,Glycoprotein,Leucine-rich repeat,Membrane,Proteomics identification,Reference proteome,Repeat,Sensory transduction,Signal,Transmembrane,Transmembrane helix,Vision,	chain:Chaoptin,glycosylation site:N-linked (GlcNAc...),repeat:LRR 1,repeat:LRR 10,repeat:LRR 11,repeat:LRR 12,repeat:LRR 13,repeat:LRR 14,repeat:LRR 15,repeat:LRR 16,repeat:LRR 17,repeat:LRR 18,repeat:LRR 19,repeat:LRR 2,repeat:LRR 20,repeat:LRR 21,repeat:LRR 22,repeat:LRR 23,repeat:LRR 24,repeat:LRR 25,repeat:LRR 26,repeat:LRR 27,repeat:LRR 28,repeat:LRR 29,repeat:LRR 3,repeat:LRR 30,repeat:LRR …
64877	complexin(cpx)		GO:0006836~neurotransmitter transport,GO:0007274~neuromuscular synaptic transmission,GO:0016079~synaptic vesicle exocytosis,GO:0046928~regulation of neurotransmitter secretion,GO:0050804~modulation of synaptic transmission,GO:0051124~synaptic growth at neuromuscular junction,	GO:0005829~cytosol,GO:0016020~membrane,GO:0031594~neuromuscular junction,GO:0043195~terminal bouton,GO:0048786~presynaptic active zone,	GO:0005326~neurotransmitter transporter activity,GO:0019905~syntaxin binding,	IPR008849:Synaphin,				Alternative splicing,Coiled coil,Complete proteome,Exocytosis,Lipoprotein,Membrane,Methylation,Neurotransmitter transport,Prenylation,Proteomics identification,Reference proteome,Transport,	chain:Complexin,lipid moiety-binding region:S-farnesyl cysteine,modified residue,propeptide:Removed in mature form,sequence conflict,splice variant,
33470	congested-like trachea(colt)		GO:0003382~epithelial cell morphogenesis,GO:0006412~translation,GO:0006839~mitochondrial transport,GO:0006844~acyl carnitine transport,GO:0006909~phagocytosis,GO:0015879~carnitine transport,GO:0035002~liquid clearance, open tracheal system,	GO:0005743~mitochondrial inner membrane,GO:0016021~integral component of membrane,	GO:0003735~structural constituent of ribosome,GO:0005476~carnitine:acyl carnitine antiporter activity,	IPR018108:Mitochondrial substrate/solute carrier,IPR023395:Mitochondrial carrier domain,				Complete proteome,Developmental protein,Membrane,Mitochondrion,Mitochondrion inner membrane,Reference proteome,Repeat,Transmembrane,Transmembrane helix,Transport,	chain:Congested-like trachea protein,repeat:Solcar 1,repeat:Solcar 2,repeat:Solcar 3,sequence conflict,transmembrane region,
38786	cornetto(corn)		GO:0045921~positive regulation of exocytosis,	GO:0005737~cytoplasm,GO:0005938~cell cortex,GO:0043234~protein complex,GO:0045177~apical part of cell,	GO:0005515~protein binding,GO:0008017~microtubule binding,					Coiled coil,Complete proteome,Reference proteome,
36001	dacapo(dap)		GO:0000079~regulation of cyclin-dependent protein serine/threonine kinase activity,GO:0000278~mitotic cell cycle,GO:0007050~cell cycle arrest,GO:0007294~germarium-derived oocyte fate determination,GO:0007419~ventral cord development,GO:0007424~open tracheal system development,GO:0007488~histoblast morphogenesis,GO:0035308~negative regulation of protein dephosphorylation,GO:0045035~sensory organ p…	GO:0005634~nucleus,GO:0005654~nucleoplasm,GO:0005739~mitochondrion,	GO:0004861~cyclin-dependent protein serine/threonine kinase inhibitor activity,	IPR003175:Cyclin-dependent kinase inhibitor,				Complete proteome,Reference proteome,
43789	datilografo(dati)		GO:0008344~adult locomotory behavior,GO:0016319~mushroom body development,GO:0019233~sensory perception of pain,GO:0031175~neuron projection development,GO:0045925~positive regulation of female receptivity,GO:0048699~generation of neurons,		GO:0003676~nucleic acid binding,GO:0046872~metal ion binding,	IPR007087:Zinc finger, C2H2,IPR013087:Zinc finger C2H2-type/integrase DNA-binding domain,IPR015880:Zinc finger, C2H2-like,			SM00355:ZnF_C2H2,	Complete proteome,Reference proteome,
33474	dawdle(daw)		GO:0007179~transforming growth factor beta receptor signaling pathway,GO:0007411~axon guidance,GO:0008340~determination of adult lifespan,GO:0010507~negative regulation of autophagy,GO:0010862~positive regulation of pathway-restricted SMAD protein phosphorylation,GO:0032924~activin receptor signaling pathway,GO:0032927~positive regulation of activin receptor signaling pathway,GO:0040007~growth,GO…	GO:0005615~extracellular space,	GO:0005125~cytokine activity,GO:0005160~transforming growth factor beta receptor binding,GO:0008083~growth factor activity,	IPR001111:Transforming growth factor-beta, N-terminal,IPR001839:Transforming growth factor-beta, C-terminal,IPR015615:Transforming growth factor-beta-related,IPR017948:Transforming growth factor beta, conserved site,			SM00204:TGFB,	Complete proteome,Disulfide bond,Growth factor,Reference proteome,Secreted,
38101	defective proboscis extension response 20(dpr20)		GO:0007606~sensory perception of chemical stimulus,GO:0050808~synapse organization,	GO:0005887~integral component of plasma membrane,		IPR003598:Immunoglobulin subtype 2,IPR003599:Immunoglobulin subtype,IPR007110:Immunoglobulin-like domain,IPR013106:Immunoglobulin V-set,IPR013151:Immunoglobulin,IPR013783:Immunoglobulin-like fold,			SM00406:IGv,SM00408:IGc2,SM00409:IG,	Complete proteome,Immunoglobulin domain,Reference proteome,
32436	doppelganger von brummer(dob)		GO:0019433~triglyceride catabolic process,GO:0055088~lipid homeostasis,	GO:0005737~cytoplasm,GO:0005811~lipid particle,GO:0016020~membrane,	GO:0004806~triglyceride lipase activity,	IPR002641:Patatin/Phospholipase A2-related,IPR016035:Acyl transferase/acyl hydrolase/lysophospholipase,				Complete proteome,Hydrolase,Reference proteome,
35047	dorsal(dl)		GO:0000122~negative regulation of transcription from RNA polymerase II promoter,GO:0000381~regulation of alternative mRNA splicing, via spliceosome,GO:0001715~ectodermal cell fate specification,GO:0006355~regulation of transcription, DNA-templated,GO:0006357~regulation of transcription from RNA polymerase II promoter,GO:0006952~defense response,GO:0006955~immune response,GO:0006964~positive regul…	GO:0005634~nucleus,GO:0005737~cytoplasm,GO:0005829~cytosol,GO:0031594~neuromuscular junction,GO:0033256~I-kappaB/NF-kappaB complex,GO:0071212~subsynaptic reticulum,	GO:0000977~RNA polymerase II regulatory region sequence-specific DNA binding,GO:0001077~transcriptional activator activity, RNA polymerase II core promoter proximal region sequence-specific binding,GO:0003677~DNA binding,GO:0003682~chromatin binding,GO:0003700~transcription factor activity, sequence-specific DNA binding,GO:0003705~transcription factor activity, RNA polymerase II distal enhancer s…	IPR000451:NF-kappa-B/Rel/Dorsal,IPR002909:Cell surface receptor IPT/TIG,IPR008967:p53-like transcription factor, DNA-binding,IPR011363:Dorsal protein,IPR011539:Rel homology domain,IPR013783:Immunoglobulin-like fold,IPR014756:Immunoglobulin E-set,		PIRSF001716:dorsal protein,	SM00429:IPT,	Activator,Alternative splicing,Complete proteome,Cytoplasm,Developmental protein,DNA-binding,Nucleus,Phosphoprotein,Proteomics identification,Reference proteome,Transcription,Transcription regulation,	chain:Embryonic polarity protein dorsal,compositionally biased region:Gln-rich,compositionally biased region:Pro-rich,domain:RHD,modified residue,sequence conflict,short sequence motif:Nuclear localization signal,splice variant,
46234	fumble(fbl)		GO:0006979~response to oxidative stress,GO:0007059~chromosome segregation,GO:0007067~mitotic nuclear division,GO:0007126~meiotic nuclear division,GO:0007283~spermatogenesis,GO:0007476~imaginal disc-derived wing morphogenesis,GO:0015937~coenzyme A biosynthetic process,GO:0019233~sensory perception of pain,GO:0032465~regulation of cytokinesis,GO:0040011~locomotion,GO:0045475~locomotor rhythm,GO:004…	GO:0005737~cytoplasm,GO:0005819~spindle,GO:0005886~plasma membrane,	GO:0004594~pantothenate kinase activity,GO:0005524~ATP binding,	IPR004567:Type II pantothenate kinase,	dme00770:Pantothenate and CoA biosynthesis,dme01100:Metabolic pathways,			Complete proteome,Proteomics identification,Reference proteome,Transferase,
44095	fusilli(fus)		GO:0006397~mRNA processing,GO:0007173~epidermal growth factor receptor signaling pathway,GO:0008380~RNA splicing,GO:0043484~regulation of RNA splicing,	GO:0005634~nucleus,	GO:0000166~nucleotide binding,GO:0003676~nucleic acid binding,GO:0003729~mRNA binding,	IPR000504:RNA recognition motif domain,IPR012337:Ribonuclease H-like domain,IPR012677:Nucleotide-binding, alpha-beta plait,			SM00360:RRM,	Alternative splicing,Complete proteome,mRNA processing,mRNA splicing,Nucleus,Reference proteome,Repeat,RNA-binding,	chain:RNA-binding protein fusilli,compositionally biased region:Ala-rich,compositionally biased region:Gln-rich,domain:RRM 1,domain:RRM 2,splice variant,
42571	gliolectin(glec)		GO:0007155~cell adhesion,GO:0007157~heterophilic cell-cell adhesion via plasma membrane cell adhesion molecules,GO:0007399~nervous system development,	GO:0005654~nucleoplasm,GO:0005886~plasma membrane,GO:0016021~integral component of membrane,	GO:0030246~carbohydrate binding,					Alternative splicing,Complete proteome,Glycoprotein,Lectin,Membrane,Reference proteome,Signal-anchor,Transmembrane,Transmembrane helix,	chain:Gliolectin,compositionally biased region:Asn-rich,glycosylation site:N-linked (GlcNAc...),sequence conflict,splice variant,topological domain:Cytoplasmic,topological domain:Extracellular,transmembrane region,
37038	grainy head(grh)		GO:0003382~epithelial cell morphogenesis,GO:0006351~transcription, DNA-templated,GO:0007009~plasma membrane organization,GO:0007399~nervous system development,GO:0007402~ganglion mother cell fate determination,GO:0007419~ventral cord development,GO:0007424~open tracheal system development,GO:0007426~tracheal outgrowth, open tracheal system,GO:0007428~primary branching, open tracheal system,GO:000…	GO:0005634~nucleus,	GO:0003677~DNA binding,GO:0003700~transcription factor activity, sequence-specific DNA binding,GO:0042803~protein homodimerization activity,GO:0043565~sequence-specific DNA binding,	IPR007604:CP2 transcription factor,				Alternative splicing,Coiled coil,Complete proteome,DNA-binding,Nucleus,Reference proteome,Transcription,Transcription regulation,	chain:Protein grainyhead,compositionally biased region:Gln-rich,compositionally biased region:His-rich,compositionally biased region:Poly-Ala,compositionally biased region:Poly-Gly,sequence conflict,splice variant,
43604	headcase(hdc)		GO:0002165~instar larval or pupal development,GO:0007430~terminal branching, open tracheal system,GO:0007476~imaginal disc-derived wing morphogenesis,GO:0016246~RNA interference,GO:0022008~neurogenesis,GO:0035071~salivary gland cell autophagic cell death,GO:0035147~branch fusion, open tracheal system,GO:0035155~negative regulation of terminal cell fate specification, open tracheal system,GO:00486…	GO:0005737~cytoplasm,GO:0030424~axon,GO:0030425~dendrite,GO:0048471~perinuclear region of cytoplasm,		IPR026066:Headcase protein,				Complete proteome,Cytoplasm,Developmental protein,Reference proteome,	chain:Headcase protein,chain:Headcase short protein,compositionally biased region:Gln-rich,compositionally biased region:Poly-Asn,compositionally biased region:Poly-Gln,compositionally biased region:Poly-Gly,compositionally biased region:Poly-Ser,sequence conflict,
42207	hemingway(hmw)		GO:0007283~spermatogenesis,GO:0007288~sperm axoneme assembly,GO:0007291~sperm individualization,GO:0044458~motile cilium assembly,GO:0050910~detection of mechanical stimulus involved in sensory perception of sound,	GO:0005737~cytoplasm,GO:0005929~cilium,GO:0043204~perikaryon,						Cell projection,Cilium biogenesis/degradation,Complete proteome,Cytoplasm,Differentiation,Reference proteome,Spermatogenesis,
43997	jitterbug(jbug)		GO:0009612~response to mechanical stimulus,GO:0048104~establishment of body hair or bristle planar orientation,GO:0072499~photoreceptor cell axon guidance,		GO:0003779~actin binding,	IPR001298:Filamin/ABP280 repeat,IPR001589:Actinin-type, actin-binding, conserved site,IPR001715:Calponin homology domain,IPR013783:Immunoglobulin-like fold,IPR014756:Immunoglobulin E-set,IPR017868:Filamin/ABP280 repeat-like,			SM00033:CH,SM00557:IG_FLMN,	Actin-binding,Complete proteome,Proteomics identification,Reference proteome,Repeat,
34274	junctophilin(jp)	Function unknown,		GO:0016021~integral component of membrane,GO:0030314~junctional membrane complex,		IPR003409:MORN motif,			SM00698:MORN,	Coiled coil,Complete proteome,Membrane,Reference proteome,Repeat,Transmembrane,Transmembrane helix,
33837	little imaginal discs(lid)		GO:0006325~chromatin organization,GO:0006351~transcription, DNA-templated,GO:0007526~larval somatic muscle development,GO:0016577~histone demethylation,GO:0030717~karyosome formation,GO:0032922~circadian regulation of gene expression,GO:0034720~histone H3-K4 demethylation,GO:0034721~histone H3-K4 demethylation, trimethyl-H3-K4-specific,GO:0036098~male germ-line stem cell population maintenance,GO…	GO:0005634~nucleus,GO:0070822~Sin3-type complex,	GO:0003677~DNA binding,GO:0004402~histone acetyltransferase activity,GO:0005515~protein binding,GO:0008270~zinc ion binding,GO:0016706~oxidoreductase activity, acting on paired donors, with incorporation or reduction of molecular oxygen, 2-oxoglutarate as one donor, and incorporation of one atom each of oxygen into both donors,GO:0032453~histone demethylase activity (H3-K4 specific),GO:0034647~hi…	IPR001606:ARID/BRIGHT DNA-binding domain,IPR001965:Zinc finger, PHD-type,IPR003347:JmjC domain,IPR003349:Transcription factor jumonji, JmjN,IPR004198:Zinc finger, C5HC2-type,IPR011011:Zinc finger, FYVE/PHD-type,IPR013083:Zinc finger, RING/FYVE/PHD-type,IPR013637:Lysine-specific demethylase-like domain,IPR019786:Zinc finger, PHD-type, conserved site,IPR019787:Zinc finger, PHD-finger,			SM00249:PHD,SM00501:BRIGHT,SM00545:JmjN,SM00558:JmjC,	3D-structure,Acyltransferase,Biological rhythms,Chromatin regulator,Coiled coil,Complete proteome,Developmental protein,Dioxygenase,Iron,Metal-binding,Nucleus,Oxidoreductase,Phosphoprotein,Reference proteome,Repeat,Transcription,Transcription regulation,Transferase,Zinc,Zinc-finger,	chain:Lysine-specific demethylase lid,compositionally biased region:Asn-rich,compositionally biased region:Poly-Asp,compositionally biased region:Poly-Gln,compositionally biased region:Poly-Gly,domain:ARID,domain:JmjC,domain:JmjN,modified residue,mutagenesis site,zinc finger region:PHD-type 1,zinc finger region:PHD-type 2,zinc finger region:PHD-type 3,
38259	mauve(mv)		GO:0006909~phagocytosis,GO:0045771~negative regulation of autophagosome size,			IPR000409:BEACH domain,IPR001680:WD40 repeat,IPR011993:Pleckstrin homology-like domain,IPR015943:WD40/YVTN repeat-like-containing domain,IPR017986:WD40-repeat-containing domain,IPR019775:WD40 repeat, conserved site,			SM00320:WD40,SM01026:SM01026,	Complete proteome,Reference proteome,
39750	mind bomb 1(mib1)		GO:0000209~protein polyubiquitination,GO:0001745~compound eye morphogenesis,GO:0006897~endocytosis,GO:0007219~Notch signaling pathway,GO:0007423~sensory organ development,GO:0007476~imaginal disc-derived wing morphogenesis,GO:0007480~imaginal disc-derived leg morphogenesis,GO:0008104~protein localization,GO:0008593~regulation of Notch signaling pathway,GO:0016567~protein ubiquitination,GO:0045747…	GO:0005737~cytoplasm,GO:0005829~cytosol,GO:0045179~apical cortex,	GO:0004842~ubiquitin-protein transferase activity,GO:0005515~protein binding,GO:0008270~zinc ion binding,GO:0016874~ligase activity,GO:0061630~ubiquitin protein ligase activity,	IPR000433:Zinc finger, ZZ-type,IPR001841:Zinc finger, RING-type,IPR002110:Ankyrin repeat,IPR010606:Mib-herc2,IPR013083:Zinc finger, RING/FYVE/PHD-type,IPR020683:Ankyrin repeat-containing domain,			SM00184:RING,SM00248:ANK,SM00291:ZnF_ZZ,	ANK repeat,Coiled coil,Complete proteome,Cytoplasm,Ligase,Metal-binding,Notch signaling pathway,Reference proteome,Repeat,Ubl conjugation pathway,Zinc,Zinc-finger,	chain:E3 ubiquitin-protein ligase mind-bomb,domain:MIB/HERC2 1,domain:MIB/HERC2 2,mutagenesis site,repeat:ANK 1,repeat:ANK 2,repeat:ANK 3,repeat:ANK 4,repeat:ANK 5,repeat:ANK 6,repeat:ANK 7,repeat:ANK 8,zinc finger region:RING-type 1,zinc finger region:RING-type 2,zinc finger region:RING-type 3,zinc finger region:ZZ-type,
32771	minibrain(mnb)		GO:0006468~protein phosphorylation,GO:0007399~nervous system development,GO:0007611~learning or memory,GO:0007623~circadian rhythm,GO:0007632~visual behavior,GO:0008355~olfactory learning,GO:0030154~cell differentiation,GO:0035332~positive regulation of hippo signaling,GO:0045666~positive regulation of neuron differentiation,GO:0045786~negative regulation of cell cycle,GO:0045887~positive regulat…	GO:0005634~nucleus,GO:0043195~terminal bouton,	GO:0004672~protein kinase activity,GO:0004674~protein serine/threonine kinase activity,GO:0004712~protein serine/threonine/tyrosine kinase activity,GO:0005524~ATP binding,	IPR000719:Protein kinase, catalytic domain,IPR008271:Serine/threonine-protein kinase, active site,IPR011009:Protein kinase-like domain,IPR017441:Protein kinase, ATP binding site,			SM00220:S_TKc,	Alternative splicing,ATP-binding,Complete proteome,Developmental protein,Differentiation,Kinase,Neurogenesis,Nucleotide-binding,Nucleus,Polymorphism,Proteomics identification,Reference proteome,Serine/threonine-protein kinase,Transferase,	active site:Proton acceptor,binding site:ATP,chain:Serine/threonine-protein kinase minibrain,compositionally biased region:Ala-rich,compositionally biased region:Asn-rich,compositionally biased region:Gly-rich,compositionally biased region:Ser-rich,domain:Protein kinase,nucleotide phosphate-binding region:ATP,sequence conflict,sequence variant,short sequence motif:Bipartite nuclear localization s…
39625	minidiscs(mnd)		GO:0003333~amino acid transmembrane transport,GO:0006865~amino acid transport,GO:0030431~sleep,GO:0060356~leucine import,	GO:0005887~integral component of plasma membrane,GO:0016020~membrane,	GO:0015171~amino acid transmembrane transporter activity,GO:0015179~L-amino acid transmembrane transporter activity,GO:0015297~antiporter activity,	IPR002293:Amino acid/polyamine transporter I,		PIRSF006060:amino acid transporter,		Complete proteome,Membrane,Reference proteome,Transmembrane,Transmembrane helix,
49228	modifier of mdg4(mod(mdg4))		GO:0001672~regulation of chromatin assembly or disassembly,GO:0006351~transcription, DNA-templated,GO:0006357~regulation of transcription from RNA polymerase II promoter,GO:0006915~apoptotic process,GO:0007060~male meiosis chromosome segregation,GO:0007141~male meiosis I,GO:0008354~germ cell migration,GO:0010032~meiotic chromosome condensation,GO:0016569~covalent chromatin modification,GO:0048477…	GO:0000785~chromatin,GO:0000794~condensed nuclear chromosome,GO:0005634~nucleus,GO:0005700~polytene chromosome,GO:0005704~polytene chromosome band,GO:0005730~nucleolus,GO:0005886~plasma membrane,	GO:0003677~DNA binding,GO:0003682~chromatin binding,GO:0005515~protein binding,GO:0008195~phosphatidate phosphatase activity,GO:0031208~POZ domain binding,GO:0042803~protein homodimerization activity,GO:0046872~metal ion binding,	IPR000210:BTB/POZ-like,IPR007588:Zinc finger, FLYWCH-type,IPR011333:BTB/POZ fold,			SM00225:BTB,	Alternative splicing,Apoptosis,Chromatin regulator,Chromosome,Complete proteome,Hydrolase,Metal-binding,Nucleus,Phosphoprotein,Proteomics identification,Reference proteome,Transcription,Transcription regulation,Zinc,Zinc-finger,	chain:Modifier of mdg4,compositionally biased region:Gln-rich,domain:BTB,modified residue,mutagenesis site,region of interest:Interaction with Chi,region of interest:Interaction with su(Hw),region of interest:Self-association,sequence conflict,splice variant,zinc finger region:FLYWCH-type,
38257	mutator 2(mu2)		GO:0006302~double-strand break repair,GO:0090052~regulation of chromatin silencing at centromere,GO:1902275~regulation of chromatin organization,	GO:0000775~chromosome, centromeric region,GO:0005719~nuclear euchromatin,	GO:0001105~RNA polymerase II transcription coactivator activity,GO:0042802~identical protein binding,	IPR001357:BRCT domain,				3D-structure,Complete proteome,Proteomics identification,Reference proteome,
42297	nanos(nos)		GO:0001709~cell fate determination,GO:0006378~mRNA polyadenylation,GO:0007280~pole cell migration,GO:0007281~germ cell development,GO:0007283~spermatogenesis,GO:0007314~oocyte anterior/posterior axis specification,GO:0008354~germ cell migration,GO:0008595~anterior/posterior axis specification, embryo,GO:0016321~female meiosis chromosome segregation,GO:0017148~negative regulation of translation,GO…	GO:0031594~neuromuscular junction,GO:0045495~pole plasm,GO:0098975~postsynapse of neuromuscular junction,	GO:0003723~RNA binding,GO:0005515~protein binding,GO:0008270~zinc ion binding,	IPR008705:Nanos/Xcat2,IPR024161:Zinc finger, nanos-type,				3D-structure,Complete proteome,Developmental protein,Differentiation,Metal-binding,Oogenesis,Reference proteome,RNA-binding,Spermatogenesis,Translation regulation,Zinc,Zinc-finger,	chain:Protein nanos,compositionally biased region:Poly-Asn,compositionally biased region:Poly-Gln,mutagenesis site,zinc finger region:Nanos-type,
33271	neither inactivation nor afterpotential A(ninaA)		GO:0000413~protein peptidyl-prolyl isomerization,GO:0006457~protein folding,GO:0006458~'de novo' protein folding,GO:0006491~N-glycan processing,GO:0006517~protein deglycosylation,GO:0006810~transport,GO:0007601~visual perception,GO:0007602~phototransduction,GO:0007603~phototransduction, visible light,GO:0016063~rhodopsin biosynthetic process,GO:0045494~photoreceptor cell maintenance,GO:0046154~rh…	GO:0005788~endoplasmic reticulum lumen,GO:0016021~integral component of membrane,GO:0016023~cytoplasmic, membrane-bounded vesicle,GO:0016028~rhabdomere,GO:0031410~cytoplasmic vesicle,GO:0031965~nuclear membrane,	GO:0003755~peptidyl-prolyl cis-trans isomerase activity,GO:0016018~cyclosporin A binding,	IPR002130:Cyclophilin-like peptidyl-prolyl cis-trans isomerase domain,IPR020892:Cyclophilin-type peptidyl-prolyl cis-trans isomerase, conserved site,				Complete proteome,Glycoprotein,Isomerase,Membrane,Reference proteome,Rotamase,Sensory transduction,Signal,Transmembrane,Transmembrane helix,Vision,	chain:Peptidyl-prolyl cis-trans isomerase, rhodopsin-specific isozyme,domain:PPIase cyclophilin-type,glycosylation site:N-linked (GlcNAc...),signal peptide,transmembrane region,
42367	neither inactivation nor afterpotential E(ninaE)		GO:0007186~G-protein coupled receptor signaling pathway,GO:0007601~visual perception,GO:0007602~phototransduction,GO:0008344~adult locomotory behavior,GO:0008594~photoreceptor cell morphogenesis,GO:0009584~detection of visible light,GO:0009589~detection of UV,GO:0009642~response to light intensity,GO:0018298~protein-chromophore linkage,GO:0019233~sensory perception of pain,GO:0030265~phospholipas…	GO:0005767~secondary lysosome,GO:0005771~multivesicular body,GO:0005791~rough endoplasmic reticulum,GO:0005886~plasma membrane,GO:0005887~integral component of plasma membrane,GO:0016021~integral component of membrane,GO:0016023~cytoplasmic, membrane-bounded vesicle,GO:0016027~inaD signaling complex,GO:0016028~rhabdomere,GO:0016029~subrhabdomeral cisterna,GO:0031410~cytoplasmic vesicle,GO:0097038…	GO:0005515~protein binding,GO:0008020~G-protein coupled photoreceptor activity,	IPR000276:G protein-coupled receptor, rhodopsin-like,IPR001735:Opsin RH1/RH2,IPR001760:Opsin,IPR017452:GPCR, rhodopsin-like, 7TM,IPR027430:Visual pigments (opsins) retinal binding site,	dme04745:Phototransduction - fly,			Chromophore,Complete proteome,Disulfide bond,G-protein coupled receptor,Glycoprotein,Membrane,Phosphoprotein,Photoreceptor protein,Receptor,Reference proteome,Retinal protein,Sensory transduction,Transducer,Transmembrane,Transmembrane helix,Vision,	chain:Opsin Rh1,disulfide bond,glycosylation site:N-linked (GlcNAc...),modified residue,topological domain:Cytoplasmic,topological domain:Extracellular,transmembrane region,
33953	nervana 2(nrv2)		GO:0006812~cation transport,GO:0006813~potassium ion transport,GO:0006814~sodium ion transport,GO:0007424~open tracheal system development,GO:0007605~sensory perception of sound,GO:0010248~establishment or maintenance of transmembrane electrochemical gradient,GO:0019991~septate junction assembly,GO:0035151~regulation of tube size, open tracheal system,GO:0035158~regulation of tube diameter, open …	GO:0005886~plasma membrane,GO:0005890~sodium:potassium-exchanging ATPase complex,GO:0005918~septate junction,GO:0030424~axon,	GO:0005391~sodium:potassium-exchanging ATPase activity,GO:0008324~cation transmembrane transporter activity,	IPR000402:Sodium/potassium-transporting ATPase subunit beta,				Alternative splicing,Complete proteome,Disulfide bond,Glycoprotein,Hydrolase,Ion transport,Membrane,Potassium,Potassium transport,Proteomics identification,Reference proteome,Signal-anchor,Sodium,Sodium transport,Sodium/potassium transport,Transmembrane,Transmembrane helix,Transport,	chain:Sodium/potassium-transporting ATPase subunit beta-2,disulfide bond,glycosylation site:N-linked (GlcNAc...),sequence conflict,splice variant,topological domain:Cytoplasmic,topological domain:Extracellular,transmembrane region,
35408	nervana 3(nrv3)		GO:0006813~potassium ion transport,GO:0006814~sodium ion transport,GO:0007605~sensory perception of sound,GO:0010996~response to auditory stimulus,GO:0019233~sensory perception of pain,	GO:0005886~plasma membrane,GO:0005890~sodium:potassium-exchanging ATPase complex,	GO:0005391~sodium:potassium-exchanging ATPase activity,	IPR000402:Sodium/potassium-transporting ATPase subunit beta,				Complete proteome,Hydrolase,Membrane,Proteomics identification,Reference proteome,Transmembrane,Transmembrane helix,
44258	pasilla(ps)		GO:0000398~mRNA splicing, via spliceosome,	GO:0005634~nucleus,GO:0005829~cytosol,	GO:0003729~mRNA binding,	IPR004087:K Homology domain,IPR004088:K Homology domain, type 1,			SM00322:KH,	Complete proteome,Proteomics identification,Reference proteome,
43487	pickpocket 30(ppk30)		GO:0006814~sodium ion transport,GO:2000331~regulation of terminal button organization,	GO:0016021~integral component of membrane,	GO:0005272~sodium channel activity,	IPR001873:Na+ channel, amiloride-sensitive,				Complete proteome,Ion channel,Ion transport,Membrane,Reference proteome,Sodium,Sodium channel,Sodium transport,Transmembrane,Transmembrane helix,Transport,
40104	pipe(pip)		GO:0007313~maternal specification of dorsal/ventral axis, oocyte, soma encoded,GO:0008063~Toll signaling pathway,GO:0009880~embryonic pattern specification,GO:0009950~dorsal/ventral axis specification,GO:0016485~protein processing,GO:0040014~regulation of multicellular organism growth,GO:0048477~oogenesis,	GO:0005634~nucleus,GO:0005694~chromosome,GO:0005794~Golgi apparatus,GO:0016021~integral component of membrane,GO:0030173~integral component of Golgi membrane,	GO:0004394~heparan sulfate 2-O-sulfotransferase activity,GO:0005515~protein binding,GO:0008146~sulfotransferase activity,GO:0034481~chondroitin sulfotransferase activity,GO:0034483~heparan sulfate sulfotransferase activity,	IPR005331:Sulfotransferase,IPR007734:Heparan sulphate 2-O-sulfotransferase,IPR027417:P-loop containing nucleoside triphosphate hydrolase,				Alternative splicing,Complete proteome,Developmental protein,Glycoprotein,Golgi apparatus,Membrane,Reference proteome,Signal-anchor,Transferase,Transmembrane,Transmembrane helix,	chain:Heparan sulfate 2-O-sulfotransferase pipe,compositionally biased region:His-rich,glycosylation site:N-linked (GlcNAc...),splice variant,topological domain:Cytoplasmic,topological domain:Lumenal,transmembrane region,
40704	pollux(plx)		GO:0006886~intracellular protein transport,GO:0031338~regulation of vesicle fusion,GO:0033627~cell adhesion mediated by integrin,GO:0043087~regulation of GTPase activity,GO:0090630~activation of GTPase activity,	GO:0005794~Golgi apparatus,GO:0009986~cell surface,	GO:0005096~GTPase activator activity,GO:0005178~integrin binding,GO:0017137~Rab GTPase binding,	IPR000195:Rab-GTPase-TBC domain,IPR006020:Phosphotyrosine interaction domain,IPR011993:Pleckstrin homology-like domain,IPR021785:Protein of unknown function DUF3350,	dme04931:Insulin resistance,		SM00164:TBC,SM00462:PTB,	Coiled coil,Complete proteome,Reference proteome,
38346	polypeptide GalNAc transferase 6(pgant6)		GO:0006486~protein glycosylation,GO:0009312~oligosaccharide biosynthetic process,	GO:0000139~Golgi membrane,GO:0005783~endoplasmic reticulum,GO:0005795~Golgi stack,GO:0016021~integral component of membrane,	GO:0004653~polypeptide N-acetylgalactosaminyltransferase activity,GO:0016757~transferase activity, transferring glycosyl groups,GO:0030246~carbohydrate binding,GO:0046872~metal ion binding,	IPR000772:Ricin B lectin domain,IPR001173:Glycosyl transferase, family 2,	dme00512:Mucin type O-Glycan biosynthesis,dme01100:Metabolic pathways,		SM00458:RICIN,	Complete proteome,Disulfide bond,Glycoprotein,Glycosyltransferase,Golgi apparatus,Lectin,Manganese,Membrane,Metal-binding,Reference proteome,Signal-anchor,Transferase,Transmembrane,Transmembrane helix,	chain:N-acetylgalactosaminyltransferase 6,disulfide bond,domain:Ricin B-type lectin,glycosylation site:N-linked (GlcNAc...),region of interest:Catalytic subdomain A,region of interest:Catalytic subdomain B,sequence conflict,topological domain:Cytoplasmic,topological domain:Lumenal,transmembrane region,
41363	prospero(pros)		GO:0000122~negative regulation of transcription from RNA polymerase II promoter,GO:0001708~cell fate specification,GO:0001754~eye photoreceptor cell differentiation,GO:0006351~transcription, DNA-templated,GO:0006355~regulation of transcription, DNA-templated,GO:0006909~phagocytosis,GO:0007399~nervous system development,GO:0007400~neuroblast fate determination,GO:0007402~ganglion mother cell fate …	GO:0005634~nucleus,GO:0005875~microtubule associated complex,GO:0005886~plasma membrane,GO:0005938~cell cortex,GO:0045178~basal part of cell,GO:0045179~apical cortex,GO:0045180~basal cortex,	GO:0001078~transcriptional repressor activity, RNA polymerase II core promoter proximal region sequence-specific binding,GO:0003677~DNA binding,GO:0003700~transcription factor activity, sequence-specific DNA binding,	IPR009057:Homeodomain-like,IPR023082:Homeo-prospero domain,				3D-structure,Alternative splicing,Coiled coil,Complete proteome,Developmental protein,DNA-binding,Homeobox,Nucleus,Phosphoprotein,Reference proteome,Signal,Transcription,Transcription regulation,	chain:Homeobox protein prospero,compositionally biased region:Asn-rich,compositionally biased region:Gln-rich,compositionally biased region:His-rich,compositionally biased region:Ser-rich,DNA-binding region:Prospero-type homeobox,helix,modified residue,region of interest:Prospero-like,sequence conflict,short sequence motif:Nuclear localization signal,splice variant,turn,
41279	pugilist(pug)	Coenzyme metabolism,	GO:0000105~histidine biosynthetic process,GO:0006164~purine nucleotide biosynthetic process,GO:0006730~one-carbon metabolic process,GO:0008652~cellular amino acid biosynthetic process,GO:0009086~methionine biosynthetic process,GO:0009396~folic acid-containing compound biosynthetic process,GO:0035999~tetrahydrofolate interconversion,GO:0055114~oxidation-reduction process,	GO:0005737~cytoplasm,GO:0005811~lipid particle,GO:0005829~cytosol,	GO:0004329~formate-tetrahydrofolate ligase activity,GO:0004477~methenyltetrahydrofolate cyclohydrolase activity,GO:0004488~methylenetetrahydrofolate dehydrogenase (NADP+) activity,GO:0005524~ATP binding,	IPR000559:Formate-tetrahydrofolate ligase, FTHFS,IPR000672:Tetrahydrofolate dehydrogenase/cyclohydrolase,IPR016040:NAD(P)-binding domain,IPR020628:Formate-tetrahydrofolate ligase, FTHFS, conserved site,IPR020630:Tetrahydrofolate dehydrogenase/cyclohydrolase, catalytic domain,IPR020631:Tetrahydrofolate dehydrogenase/cyclohydrolase, NAD(P)-binding domain,IPR020867:Tetrahydrofolate dehydrogenase/cyc…	dme00670:One carbon pool by folate,dme01100:Metabolic pathways,			Alternative splicing,Amino-acid biosynthesis,ATP-binding,Complete proteome,Cytoplasm,Histidine biosynthesis,Hydrolase,Ligase,Methionine biosynthesis,Multifunctional enzyme,NADP,Nucleotide-binding,One-carbon metabolism,Oxidoreductase,Proteomics identification,Purine biosynthesis,Reference proteome,	binding site:NADP,chain:C-1-tetrahydrofolate synthase, cytoplasmic,nucleotide phosphate-binding region:ATP,nucleotide phosphate-binding region:NADP,region of interest:Formyltetrahydrofolate synthetase,region of interest:Methylenetetrahydrofolate dehydrogenase and cyclohydrolase,region of interest:Substrate binding,sequence conflict,splice variant,
36255	pyramus(pyr)		GO:0007498~mesoderm development,GO:0007509~mesoderm migration involved in gastrulation,GO:0007523~larval visceral muscle development,GO:0007526~larval somatic muscle development,GO:0008347~glial cell migration,GO:0008543~fibroblast growth factor receptor signaling pathway,GO:0010002~cardioblast differentiation,GO:0021782~glial cell development,GO:0051451~myoblast migration,GO:0060252~positive reg…		GO:0005104~fibroblast growth factor receptor binding,GO:0008083~growth factor activity,	IPR002209:Heparin-binding growth factor/Fibroblast growth factor,IPR008996:Cytokine, IL-1-like,				Coiled coil,Complete proteome,Reference proteome,
35077	reduced ocelli(rdo)		GO:0008056~ocellus development,	GO:0016021~integral component of membrane,		IPR001611:Leucine-rich repeat,IPR003591:Leucine-rich repeat, typical subtype,			SM00369:LRR_TYP,	Complete proteome,Membrane,Reference proteome,Signal,Transmembrane,Transmembrane helix,
40627	retinophilin(rtp)	Function unknown,		GO:0016028~rhabdomere,		IPR003409:MORN motif,			SM00698:MORN,	Complete proteome,Proteomics identification,Reference proteome,Repeat,
41491	seven up(svp)		GO:0001752~compound eye photoreceptor fate commitment,GO:0006351~transcription, DNA-templated,GO:0006355~regulation of transcription, DNA-templated,GO:0007270~neuron-neuron synaptic transmission,GO:0007419~ventral cord development,GO:0007462~R1/R6 cell fate commitment,GO:0007464~R3/R4 cell fate commitment,GO:0007465~R7 cell fate commitment,GO:0007503~fat body development,GO:0007507~heart developm…	GO:0005634~nucleus,GO:0005737~cytoplasm,	GO:0001078~transcriptional repressor activity, RNA polymerase II core promoter proximal region sequence-specific binding,GO:0003707~steroid hormone receptor activity,GO:0004872~receptor activity,GO:0004879~RNA polymerase II transcription factor activity, ligand-activated sequence-specific DNA binding,GO:0005515~protein binding,GO:0008270~zinc ion binding,GO:0042803~protein homodimerization activi…	IPR000536:Nuclear hormone receptor, ligand-binding, core,IPR001628:Zinc finger, nuclear hormone receptor-type,IPR001723:Steroid hormone receptor,IPR003068:Transcription factor COUP,IPR013088:Zinc finger, NHR/GATA-type,			SM00399:ZnF_C4,SM00430:HOLI,	Alternative splicing,Complete proteome,DNA-binding,Metal-binding,Nucleus,Receptor,Reference proteome,Sensory transduction,Transcription,Transcription regulation,Vision,Zinc,Zinc-finger,	chain:Steroid receptor seven-up, isoform A,chain:Steroid receptor seven-up, isoforms B/C,compositionally biased region:Ser-rich,DNA-binding region:Nuclear receptor,sequence conflict,splice variant,zinc finger region:NR C4-type,
31248	shaggy(sgg)		GO:0003382~epithelial cell morphogenesis,GO:0006468~protein phosphorylation,GO:0007051~spindle organization,GO:0007143~female meiotic division,GO:0007219~Notch signaling pathway,GO:0007367~segment polarity determination,GO:0007423~sensory organ development,GO:0007507~heart development,GO:0007622~rhythmic behavior,GO:0007623~circadian rhythm,GO:0008355~olfactory learning,GO:0008407~chaeta morphoge…	GO:0005634~nucleus,GO:0005654~nucleoplasm,GO:0005737~cytoplasm,GO:0005813~centrosome,GO:0005829~cytosol,GO:0005938~cell cortex,GO:0030054~cell junction,GO:0030424~axon,GO:0031594~neuromuscular junction,GO:0035324~female germline ring canal,GO:0045169~fusome,GO:0072686~mitotic spindle,	GO:0004672~protein kinase activity,GO:0004674~protein serine/threonine kinase activity,GO:0005515~protein binding,GO:0005524~ATP binding,GO:0016301~kinase activity,	IPR000719:Protein kinase, catalytic domain,IPR008271:Serine/threonine-protein kinase, active site,IPR011009:Protein kinase-like domain,IPR017441:Protein kinase, ATP binding site,	dme04310:Wnt signaling pathway,dme04340:Hedgehog signaling pathway,dme04711:Circadian rhythm - fly,dme04931:Insulin resistance,		SM00220:S_TKc,	Alternative splicing,ATP-binding,Cell junction,Cell projection,Coiled coil,Complete proteome,Cytoplasm,Cytoskeleton,Developmental protein,Kinase,Meiosis,Nucleotide-binding,Nucleus,Phosphoprotein,Proteomics identification,Reference proteome,Segmentation polarity protein,Serine/threonine-protein kinase,Synapse,Transferase,	active site:Proton acceptor,binding site:ATP,chain:Protein kinase shaggy,compositionally biased region:Ala/Gly/Ser-rich,domain:Protein kinase,modified residue,nucleotide phosphate-binding region:ATP,sequence conflict,splice variant,
45380	spinster(spin)		GO:0003376~sphingosine-1-phosphate signaling pathway,GO:0006897~endocytosis,GO:0007040~lysosome organization,GO:0007422~peripheral nervous system development,GO:0007619~courtship behavior,GO:0008333~endosome to lysosome transport,GO:0008347~glial cell migration,GO:0008582~regulation of synaptic growth at neuromuscular junction,GO:0009267~cellular response to starvation,GO:0010001~glial cell diffe…	GO:0005765~lysosomal membrane,GO:0016021~integral component of membrane,GO:0031902~late endosome membrane,GO:0031982~vesicle,GO:0045202~synapse,	GO:0046624~sphingolipid transporter activity,	IPR011701:Major facilitator superfamily,IPR020846:Major facilitator superfamily domain,				Alternative splicing,Complete proteome,Developmental protein,Differentiation,Endosome,Glycoprotein,Lipid transport,Lysosome,Membrane,Oogenesis,Reference proteome,Transmembrane,Transmembrane helix,Transport,	chain:Protein spinster,glycosylation site:N-linked (GlcNAc...),mutagenesis site,splice variant,transmembrane region,
38424	sprouty(sty)		GO:0001745~compound eye morphogenesis,GO:0001763~morphogenesis of a branching structure,GO:0007169~transmembrane receptor protein tyrosine kinase signaling pathway,GO:0007275~multicellular organism development,GO:0007424~open tracheal system development,GO:0007426~tracheal outgrowth, open tracheal system,GO:0007429~secondary branching, open tracheal system,GO:0007430~terminal branching, open trac…	GO:0005622~intracellular,GO:0005886~plasma membrane,GO:0016020~membrane,		IPR007875:Sprouty,				Cell membrane,Coiled coil,Complete proteome,Developmental protein,Membrane,Reference proteome,	chain:Protein sprouty,compositionally biased region:Asn-rich,compositionally biased region:Cys-rich,compositionally biased region:Gln-rich,compositionally biased region:Gly-rich,compositionally biased region:Poly-Gln,compositionally biased region:Poly-Gly,compositionally biased region:Ser-rich,domain:SPR,sequence conflict,
35865	stambha A(stmA)		GO:0000281~mitotic cytokinesis,GO:0007268~chemical synaptic transmission,GO:0007602~phototransduction,GO:0016079~synaptic vesicle exocytosis,GO:0030100~regulation of endocytosis,GO:0048488~synaptic vesicle endocytosis,	GO:0016021~integral component of membrane,GO:0045202~synapse,GO:0098793~presynapse,		IPR011989:Armadillo-like helical,IPR016024:Armadillo-type fold,				Alternative splicing,Complete proteome,Membrane,Reference proteome,Transmembrane,Transmembrane helix,	chain:Protein EFR3 homolog cmp44E,compositionally biased region:Cys-rich,repeat:HEAT,sequence conflict,splice variant,transmembrane region,
36526	straightjacket(stj)		GO:0007274~neuromuscular synaptic transmission,GO:0007528~neuromuscular junction development,GO:0019233~sensory perception of pain,GO:0045886~negative regulation of synaptic growth at neuromuscular junction,GO:0048488~synaptic vesicle endocytosis,GO:0051924~regulation of calcium ion transport,GO:0070588~calcium ion transmembrane transport,GO:0097352~autophagosome maturation,	GO:0005891~voltage-gated calcium channel complex,GO:0045202~synapse,GO:0048786~presynaptic active zone,	GO:0005246~calcium channel regulator activity,	IPR002035:von Willebrand factor, type A,IPR013608:VWA N-terminal,IPR013680:Voltage-dependent calcium channel, alpha-2/delta subunit, conserved region,			SM00327:VWA,	Complete proteome,Proteomics identification,Reference proteome,Signal,
43036	takeout(to)		GO:0007617~mating behavior,GO:0007622~rhythmic behavior,GO:0007623~circadian rhythm,GO:0007631~feeding behavior,GO:0008049~male courtship behavior,GO:0008343~adult feeding behavior,GO:0042594~response to starvation,GO:0042595~behavioral response to starvation,	GO:0005576~extracellular region,GO:0005615~extracellular space,		IPR010562:Haemolymph juvenile hormone binding,			SM00700:JHBP,	Behavior,Biological rhythms,Complete proteome,Reference proteome,Secreted,Signal,	chain:Protein takeout,signal peptide,
37190	thin(tn)	Function unknown,	GO:0006941~striated muscle contraction,GO:0016567~protein ubiquitination,GO:0030239~myofibril assembly,GO:0046716~muscle cell cellular homeostasis,GO:0048747~muscle fiber development,	GO:0030018~Z disc,	GO:0004842~ubiquitin-protein transferase activity,GO:0008270~zinc ion binding,	IPR001258:NHL repeat,IPR001841:Zinc finger, RING-type,IPR011042:Six-bladed beta-propeller, TolB-like,IPR013017:NHL repeat, subgroup,IPR013083:Zinc finger, RING/FYVE/PHD-type,IPR018957:Zinc finger, C3HC4 RING-type,			SM00184:RING,	Coiled coil,Complete proteome,Metal-binding,Proteomics identification,Reference proteome,Zinc,Zinc-finger,
35717	torso(tor)		GO:0001709~cell fate determination,GO:0006355~regulation of transcription, DNA-templated,GO:0006468~protein phosphorylation,GO:0007280~pole cell migration,GO:0007362~terminal region determination,GO:0007369~gastrulation,GO:0007443~Malpighian tubule morphogenesis,GO:0007552~metamorphosis,GO:0008293~torso signaling pathway,GO:0008595~anterior/posterior axis specification, embryo,GO:0030381~chorion-…	GO:0005886~plasma membrane,GO:0005887~integral component of plasma membrane,	GO:0004713~protein tyrosine kinase activity,GO:0004714~transmembrane receptor protein tyrosine kinase activity,GO:0005524~ATP binding,GO:0046872~metal ion binding,	IPR000719:Protein kinase, catalytic domain,IPR001245:Serine-threonine/tyrosine-protein kinase catalytic domain,IPR003961:Fibronectin, type III,IPR008266:Tyrosine-protein kinase, active site,IPR011009:Protein kinase-like domain,IPR017441:Protein kinase, ATP binding site,IPR020635:Tyrosine-protein kinase, catalytic domain,	dme04013:MAPK signaling pathway - fly,		SM00219:TyrKc,	Alternative splicing,ATP-binding,Complete proteome,Developmental protein,Glycoprotein,Kinase,Magnesium,Membrane,Metal-binding,Nucleotide-binding,Phosphoprotein,Receptor,Reference proteome,Signal,Transferase,Transmembrane,Transmembrane helix,Tyrosine-protein kinase,	active site:Proton acceptor,binding site:ATP,chain:Tyrosine-protein kinase receptor torso,domain:Protein kinase,glycosylation site:N-linked (GlcNAc...),modified residue,nucleotide phosphate-binding region:ATP,sequence conflict,signal peptide,splice variant,topological domain:Cytoplasmic,topological domain:Extracellular,transmembrane region,
33526	toucan(toc)	Cell division and chromosome partitioning,	GO:0007476~imaginal disc-derived wing morphogenesis,GO:0030707~ovarian follicle cell development,GO:0035186~syncytial blastoderm mitotic cell cycle,	GO:0000922~spindle pole,GO:0005634~nucleus,GO:0005813~centrosome,GO:0005819~spindle,GO:0005938~cell cortex,GO:0030496~midbody,GO:0031965~nuclear membrane,						Coiled coil,Complete proteome,Reference proteome,
36003	transient receptor potential-like(trpl)		GO:0006811~ion transport,GO:0006812~cation transport,GO:0006816~calcium ion transport,GO:0006828~manganese ion transport,GO:0007589~body fluid secretion,GO:0007603~phototransduction, visible light,GO:0007605~sensory perception of sound,GO:0009416~response to light stimulus,GO:0019722~calcium-mediated signaling,GO:0050908~detection of light stimulus involved in visual perception,GO:0051480~regulat…	GO:0005622~intracellular,GO:0005886~plasma membrane,GO:0005887~integral component of plasma membrane,GO:0016021~integral component of membrane,GO:0016027~inaD signaling complex,GO:0016028~rhabdomere,GO:0030425~dendrite,GO:0034703~cation channel complex,GO:0035997~rhabdomere microvillus membrane,	GO:0005261~cation channel activity,GO:0005262~calcium channel activity,GO:0005515~protein binding,GO:0005516~calmodulin binding,GO:0010461~light-activated ion channel activity,GO:0015075~ion transmembrane transporter activity,GO:0015279~store-operated calcium channel activity,GO:0042802~identical protein binding,GO:0046982~protein heterodimerization activity,	IPR002110:Ankyrin repeat,IPR002153:Transient receptor potential channel, canonical,IPR004729:Transient receptor potential channel,IPR005821:Ion transport domain,IPR013555:Transient receptor ion channel domain,IPR020683:Ankyrin repeat-containing domain,	dme04745:Phototransduction - fly,		SM00248:ANK,	ANK repeat,Calcium,Calcium channel,Calcium transport,Calmodulin-binding,Complete proteome,Ion channel,Ion transport,Membrane,Receptor,Reference proteome,Repeat,Sensory transduction,Transmembrane,Transmembrane helix,Transport,Vision,	chain:Transient-receptor-potential-like protein,mutagenesis site,region of interest:Calmodulin-binding 1,region of interest:Calmodulin-binding 2,repeat:ANK 1,repeat:ANK 2,repeat:ANK 3,sequence conflict,splice variant,topological domain:Cytoplasmic,topological domain:Extracellular,transmembrane region,
46015	turtle(tutl)		GO:0007411~axon guidance,GO:0007414~axonal defasciculation,GO:0007629~flight behavior,GO:0007638~mechanosensory behavior,GO:0008039~synaptic target recognition,GO:0008344~adult locomotory behavior,GO:0016199~axon midline choice point recognition,GO:0019233~sensory perception of pain,GO:0030537~larval behavior,GO:0045467~R7 cell development,GO:0046331~lateral inhibition,GO:0048814~regulation of de…	GO:0005887~integral component of plasma membrane,GO:0016021~integral component of membrane,	GO:0098632~protein binding involved in cell-cell adhesion,	IPR003598:Immunoglobulin subtype 2,IPR003599:Immunoglobulin subtype,IPR003961:Fibronectin, type III,IPR007110:Immunoglobulin-like domain,IPR013098:Immunoglobulin I-set,IPR013106:Immunoglobulin V-set,IPR013783:Immunoglobulin-like fold,			SM00060:FN3,SM00406:IGv,SM00408:IGc2,SM00409:IG,	Alternative splicing,Complete proteome,Disulfide bond,Immunoglobulin domain,Membrane,Neurogenesis,Reference proteome,Repeat,Transmembrane,Transmembrane helix,	chain:Protein turtle,disulfide bond,domain:Fibronectin type-III 1,domain:Fibronectin type-III 2,domain:Ig-like C2-type 1,domain:Ig-like C2-type 2,domain:Ig-like C2-type 3,domain:Ig-like C2-type 4,domain:Ig-like C2-type 5,sequence conflict,splice variant,topological domain:Cytoplasmic,topological domain:Extracellular,transmembrane region,
35942	unplugged(unpg)		GO:0006351~transcription, DNA-templated,GO:0006355~regulation of transcription, DNA-templated,GO:0007420~brain development,GO:0007424~open tracheal system development,GO:0007426~tracheal outgrowth, open tracheal system,GO:0051960~regulation of nervous system development,	GO:0005634~nucleus,	GO:0003700~transcription factor activity, sequence-specific DNA binding,GO:0043565~sequence-specific DNA binding,	IPR001356:Homeodomain,IPR009057:Homeodomain-like,IPR017970:Homeobox, conserved site,IPR020479:Homeodomain, metazoa,			SM00389:HOX,	Complete proteome,DNA-binding,Homeobox,Nucleus,Reference proteome,Transcription,Transcription regulation,	chain:Homeobox protein unplugged,compositionally biased region:Pro-rich,DNA-binding region:Homeobox,sequence conflict,
38657	vein(vn)		GO:0007173~epidermal growth factor receptor signaling pathway,GO:0007267~cell-cell signaling,GO:0007298~border follicle cell migration,GO:0007420~brain development,GO:0007422~peripheral nervous system development,GO:0007474~imaginal disc-derived wing vein specification,GO:0007476~imaginal disc-derived wing morphogenesis,GO:0007477~notum development,GO:0007479~leg disc proximal/distal pattern form…	GO:0005576~extracellular region,GO:0005615~extracellular space,GO:0005622~intracellular,GO:0005886~plasma membrane,	GO:0005154~epidermal growth factor receptor binding,GO:0008201~heparin binding,	IPR000742:Epidermal growth factor-like domain,IPR003598:Immunoglobulin subtype 2,IPR007110:Immunoglobulin-like domain,IPR013032:EGF-like, conserved site,IPR013098:Immunoglobulin I-set,IPR013783:Immunoglobulin-like fold,	dme04391:Hippo signaling pathway - fly,		SM00408:IGc2,	Alternative splicing,Coiled coil,Complete proteome,Developmental protein,Disulfide bond,EGF-like domain,Glycoprotein,Growth factor,Immunoglobulin domain,Reference proteome,Secreted,Signal,	chain:Protein vein,compositionally biased region:Gln-rich,compositionally biased region:Poly-Gln,compositionally biased region:Poly-Ser,disulfide bond,domain:EGF-like,domain:Ig-like C2-type,glycosylation site:N-linked (GlcNAc...),sequence conflict,signal peptide,splice variant,
32849	wengen(wgn)		GO:0006915~apoptotic process,GO:0007166~cell surface receptor signaling pathway,GO:0070050~neuron cellular homeostasis,GO:0072499~photoreceptor cell axon guidance,GO:1900074~negative regulation of neuromuscular synaptic transmission,	GO:0005887~integral component of plasma membrane,GO:0009986~cell surface,GO:0016021~integral component of membrane,	GO:0005031~tumor necrosis factor-activated receptor activity,GO:0005515~protein binding,	IPR001368:TNFR/NGFR cysteine-rich region,	dme04391:Hippo signaling pathway - fly,		SM00208:TNFR,	Apoptosis,Cell membrane,Coiled coil,Complete proteome,Disulfide bond,Membrane,Neurogenesis,Receptor,Reference proteome,Signal,Transmembrane,Transmembrane helix,
31271	white(w)		GO:0006727~ommochrome biosynthetic process,GO:0006856~eye pigment precursor transport,GO:0007613~memory,GO:0008049~male courtship behavior,GO:0042332~gravitaxis,GO:0042401~cellular biogenic amine biosynthetic process,GO:0042441~eye pigment metabolic process,GO:0048072~compound eye pigmentation,GO:0070731~cGMP transport,	GO:0005886~plasma membrane,GO:0016020~membrane,GO:0016021~integral component of membrane,GO:0031410~cytoplasmic vesicle,	GO:0004888~transmembrane signaling receptor activity,GO:0005524~ATP binding,GO:0016887~ATPase activity,GO:0031409~pigment binding,GO:0042626~ATPase activity, coupled to transmembrane movement of substances,	IPR003439:ABC transporter-like,IPR003593:AAA+ ATPase domain,IPR005284:Pigment precursor permease,IPR013525:ABC-2 type transporter,IPR017871:ABC transporter, conserved site,IPR027417:P-loop containing nucleoside triphosphate hydrolase,			SM00382:AAA,	ATP-binding,Complete proteome,Membrane,Nucleotide-binding,Pigment,Reference proteome,Transmembrane,Transmembrane helix,Transport,	chain:Protein white,domain:ABC transporter,nucleotide phosphate-binding region:ATP,sequence conflict,transmembrane region,
42676	wide awake(wake)		GO:0000132~establishment of mitotic spindle orientation,GO:0007165~signal transduction,GO:0045938~positive regulation of circadian sleep/wake cycle, sleep,GO:0055059~asymmetric neuroblast division,GO:0061172~regulation of establishment of bipolar cell polarity,GO:0098722~asymmetric stem cell division,	GO:0005813~centrosome,GO:0005819~spindle,	GO:0050811~GABA receptor binding,	IPR000159:Ras-association,IPR002110:Ankyrin repeat,IPR003961:Fibronectin, type III,IPR013783:Immunoglobulin-like fold,IPR020683:Ankyrin repeat-containing domain,			SM00248:ANK,SM00314:RA,	ANK repeat,Complete proteome,Reference proteome,
44096	wishful thinking(wit)		GO:0006468~protein phosphorylation,GO:0007165~signal transduction,GO:0007178~transmembrane receptor protein serine/threonine kinase signaling pathway,GO:0007274~neuromuscular synaptic transmission,GO:0007419~ventral cord development,GO:0007528~neuromuscular junction development,GO:0008582~regulation of synaptic growth at neuromuscular junction,GO:0045887~positive regulation of synaptic growth at …	GO:0005769~early endosome,GO:0005886~plasma membrane,GO:0016020~membrane,GO:0016021~integral component of membrane,GO:0045202~synapse,GO:0055037~recycling endosome,	GO:0004672~protein kinase activity,GO:0004675~transmembrane receptor protein serine/threonine kinase activity,GO:0004702~receptor signaling protein serine/threonine kinase activity,GO:0005026~transforming growth factor beta receptor activity, type II,GO:0005524~ATP binding,	IPR000333:Activin type II/Transforming growth factor-beta II receptor,IPR000472:TGF-beta receptor/activin receptor, type I/II,IPR000719:Protein kinase, catalytic domain,IPR011009:Protein kinase-like domain,IPR017441:Protein kinase, ATP binding site,				ATP-binding,Complete proteome,Kinase,Membrane,Nucleotide-binding,Receptor,Reference proteome,Serine/threonine-protein kinase,Signal,Transferase,Transmembrane,Transmembrane helix,
36109	withered(whd)		GO:0006979~response to oxidative stress,GO:0010038~response to metal ion,GO:0042594~response to starvation,GO:0045471~response to ethanol,	GO:0012505~endomembrane system,GO:0016021~integral component of membrane,	GO:0004095~carnitine O-palmitoyltransferase activity,GO:0016746~transferase activity, transferring acyl groups,	IPR000542:Acyltransferase ChoActase/COT/CPT,	dme00071:Fatty acid degradation,dme01212:Fatty acid metabolism,dme04931:Insulin resistance,			Acyltransferase,Complete proteome,Membrane,Proteomics identification,Reference proteome,Transferase,Transmembrane,Transmembrane helix,
